# Supplementary material
Source: PubMed Central journal article supplement (PMC4520721)
Supplement: supp_35.4.388_05b_Supplemental_Material.pdf [file supp_35.4.388_05b_Supplemental_Material.pdf]

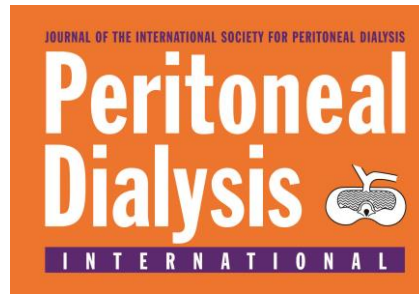

## Supplemental Materials for

### ISPD CARDIOVASCULAR AND METABOLIC GUIDELINES IN ADULT PERTIONEAL DIALYSIS PATIENTS

#### PART II – MANAGEMENT OF VARIOUS CARDIOVASCULAR COMPLICATIONS

Angela Yee Moon Wang<sup>1</sup>, K. Scott Brimble<sup>2</sup>, Gillian Brunier<sup>3</sup>, Steve Holt<sup>4</sup>, Vivekanand Jha<sup>5</sup>, David W Johnson<sup>6,7</sup>, Shin-Wook Kang<sup>8</sup>, Jeroen Kooman<sup>9</sup>, Mark Lambie<sup>10</sup>, Chris McIntyre<sup>11</sup>, Rajnish Mehrotra<sup>12</sup>, Roberto Pecoits-Filho<sup>13</sup>

Department of Medicine,<sup>1</sup> Queen Mary Hospital, University of Hong Kong, Hong Kong; St. Joseph's Healthcare,<sup>2</sup> McMaster University, Hamilton, Ontario, Canada; Lawrence S. Bloomberg Faculty of Nursing,<sup>3</sup> University of Toronto, Toronto, Ontario, Canada; Division of Nephrology,<sup>4</sup> The Royal Melbourne Hospital, University of Melbourne, Melbourne, Australia; George Center for Global Health India,<sup>5</sup> Postgraduate Institute of Medical Education and Research, Chandigarh, India; University of Queensland at Princess Alexandra Hospital,<sup>6</sup> Brisbane, Australia; Centre for Kidney Disease Research,<sup>7</sup> Translational Research Institute, Brisbane, Australia; Department of Internal Medicine,<sup>8</sup> College of Medicine, Severance Biomedical Science Institute, Yonsei University, Korea; Division of Nephrology,<sup>9</sup> University Hospital Maastricht, The Netherlands; Health Services Research Unit,<sup>10</sup> Institute for Science and Technology in Medicine, Keele University, Staffordshire, United Kingdom; School of Medicine,<sup>11</sup> University of Nottingham, Royal Derby Hospital Centre, United Kingdom; Harborview Medical Center,<sup>12</sup> Division of Nephrology/Department of Medicine, University of Washington, Washington, United States; and School of Medicine,<sup>13</sup> Pontifícia Universidade Católica do Paraná, Brazil

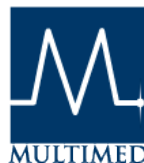

# ISPD CARDIOVASCULAR AND METABOLIC GUIDELINES IN ADULT PERITONEAL DIALYSIS PATIENTS

## PART II – MANAGEMENT OF VARIOUS CARDIOVASCULAR COMPLICATIONS

---

### SECTION 1. CORONARY ARTERY DISEASE

**Guideline 3.1.1: We recommend serial measurements of cardiac troponins be used to evaluate acute myocardial infarction and acute coronary syndrome in peritoneal dialysis patients with acute symptoms (chest pain), along with electrocardiographic changes or other clinical evidence suggestive of acute myocardial ischemia. (1B). A rise in troponin level of >20% within 4 – 6 hours with at least 1 value above the 99th percentile should be diagnosed as acute myocardial infarction or acute coronary syndrome. (1C)**

#### Rationale

Troponin I (TnI) or Troponin T (TnT) levels are frequently elevated in dialysis patients. Whilst there may be changes in the removal of troponins or fragments by residual renal function or different dialysis modalities, the consensus is that elevated levels represent an increased ‘leak’ of these markers from myocytes (1). Whilst there are subtle differences between TnI and TnT in renal failure these are unlikely to be clinically relevant. It is difficult to define a reference range in the normal population, and even more difficult in dialysis patients, thus a single elevated value of Tn without clinical correlates is unlikely to be helpful, apart from indicating enhanced vascular risk (2). A rise in serial markers along with appropriate clinical context is the currently accepted definition of an acute coronary syndrome (ACS) (3). The difficulty is in the definition of how much change constitutes a significant change. A 20% serial change is taken as ~3 standard deviation of change and assumes an analytical coefficient of variation of up to 7% (4).

**Guideline 3.1.2: We suggest asymptomatic peritoneal dialysis patients incidentally found to have high cardiac troponins without dynamic changes be considered as having an elevated cardiovascular risk (2B) and may benefit from investigation for underlying cardiac disease such as cardiac hypertrophy, dysfunction or occult coronary artery disease (ungraded).**

#### Rationale

The rapid development and refinement of assays for troponins, the lack of standardization among assays, the variability of decision limits and changing reference ranges has contributed to confusion around the interpretation of an elevated TnT or TnI in patients with renal dysfunction (3).

‘Standard’ ranges of TnT/TnI have been defined for a reference population with normal renal function, and elevations above the 99<sup>th</sup> percentile of this range provide both sensitive and specific indices of myocardial damage in those with a high pre-test probability of a cardiac event (6). Interestingly there appears to be only moderate correlation between hs-cTnT and hs-cTnI (7), but most physicians regard

TnI and TnT as clinically interchangeable. It is however probable that there are subtle differences in release and metabolism which may make the interpretation of different patterns of release helpful at some point, but since these differences are largely unexplored (especially in the dialysis population) it is unhelpful at this time to consider them separately. In addition many hospitals have decided to use one or the other and rarely use both.

Defining a 'normal' or reference range is also difficult since the upper limit appears to reduce when ever more stringent exclusion of pathology and sex differences are considered (8). However, it is well established that many, if not most, patients with renal dysfunction including those on dialysis, will have higher levels of these biomarkers, especially if one uses the high sensitivity assays(9)(10). There is also uncertainty about whether intra- and inter individual variation in dialysis patients is similar to that seen in normal individuals, although again this may be test specific (11).

There are a small amount of data suggesting that TnI may be slightly more sensitive to an acute myocardial infarction (AMI) than TnT, indicating that perhaps the latter is the preferred biomarker for an AMI (12). However TnT may be a better predicative marker for mortality (13), where TnI has not been established as a prognostic biomarker (14). In the dialysis population there is emerging evidence that the hs-TnT assay may be slightly superior to the standard TnT assay in its ability to predict outcomes(15), but these data are not yet robust, and any modern Tn assay appears to perform well as a prognostic tool.

### **Is Tn elevated because of increased release?**

Cardiac troponins are subunits of the actin-myosin complex (16) that are found in the systemic circulation after release from the cardiac myocyte and have better sensitivity and specificity than older markers like creatine kinase-MB or myoglobin (17). Although most cardiac troponin is released by cardiac myocytes, it is possible to get skeletal muscle to re-express cTnT (for example potentially under uremic conditions), although most agree that cTnI is more cardiac specific (18). There does appear to be a correlation between circulating Tn and left ventricular (LV) mass (19), so it is important to examine whether this finding might explain the adverse prognosis implied by an elevated Tn. In support of this, there is a correlation of TnT with fluid overload in hemodialysis (HD) patients ( $r=0.325$ ,  $P<0.001$ ) (20). In another study of peritoneal dialysis (PD) patients cardiac congestion was predicted by TnT, and this association was not attenuated by the presence of left ventricular hypertrophy (LVH) or C-reactive protein (CRP), suggesting that TnT is independent of LV mass (21).

Nevertheless there is continued debate as to why most dialysis patients have levels of Tn that are above the 99<sup>th</sup> percentile of the reference range. The prevailing consensus is that the uremic state induces subclinical myocardial changes (e.g. LVH, shear stress enhanced permeability and systolic dysfunction) leading to Tn leak from the myocardium and true elevations in blood levels (1).

In patients with stable coronary artery disease and minimal renal dysfunction (creatinine <2 mg/dL/172micromol/L), hs-cTnT levels are detectable in 98% of patients and there is a strong and graded increase in risk of cardiovascular death/heart failure even after multivariate analysis which is continuous below the limits of detection of the conventional assays (~0.01 mcg/L for TnT) (22). In a study comparing 51 asymptomatic PD patients, the median TnI was 0.9 ng/mL (IQR 0.7-0.9) and this was significantly higher than HD patients (0.7 (IQR 0.6-0.8) (23). Similarly in dialysis patients, there may not be a threshold value of Tn at which risk starts to increase, rather there appears to be a graded risk with increasing levels. The associations of Tn and hard outcomes are well established in HD patients (12,24–30) and those studies available including PD patients are shown in Evidence Review Table 1, and show a similar pattern. Surrogate end-point studies are shown in Evidence Review Table 2.

### **Is there evidence of reduced Tn clearance?**

There is contradictory evidence on whether the circulating half-life of immunoreactive troponins is prolonged in renal dysfunction. Intact troponin fragments may be too large to be cleared by glomerular filtration, but fragments may be amenable to renal clearance. Nevertheless some data suggest that most of the immunoreactive circulating TnT is in the form of the intact protein (31) or as complexes (32). Nevertheless, some Tn fragments may be affected by residual renal function (33), which adds a layer of complexity to the analysis because the detection will be determined by the specificity of the capture antibody.

Contradictory data exist with respect to the half-life ( $t_{1/2}$ ) of the troponins; Ellis *et al* reported that TnI does not have a significantly prolonged  $t_{1/2}$  in dialysis patients (34). In contrast Wiessner reported the  $t_{1/2}$  of TnT to be prolonged with progressive renal impairment (35). In two chronic kidney disease (CKD) studies TnI levels were higher in the lower estimated glomerular filtration rate (eGFR) strata (36) or correlated with creatinine (37). The most compelling argument *against* residual renal function playing a significant role in Tn clearance is the demonstration that TnT levels did not seem to be significantly affected by transplantation despite good early graft function, arguing against a major role for renal clearance of Tn (38). However other data showed that TnT levels if elevated, did reduce within 3 weeks of successful transplantation (38), but whether this is due to improved hemodynamics and a better milieu for the myocardium, or reduced TnT from renal excretory/metabolic function remains to be elucidated (39). Another study suggested that if TnT does not normalize post transplantation, then this implies an elevated cardiac risk (38), as it does pre transplant (40).

In summary there is insufficient evidence to know whether renal function significantly effects levels of Tn by enhanced removal or improves myocardial performance. The workgroup felt that the current available evidence is insufficient to draw any recommendation in relation to which troponin to use and whether residual renal function contributes to clearance.

### **Does the Tn level differ with dialysis modality?**

Many assays give upper reference limits defined as the 99<sup>th</sup> percentile of the normal range and are used for identification of patients who are likely to have suffered a myocardial insult. Two issues arise in setting a decision limit for patients on dialysis, firstly these values vary greatly between assays (6). Secondly different dialysis techniques may change the reference range, for example in one study TnI increased in some patients after HD, and this may be identifying patients at higher cardiovascular risk because of myocardial stunning (41,42). High flux dialysis clears troponins more efficiently than low flux (43) and more frequent HD lowers TnT (44). Hemodiafiltration may increase Tn removal but the reinfusion buffer used may be also important (45). In a crossover study, hemodiafiltration caused a reduction in TnT compared with conventional HD where a small rise was seen (46).

In PD, no changes in troponins have been observed after exchanges (47). Nevertheless, immunoreactive TnT can be found in PD fluid effluent (48) and at least one study suggests that TnI levels are significantly lower in PD patients than HD patients (49), suggesting that PD clearance may play a part in determining plasma levels.

A number of studies in PD patients show that it is rare for PD patients to have TnI levels >0.1 ng/mL (23,50–52) or TnT >0.1 ng/mL (53). The workgroup felt that the current available evidence is insufficient to draw any recommendation in relation to differential troponin ranges on different modalities.

### **Using paired values for the diagnosis of acute myocardial infarction/acute coronary syndrome**

An increase in cardiac troponin I (TnI) or T (TnT) over >6hrs is the currently accepted as a test to diagnose an AMI or ACS (3,54). Using paired values make it possible to define a value of a reference change value (RCV). This is the value by which troponin must increase to accurately diagnose AMI/ACS, which in individuals with normal renal function is between ~40 and 90%. However for patients on dialysis this has not been calculated, and may be affected by the assay. However, the National Academy of Clinical Biochemistry (NACB) suggests that a 20% change is used based upon a ~3 standard deviation change, and assuming an up to 7% analytical coefficient of variation (4).

There are now a number of studies looking at the role of troponins in patients with end-stage renal disease, but most patients in these studies have been on HD and the studies have been performed across several decades where methodology has been changing rapidly. However, in a meta-analysis of 39 studies in 2004, Needham *et al* found a specificity of TnI in diagnosing an AMI of 96% (confidence interval: 94–98%) in HD patients, while TnT compared less favorably (71% (64-77)) (55). Two small studies considered asymptomatic PD patients and suggested using a single value of TnI to diagnose an acute event. Here 24/28 PD patients had TnI levels <0.1 ng/mL and none had levels >0.3 ng/mL and suggested that perhaps a single level of TnI >0.4 ng/mL may be diagnostically useful for acute events (50). One study (56) identified

high risk HD patients based upon TnT levels  $\geq 0.7$  ng/mL, of whom a number had subclinical myocardial infarction (MI) on cardiac Magnetic resonance imaging (MRI).

In the short term, the usefulness of a single elevated troponin value may simply rest in its implication of a worse cardiovascular prognosis in patients with moderate to severe CKD(2), for patients on dialysis (14) or with a kidney transplant(40). The diagnosis of acute MI, AMI or ACS should rest on demonstrating an increase in either TnT or TnI of  $\geq 20\%$  over 6-9 hrs(4).

Some units advocate prospectively collecting troponin levels as 'baseline' values with which to compare 'acute' serum levels. The value of this practice is unproven, and whether an elevated risk implied by a high Tn value can be ameliorated by intervention (e.g. coronary artery bypass or angioplasty) is also currently unknown. However we suggest asymptomatic PD patients incidentally found to have high cardiac troponins without dynamic changes may benefit from investigation for underlying cardiac disease, which may include occult or overt coronary artery disease. The workgroup felt that the current available evidence is insufficient to draw any recommendation in relation to monitoring troponin levels prospectively.

**Evidence Review Table 1.** Studies of peritoneal dialysis patients that examined the association of cardiac troponin with hard outcomes

| Reference               | Population       | Patient number | Design                                    | Assay                                                | Outcome  | Follow-up duration | Results                                                                                                                                                                                                                                                                                    | Study quality |
|-------------------------|------------------|----------------|-------------------------------------------|------------------------------------------------------|----------|--------------------|--------------------------------------------------------------------------------------------------------------------------------------------------------------------------------------------------------------------------------------------------------------------------------------------|---------------|
| Hassan et al 2014 (53)  | HD 275<br>PD 118 | 393            | Prospective cohort                        | hsTnT (Elecys, Roche) 5 <sup>th</sup> gen            | MI<br>M  | 59 weeks           | Per 25 ng/L hs-TnT<br>Combined (HD & PD)<br>M:uHR 1.10(1.04-1.16)**<br>M:aHR 1.07(1.01-1.15) <sup>+</sup><br>MI: uHR1.16 (1.08-1.23)**<br>MI: aHR 1.14(1.06-1.22)**<br>PD<br>M uHR1.14 (1.04-1.23)*<br>M: aHR 1.15 (1.04-1.27)**<br>MI uHR 1.21 (1.11-1.31)**<br>MI aHR 1.21 (1.11-1.33)** | B             |
| Han et al 2009 (57)     | PD 107           | 107            | Prospective cohort                        | TnT (Roche)                                          | CVE      | 3 years            | Risk of CVS event<br>TnT >1.1 ng/mL HR 5.89 (CI 1.24-28)*                                                                                                                                                                                                                                  | B             |
| Mcgill et al 2010 (15)  | PD 31<br>HD 112  | 143            | Prospective cohort                        | hscTnT                                               | M        | 46.7 months        | M<br>Per 2.7 nag/L increase in shunt<br>Lon hesitant HR 1.404 (1.001-1.968) <sup>+</sup>                                                                                                                                                                                                   | C             |
| Doman et al 2005 (58)   | PD 65            | 65             | Prospective cohort                        | cant (Roche-Eleusis)<br>catnip (immolate; PDC Corp)- | M<br>CVM | 2 years            | TnT ≥0.035 ng/mL independently predicted;<br>All-cause mortality OR 4.31 (1.16-16.04)*<br>CV mortality OR 8.94 (2.23-35.88)*.<br>Other<br>TnT correlated with LVMI<br>TnI did not significantly correlate with mortality.                                                                  | C             |
| Hickman et al 2009 (59) | PD 31<br>HD 112  | 143            | Baseline cross-sectional with prospective | TnT (Roche elecysis)<br>cTnI (Abbott Diagnostics)    | M        | 30 months          | All-cause mortality<br><br>Detectable Tent (>0.01 nag/mol) OR 11.33 (1.48-86.79)*                                                                                                                                                                                                          | C             |

|                        |               |     |                                                  |                                                   |                          |         |                                                                                                                                                                                                                                                                            |   |
|------------------------|---------------|-----|--------------------------------------------------|---------------------------------------------------|--------------------------|---------|----------------------------------------------------------------------------------------------------------------------------------------------------------------------------------------------------------------------------------------------------------------------------|---|
|                        |               |     | cohort follow up                                 |                                                   |                          |         | Detectable Tin (>0.01 nag/mol) 6.37 OR, (0.82-49.58)(p=ns)                                                                                                                                                                                                                 |   |
| Ishii et al 2001 (13)  | HD 92 PD 8    | 100 | Prospective cohort                               | catnip (Access Immunoassay) cant (Eleusis, Roche) | M                        | 2 years | All-cause mortality was predicted by;<br>Tent RR 3.71(2.66-4.77)*<br>Adverse outcomes associated with;<br>TnT≥0.1 = OR 5.14 * <sup>¶</sup><br>Tnl≥0.1 OR 1.1 <sup>¶</sup>                                                                                                  | C |
| Haceks et al 2006 (60) | HD 550 PD 295 | 845 | Prospective cohort (NECOSAD)                     |                                                   | M, CVM and CVS mortality | ?       | All-cause mortality<br>Tent>0.05-0.1 ng/mL uHR 2.2 (CI 1.7-2.8) aHR 1.2 (CI 0.9-1.7)<br>TnT>0.1 uHR 3.3 (CI 2.5-4.5) aHR 2.2 (CI 1.5-3.3)<br>CVS mortality<br>TnT>0.05-0.1ng/mL uHR 1.9 (1.2-3.0) aHR 1.0 (0.6-1.7)<br>TnT>0.1ng/ml uHR 3.4(2.1-5.7) aHR 1.9 (0.9-3.7)     | B |
| Ryu et al 2011 (61)    | HD 247 PD 37  | 284 | Retrospective review of cases diagnosed with ACS | cTnT (Roche - Elecsys)                            | CVM                      | 6 years | CV mortality (vs TnT≤0.01 ng/mL)<br>Overall uHR 1.12(1.06-1.18)** aHR 1.12 (1.03-1.22)*<br>TnT 0.01-0.1ng/mL uHR 4.11 (1.41-11.96)* aHR-ns<br>TnT 0.1-0.35 ng/mL uHR 7.81(2.77-22.03)* aHR=ns<br>TnT ≥ 0.35 ng/mL uHR 13.27(4.57-38.53)* aHR 8.65(1.01-74.01) <sup>†</sup> | C |



|                         |        |     |                    |                                                      |          |         |                                                                                                                                                                                         |   |
|-------------------------|--------|-----|--------------------|------------------------------------------------------|----------|---------|-----------------------------------------------------------------------------------------------------------------------------------------------------------------------------------------|---|
| Wang et al 2007 (62)    | PD 238 | 238 | Prospective cohort | cTnT (Roche 3rd generation electrochemiluminescence) | M<br>CVE | 3 years | All-cause mortality aHR 4.43(1.87-10.45)*<br>CVS death aHR 4.12(1.29-13.17)*<br>Non-cardiovascular death aHR 8.06 (CI 1.86-35.03)*<br>Fatal/nonfatal CVS events aHR 3.59 (CI 1.48-8.7)* | B |
| Lowbeer et al 2003 (63) | PD 26  | 26  | Prospective cohort | cTnT (Enzymum-test Troponin T)                       | M        | 4 years | All-cause mortality:<br>TnT≥0.04 µg/L: OR 3.43 <sup>¶</sup>                                                                                                                             | C |
| Wang et al 2010 (64)    | PD 130 | 130 | Prospective cohort | cTnT (Elecsys, Roche)                                | SCD      | 5 years | SCD<br>per 0.1ng/mL increase in TnT<br>uHR 1.25 (1.13-1.38)**<br>aHR 1.14 (0.99-1.30 9)(p=ns)                                                                                           | B |

(Note µg/L and ng/mL are synonymous; therefore ng/mL used)

<sup>¶</sup> Insufficient data given to calculate confidence interval. \*p<0.05

HD = hemodialysis; PD = peritoneal dialysis; MI = myocardial infarction; M = mortality; RR = relative risk; HR = hazard ratio (unadjusted (i.e. univariate) uHR, adjusted (i.e. after multivariable adjustment) aHR) (given with 95% confidence intervals in brackets if available); OR = odds ratio (with 95% confidence limits if available); LVMI = left ventricular mass index. MVA = multivariate analysis; SCD = sudden cardiac death; cTnT = cardiac troponin T; cTnI = cardiac troponin I; CVS = cardiovascular surgery; CVM = cardiovascular mortality; CVE = cardiovascular event; ACS = acute coronary syndrome.

**Evidence Review Table 2.** Studies of peritoneal dialysis patients with surrogate end-points of cardiovascular disease

| Reference                | Population     | Patient number | Design             | Outcomes of interest                                                                                | Assay                                | Follow up duration | Results                                                                                                                                                  | Study quality |
|--------------------------|----------------|----------------|--------------------|-----------------------------------------------------------------------------------------------------|--------------------------------------|--------------------|----------------------------------------------------------------------------------------------------------------------------------------------------------|---------------|
| Wang et al 2006 (65)     | PD 222         | 222            | Prospective cohort | Cardiovascular congestion, Left ventricular mass                                                    | TnT (Roche)                          | 3 years            | TnT independently predicted congestion (per 1ug/L)<br>HR 2.98 (CI 1.19-7.42)*<br>TnT correlated with LV mass index (Spearman r=0.44**)                   | B             |
| Caliskan et al 2012 (66) | PD 37          | 37             | Point prevalence   | Carotid intimal medial thickness (CIMT)<br>Pulse wave velocity (PWV)<br>Coronary flow reserve (CFR) | TnT (Roche electrochemiluminescence) | -                  | TnT correlated with<br>CIMT (r <sup>2</sup> =0.557)*<br>PWV (r <sup>2</sup> =0.186)*<br>CFR (r <sup>2</sup> =0.192)*                                     | C             |
| Taskapan et al 2007 (67) | HD 26<br>PD 26 | 52             | Point prevalence   | Brain natriuretic peptide (BNP)                                                                     | TnI (Abbott)                         | -                  | BNP correlated with TnI (r=0.405)*<br>HD Mean TnI 0.05ng/ml (SD 0.07)<br>PD Mean TnI =0.02 (SD 0.02)*<br>TnT or TnI did not correlate with QT dispersion | C             |
| Zapolski 2012 (68)       | HD73<br>PD 57  | 120            | Point prevalence   | Aortic stiffness Index (ASI)                                                                        | cTnT(Roche)                          | -                  | TnT correlated with ASI<br>PD beta 0.33 ** (HD beta 0.443)**                                                                                             | C             |
| Park et al 2009 (69)     | PD 30          | 30             | Point prevalence   | TnT (Roche)<br>LV mass index by echo                                                                |                                      | -                  | TnT did not correlate with LV mass index                                                                                                                 | C             |

PD = peritoneal dialysis; HD = hemodialysis; cTnT = cardiac troponin T; cTnI = cardiac troponin I; HR = hazard ratio; CI = confidence interval; LV = left ventricular



## References

1. Wang AY-M, Wai-Kei Lam C. The diagnostic utility of cardiac biomarkers in dialysis patients. *Semin Dial.* 2012;25(4):388–96.
2. Melloni C, Alexander KP, Milford-Beland S, Newby LK, Szczech LA, Pollack C V, et al. Prognostic value of troponins in patients with non-ST-segment elevation acute coronary syndromes and chronic kidney disease. *Clin Cardiol.* 2008;31(3):125–9.
3. Newby LK, Jesse RL, Babb JD, Christenson RH, De Fer TM, Diamond G a, et al. ACCF 2012 expert consensus document on practical clinical considerations in the interpretation of troponin elevations: a report of the American College of Cardiology Foundation task force on Clinical Expert Consensus Documents. *J Am Coll Cardiol.* 2012;60(23):2427–63.
4. Wu AHB, Jaffe AS, Apple FS, Jesse RL, Francis GL, Morrow DA, et al. National Academy of Clinical Biochemistry laboratory medicine practice guidelines: use of cardiac troponin and B-type natriuretic peptide or N-terminal 2proB-type natriuretic peptide for etiologies other than acute coronary syndromes and heart failure. *Clin Chem.* 2007;53(12):2086–96.
5. Garg R, Singh A, Khaja A, Martin A, Aggarwal K. How does volume status affect BNP and troponin levels as markers of cardiovascular status in peritoneal dialysis? *Congest Heart Fail.* 2009;15(5):240–4.
6. Apple FS, Collinson PO. Analytical characteristics of high-sensitivity cardiac troponin assays. *Clin Chem.* 2012;58(1):54–61.
7. Omland T, Pfeiffer MA, Solomon SD, de Lemos JA, Røsjø H, Šaltytė Benth J, et al. Prognostic value of cardiac troponin I measured with a highly sensitive assay in patients with stable coronary artery disease. *J Am Coll Cardiol.* 2013;61(12):1240–9.
8. Korley FK, Jaffe AS. Preparing the United States for high-sensitivity cardiac troponin assays. *J Am Coll Cardiol.* 2013;61(17):1753–8.
9. Aviles RJ, Askari AT, Lindahl B, Wallentin L, Jia G, Ohman EM, et al. Troponin T levels in patients with acute coronary syndromes, with or without renal dysfunction. *N Engl J Med.* 2002 Jun 27 [cited 2013 Jul 11];346(26):2047–52. Available from: <http://www.ncbi.nlm.nih.gov/pubmed/12087140>
10. deFilippi C, Seliger SL, Kelley W, Duh S-H, Hise M, Christenson RH, et al. Interpreting cardiac troponin results from high-sensitivity assays in chronic kidney disease without acute coronary syndrome. *Clin Chem.* 2012;58(9):1342–51.
11. Apple FS. Predictive Value of Cardiac Troponin I and T for Subsequent Death in End-Stage Renal Disease. *Circulation.* 2002;106(23):2941–5.
12. Artunc F, Mueller C, Breidhardt T, Twerenbold R, Peter A, Thamer C, et al. Sensitive troponins--which suits better for hemodialysis patients? Associated factors and prediction of mortality. *PLoS One.* 2012 Jan;7(10):e47610.
13. Ishii J, Nomura M, Okuma T, Minagawa T, Naruse H, Mori Y, et al. Risk stratification using serum concentrations of cardiac troponin T in patients with end-stage renal disease on chronic maintenance dialysis. *Clin Chim Acta.* 2001;312(1-2):69–79.
14. Khan N a, Hemmelgarn BR, Tonelli M, Thompson CR, Levin A, De la Cueva J, et al. Prognostic value of troponin T and I among asymptomatic patients with end-stage renal disease: a meta-analysis. *Circulation.* 2005;112(20):3088–96.

15. McGill D, Talaulikar G, Potter JM, Koerbin G, Hickman PE. Over time, high-sensitivity TnT replaces NT-proBNP as the most powerful predictor of death in patients with dialysis-dependent chronic renal failure. *Clin Chim Acta* . 2010;411(13-14):936–9.
16. Katrukha IA. Human cardiac troponin complex. Structure and functions. *Biochem Biokhimiia*. 2013;78(13):1447–65.
17. Thygesen K, Alpert JS, White HD, Jaffe AS, Apple FS, Galvani M, et al. Universal definition of myocardial infarction. *Circulation*. 2007; 27;116(22):2634–53.
18. McLaurin MD, Apple FS, Voss EM, Herzog C a, Sharkey SW. Cardiac troponin I, cardiac troponin T, and creatine kinase MB in dialysis patients without ischemic heart disease: evidence of cardiac troponin T expression in skeletal muscle. *Clin Chem*. 1997;43(6 Pt 1):976–82.
19. Mallamaci F, Zoccali C, Parlongo S, Tripepi G, Benedetto FA, Cutrupi S, et al. Diagnostic value of troponin T for alterations in left ventricular mass and function in dialysis patients. *Kidney Int*. 2002;62(5):1884–90.
20. Antlanger M, Hecking M, Haidinger M, Werzowa J, Kovarik JJ, Paul G, et al. Fluid overload in hemodialysis patients: a cross-sectional study to determine its association with cardiac biomarkers and nutritional status. *BMC Nephrol*. 2013;14:266.
21. Wang AY-M, Lam CW-K, Wang M, Chan IH-S, Lui S-F, Zhang Y, et al. Diagnostic potential of serum biomarkers for left ventricular abnormalities in chronic peritoneal dialysis patients. *Nephrol Dial Transplant*. 2009;24(6):1962–9.
22. Ja L, Omland T, de Lemos J a, Sabatine MS, Christophi CA, Rice MM, et al. A sensitive cardiac troponin T assay in stable coronary artery disease. *N Engl J Med*. 2009;361(26):2538–47.
23. Sahinarslan A, Güz G, Mutluay RR, Okyay K, Demirtaş C, Paşaoğlu H, et al. The impact of dialysis type on biomarkers for cardiovascular diseases. *Arch Turk Soc Cardiol*. 2011;39(6):456–62.
24. Dierkes J, Domröse U, Westphal S, Ambrosch A, Bosselmann HP, Neumann KH, et al. Cardiac troponin T predicts mortality in patients with end-stage renal disease. *Circulation*. 2000;102(16):1964–9.
25. Deegan PB, Lafferty ME, Blumsohn A, Henderson IS, McGregor E. Prognostic value of troponin T in hemodialysis patients is independent of comorbidity. *Kidney Int* . 2001;60(6):2399–405.
26. Satyan S, Light RP, Agarwal R. Relationships of N-terminal pro-B-natriuretic peptide and cardiac troponin T to left ventricular mass and function and mortality in asymptomatic hemodialysis patients. *Am J Kidney Dis*. 2007;50(6):1009–19.
27. Conway B, McLaughlin M, Sharpe P, Harty J. Use of cardiac troponin T in diagnosis and prognosis of cardiac events in patients on chronic haemodialysis. *Nephrol Dial Transplant*. 2005;20(12):2759–64.
28. Alam A, Palumbo A, Mucsi I, Barré PE, Sniderman AD. Elevated troponin I levels but not low grade chronic inflammation is associated with cardiac-specific mortality in stable hemodialysis patients. *BMC Nephrol*. 2013;14:247.
29. Lievens H, Kalantar-Zadeh K, Lukowsky LR, Molnar MZ, Duong U, Nissenson A, et al. Relationship of body size and initial dialysis modality on subsequent transplantation, mortality and weight gain of ESRD patients. *Nephrol Dial Transplant*. 2012;27(9):3631–8.
30. Kalaji FR, Albitar S. Predictive value of cardiac troponin T and I in hemodialysis patients. *Saudi J Kidney Dis Transpl*. 2012;23(5):939–45.

31. Fahie-Wilson MN, Carmichael DJ, Delaney MP, Stevens PE, Hall EM, Lamb EJ. Cardiac troponin T circulates in the free, intact form in patients with kidney failure. *Clin Chem*. 2006;52(3):414–20.
32. Bates KJ, Hall EM, Fahie-Wilson MN, Kindler H, Bailey C, Lythall D, et al. Circulating immunoreactive cardiac troponin forms determined by gel filtration chromatography after acute myocardial infarction. *Clin Chem*. 2010;56(6):952–8.
33. Diris JHC, Hackeng CM, Kooman JP, Pinto YM, Hermens WT, van Dieijen-Visser MP. Impaired renal clearance explains elevated troponin T fragments in hemodialysis patients. *Circulation*. 2004;109(1):23–5.
34. Ellis K, Dreisbach AW, Lertora JL. Plasma elimination of cardiac troponin I in end-stage renal disease. *South Med J*. 2001;94(10):993–6.
35. Wiessner R, Hannemann-Pohl K, Ziebig R, Grubitzsch H, Hocher B, Vargas-Hein O, et al. Impact of kidney function on plasma troponin concentrations after coronary artery bypass grafting. *Nephrol Dial Transplant*. 2008;23(1):231–8.
36. Levin A, Rigatto C, Brendan B, Madore F, Muirhead N, Holmes D, et al. Cohort profile: Canadian study of prediction of death, dialysis and interim cardiovascular events (CanPREDDICT). *BMC Nephrol*. 2013;14:121.
37. Zand Parsa AF, Abdolahi A, Mahdavamazdeh M. Is cardiac biomarkers and left ventricular function affected by chronic kidney disease? *Indian Heart J*. 2012;64(5):479–83.
38. Fredericks S, Chang R, Gregson H, Bewick M, Collinson PO, Gaze D, et al. Circulating cardiac troponin-T in patients before and after renal transplantation. *Clin Chim Acta*. 2001;310(2):199–203.
39. Wu AHB, Feng Y-J, Roper L, Herbert K, Schweizer R. Cardiac Troponins T and I Before and After Renal Transplantation. *Clin Chem*. 1997;43(2):411– 412.
40. Keddis MT, El-Zoghby ZM, El Ters M, Rodrigo E, Pellikka PA, Jaffe AS, et al. Cardiac troponin T before and after kidney transplantation: determinants and implications for posttransplant survival. *Am J Transplant*. 2013;13(2):406–14.
41. Assa S, Gansevoort RT, Westerhuis R, Kobold ACM, Voors A a, de Jong PE, et al. Determinants and prognostic significance of an intra-dialysis rise of cardiac troponin I measured by sensitive assay in hemodialysis patients. *Clin Res Cardiol*. 2013;102(6):439–45.
42. Breidthardt T, Burton JO, Odudu A, Eldehni MT, Jefferies HJ, McIntyre CW. Troponin T for the detection of dialysis-induced myocardial stunning in hemodialysis patients. *Clin J Am Soc Nephrol*. 2012;7(8):1285–92.
43. Lippi G, Tessitore N, Montagnana M, Salvagno GL, Lupo A, Guidi GC. Influence of sampling time and ultrafiltration coefficient of the dialysis membrane on cardiac troponin I and T. *Arch Pathol Lab Med*. 2008;132(1):72–6.
44. Jefferies HJ, Virk B, Schiller B, Moran J, McIntyre CW. Frequent hemodialysis schedules are associated with reduced levels of dialysis-induced cardiac injury (myocardial stunning). *Clin J Am Soc Nephrol*. 2011;6(6):1326–32.
45. Bolasco P, Ghezzi PM, Serra A, Corazza L, Fundoni GF, Pistis R, et al. Effects of acetate-free haemodiafiltration (HDF) with endogenous reinfusion (HFR) on cardiac troponin levels. *Nephrol Dial Transplant*. 2011;26(1):258–63.
46. Selby NM, Fluck RJ, Taal MW, McIntyre CW. Effects of acetate-free double-chamber hemodiafiltration and standard dialysis on systemic hemodynamics and troponin T levels. *ASAIO J* . 2006;52(1):62–9.

47. Kocak G, Azak A, Huddam B, Yalcin F, Güven B, Can M, et al. Influence of intraperitoneal volume on QT dispersion in patients with continuous ambulatory peritoneal dialysis: acute cardiac impact of peritoneal dialysis. *Ren Fail.* 2011;33(6):568–71.
48. Lai KN, Lam MF, Leung JCK, Chan LY, Lam CWK, Chan IHS, et al. A study of the clinical and biochemical profile of peritoneal dialysis fluid low in glucose degradation products. *Perit Dial Int.* 2012 May;32(3):280–91.
49. Al-Hweish A, Sultan SS, Mogazi K, Elsammak MY. Plasma myeloperoxidase, NT-proBNP, and troponin-I in patients on CAPD compared with those on regular hemodialysis. *Hemodial Int.* 2010;14(3):308–15.
50. Hussein MM, Mooij JM, Malki N Al, Demerdash TM, Abdullah Y. Troponin-I is Not Falsely Elevated in Asymptomatic Dialysis Patients. *Saudi J Kidney Dis Transplant.* 2013;24(1):48–53.
51. Ninan VT, Hilali N, Ali JH, Nampoory MRN, Akanji AQ, Hussain AA, et al. Baseline cardiac troponin I in patients on maintenance dialysis. *Transplant Proc.* 2004;36(6):1829–30.
52. Morton AR, Collier CP, Ali N, Dagnone LE. Cardiac troponin I in patients receiving renal replacement therapy. *ASAIO J.* 1998;44(5):M433–5.
53. Hassan HC, Howlin K, Jefferys A, Spicer ST, Aravindan AN, Suryanarayanan G, et al. High-sensitivity troponin as a predictor of cardiac events and mortality in the stable dialysis population. *Clin Chem.* 2014;60(2):389–98.
54. Wu AHB, Christenson RH. Analytical and assay issues for use of cardiac troponin testing for risk stratification in primary care. *Clin Biochem.* 2013;1–10.
55. Needham DM, Shufelt KA, Tomlinson G, Scholey JW, Newton GE. Troponin I and T levels in renal failure patients without acute coronary syndrome: a systematic review of the literature. *Can J Cardiol.* 2004;20(12):1212–8.
56. deFilippi CR, Thorn EM, Aggarwal M, Joy A, Christenson RH, Duh S-H, et al. Frequency and cause of cardiac troponin T elevation in chronic hemodialysis patients from study of cardiovascular magnetic resonance. *Am J Cardiol.* 2007;100(5):885–9.
57. Han SH, Choi HY, Kim DK, Moon SJ, Lee JE, Yoo TH, et al. Elevated cardiac troponin T predicts cardiovascular events in asymptomatic continuous ambulatory peritoneal dialysis patients without a history of cardiovascular disease. *Am J Nephrol.* 2009;29(2):129–35.
58. Duman D, Tokay S, Toprak A, Duman D, Oktay A, Ozener IC, et al. Elevated cardiac troponin T is associated with increased left ventricular mass index and predicts mortality in continuous ambulatory peritoneal dialysis patients. *Nephrol Dial Transplant.* 2005;20(5):962–7.
59. Hickman PE, McGill D a, Talaulikar G, Hiremagalur B, Bromley J, Rahman a, et al. Prognostic efficacy of cardiac biomarkers for mortality in dialysis patients. *Intern Med J.* 2009;39(12):812–8.
60. Havekes B, van Manen JG, Krediet RT, Boeschoten EW, Vandenbroucke JP, Dekker FW. Serum troponin T concentration as a predictor of mortality in hemodialysis and peritoneal dialysis patients. *Am J Kidney Dis.* 2006;47(5):823–9.
61. Ryu D-R, Park JT, Chung JH, Song EM, Roh SH, Lee J-M, et al. A more appropriate cardiac troponin T level that can predict outcomes in end-stage renal disease patients with acute coronary syndrome. *Yonsei Med J.* 2011;52(4):595–602.
62. Wang AY-M, Lam CW-K, Wang M, Chan IH-S, Goggins WB, Yu C-M, et al. Prognostic value of cardiac troponin T is independent of inflammation, residual renal function, and cardiac hypertrophy and dysfunction in peritoneal dialysis patients. *Clin Chem.* 2007;53(5):882–9.

63. Löwbeer C, Gutierrez A, Gustafsson S a, Norrman R, Hulting J, Seeberger A. Elevated cardiac troponin T in peritoneal dialysis patients is associated with CRP and predicts all-cause mortality and cardiac death. *Nephrol Dial Transplant*. 2002;17(12):2178–83.
64. Wang AY-M, Lam CW-K, Chan IH-S, Wang M, Lui S-F, Sanderson JE. Sudden cardiac death in end-stage renal disease patients: a 5-year prospective analysis. *Hypertension*. 2010;56(2):210–6.
65. Wang AY-M, Lam CW-K, Yu C-M, Wang M, Chan IH-S, Lui S-F, et al. Troponin T, left ventricular mass, and function are excellent predictors of cardiovascular congestion in peritoneal dialysis. *Kidney Int*. 2006;70(3):444–52.
66. Caliskan Y, Ozkok A, Akagun T, Alpay N, Guz G, Polat N, et al. Cardiac biomarkers and noninvasive predictors of atherosclerosis in chronic peritoneal dialysis patients. *Kidney Blood Press Res*. 2012;35(5):340–8.
67. Taskapan MC, Taskapan H, Ulutas O, Orhan M, Sahin I. Relationships between brain natriuretic peptide, troponin I and QT dispersion in asymptomatic dialysis patients. *Ren Fail*. 2007;29(2):221–5.
68. Zapolski T, Jaroszyński A, Drelich-Zbroja A, Wysocka A, Furmaga J, Wysokiński A, et al. Aortic stiffness, left ventricle hypertrophy, and homogeneity of ventricle repolarization in adult dialyzed patients. *ScientificWorldJournal*. 2012;2012:947907.
69. Park S-H, Lee S-W, Lee S-J, Shin W-Y, Jin D-K, Gil H-W, et al. The association between left ventricular hypertrophy and biomarkers in patients on continuous ambulatory peritoneal dialysis. *Korean Circ J*. 2009;39(11):488–93.

**Guideline 3.1.3: We recommend a thorough history and physical examination in all patients initiating peritoneal dialysis therapy to identify any significant cardiac conditions including coronary artery disease, recent myocardial infarction, decompensated heart failure, significant arrhythmias, and severe valvular disease for further specific management.**

**Guideline 3.1.4: We suggest noninvasive stress testing be considered in peritoneal dialysis patients who are kidney transplant candidates and without active cardiac conditions but on the basis of presence of 3 or more coronary artery disease risk factors: diabetes mellitus, prior cardiovascular disease, >1 year on dialysis, left ventricular hypertrophy, age >60 years, smoking, hypertension, and dyslipidemia. (2C)**

#### **Rationale**

Coronary artery disease (CAD) is under-diagnosed and under-treated in patients with CKD, therefore identifying treatable disease is desirable. The expected benefits must weigh against the costs and risks associated with screening. Screening can be justified only when the burden of asymptomatic disease is high and when intervention after active screening and diagnosis improves clinical outcomes. The major factors that drive the high prevalence of CAD in the dialysis population are age and the high prevalence of diabetes. In contrast to the general population, a large majority of dialysis patients with CAD are asymptomatic. In addition, acute MI or unstable angina can develop in individuals with non-obstructive CAD, probably as a result of plaque rupture or destabilization.

Whether or not percutaneous coronary intervention or coronary artery bypass grafting improves outcomes of asymptomatic dialysis patients with CAD is unclear. Population-based randomized controlled trials (RCTs) have excluded patients with CKD. However, observational studies suggest



that interventions may be associated with survival benefit compared to conservative management<sup>1,2</sup>. This issue becomes even more critical for patients on the waiting list for transplantation, who are at risk of intra- or post-operative death from MI. Cardiac evaluation could also be used to deny transplantation to high-risk patients if they are deemed to have sufficiently short life expectancy to make transplantation a poor use of scarce donated organs.

The National Kidney Foundation Kidney Disease Outcomes Quality Initiative (NKF-KDOQI), United Kingdom - National Institute for Health and Care Excellence (UK-NICE) and American Heart Association/ American College of Cardiology (AHA/ACC) have therefore come up with guidelines for evaluation for CAD in the dialysis population and those awaiting transplantation<sup>3-5</sup>. All the guidelines acknowledged the lack of high quality evidence in non-dialysis CKD and dialysis patients to inform guideline development (Table 1).

Nevertheless, the major justification for advocating screening in this population is the high prevalence of asymptomatic CAD [Evidence Review Table 2]. In a community-based study of patients hospitalized with acute MI, patients with underlying kidney disease were less likely to report chest pain and more likely to report shortness of breath compared with patients without kidney disease in the setting of acute MI.<sup>6</sup> Using multidetector row computed tomography, Lee et al identified CAD in 32% asymptomatic incident dialysis patients<sup>7</sup>. The majority of dialysis patients with angiographically documented CAD are asymptomatic. Braun et al.<sup>8</sup> reported that 75% of diabetic HD patients with confirmed coronary artery stenosis had no symptoms. In two other studies, 74% and 67% of dialysis patients with CAD were asymptomatic at the time of angiography.<sup>9,10</sup> In a recent study from Japan, the prevalence of unidentified CAD in dialysis patients declined from 69% to 25% from 1993 to 2010<sup>11</sup>. PD patients exhibit a higher prevalence of cardiovascular disease (CVD) risk factors<sup>12</sup> and poor survival compared to HD patients<sup>13</sup>. In a preliminary report of 256 percutaneous coronary interventions performed in 111 patients, silent myocardial ischemia, defined as the absence of chest pain in response to balloon dilatation of the affected vessel, was present in 59.1% of subjects with CKD versus 29.1% of subjects without CKD.<sup>14</sup> However, the value of routine screening in asymptomatic patients that will benefit from revascularization has not been defined.

Exercise tolerance was suggested the main clinical parameter to be included in the testing algorithm suggested in the "ACC/AHA 2007 Guidelines on Perioperative Cardiovascular Evaluation and Care for Noncardiac Surgery."<sup>15</sup> Self-reported poor exercise tolerance was associated with twice as many perioperative cardiovascular complications compared to those with better functional status.<sup>16</sup> However, this simple clinical tool has not been validated at all in the CKD or dialysis population.

Noninvasive testing for CAD has imperfect sensitivity and specificity in patients with end-stage renal disease (ESRD). Evidence Review Table 3 summarizes studies examining the associations between non-invasive cardiac stress testing and occlusive coronary artery lesions on angiography in patients with ESRD. Abnormal myocardial perfusion scintigraphy (MPS) and dobutamine stress echocardiography (DSE) results have been associated with an increased risk of adverse cardiac events and mortality in the ESRD population. In a meta-analysis of 12 studies involving either thallium-201 scintigraphy or DSE, patients with ESRD with inducible ischemia had ≈6 times the risk of an MI and 4 times the risk of cardiac death as patients without inducible defects.<sup>17</sup> Moreover, patients with fixed defects had nearly 5 times the risk of cardiac death. Among 485 patients with advanced kidney disease, the percentage of ischemic segments by DSE was an independent predictor of mortality and offered prognostic information beyond clinical characteristics alone.<sup>18</sup> Also complicating the issue is the fact that the association of CAD demonstrated by angiography with subsequent survival in ESRD is inconsistent<sup>11,19</sup>, likely because plaque instability is more

important for risk of major adverse coronary events than angiographic stenosis and many plaque ruptures producing MIs are not localized to sites of angiographic stenosis.<sup>20,21</sup>

The AHA/ACC guidelines<sup>4</sup> suggest using aggregate CAD risk factors for targeted screening to identify those with the highest pretest likelihood of prognostically significant CAD. Presence of “active cardiac conditions” listed above (unstable angina, recent MI, decompensated heart failure, significant arrhythmia, and severe valvular heart disease) qualifies as major risk. If none of these are present, the patient is then risk stratified on the basis of functional capacity. If the functional status is estimated as  $\geq 4$  METS, then that patient is deemed low risk and no further testing is advocated. If functional capacity is  $< 4$  METS, it is difficult to know whether the low level of exertion is preventing manifestation of an active cardiac condition or whether cardiac conditions are truly absent. Such patients are considered to be of indeterminate cardiac risk and are further risk stratified according to the presence or absence of risk markers, namely, ischemic heart disease, compensated or prior heart failure, diabetes mellitus, renal insufficiency, and cerebrovascular disease. Because the presence of any of these risk markers is associated with an increased likelihood of CAD among patients with poor functional status, the diagnostic yield of noninvasive stress testing theoretically improves as one acquires more risk factors.

As for risk stratification among potential kidney transplant candidates, the 2012 AHA guidelines<sup>4</sup> recommend risk-factor based stratification regardless of functional status. Another set of risk factors were defined specifically for the transplant population in the 2007 Lisbon Conference<sup>22</sup>. Compared to ACC/AHA, the Lisbon strategy improves the sensitivity and specificity in identifying significant CAD (sensitivity, 94% versus 77%; specificity, 33% versus 24%) and to reduce the overall frequency of testing.<sup>23</sup> The Lisbon Conference on the care of the kidney transplant recipient identified diabetes mellitus, prior cardiovascular disease,  $>1$  year on dialysis, LVH, age  $>60$  years, smoking, hypertension, and dyslipidemia as risk factors for CAD for prospective kidney transplant recipients<sup>22</sup>. The NKF-KDOQI approach would have identified all patients with abnormal stress tests and revascularizations but this comes with significant additional costs and unclear outcome benefits. Compared to the NKF-KDOQI approach, the ACC/AHA guideline approach would decrease the rate of stress test significantly by 80% but this approach would have identified only 24% of patients who had an abnormal stress test and only 40% of patients who underwent revascularization. The Lisbon approach would result in an intermediate rate in recommending preoperative cardiac evaluation in 68% of subjects. Even though the ACC/AHA guideline would have missed some of the patients with single vessel disease, the benefit of percutaneous coronary intervention beyond medical therapy has not been evaluated in randomized studies in dialysis patients and has remained uncertain. Thus, summarizing the current recommendations given by the various guidelines group and with the lack of high quality evidence in this aspect, the work group would suggest a more targeted approach and screen only PD patients with relevant risk factors for CAD including diabetes mellitus, prior cardiovascular disease,  $>1$  year on dialysis, LVH, age  $>60$  years, smoking, hypertension, and dyslipidemia with non-invasive stress testing.

**The specific number of risk factors that should be used to initiate stress testing remains to be determined but  $\geq 3$  is regarded a reasonable threshold and in keeping with the ACC/AHA guideline. These include diabetes mellitus, prior cardiovascular disease,  $>1$  year on dialysis, left ventricular hypertrophy, age  $>60$  years, smoking, hypertension, and dyslipidemia.**

The workgroup felt that current available evidence does not allow recommendation to be drawn on the frequency of repeat screening or stress testing for PD patients who are on transplant waiting list. The 2005 NKF-KDOQI guidelines recommended repeat stress testing once a year among patients on the transplant list.<sup>5</sup> However, the cardiac event rate (cardiac death or nonfatal MI) was only 0.6% over 2 to 3 years in 7376 patients with a normal myocardial perfusion stress

(MPS), suggesting that the “warranty” on a normal myocardial stress perfusion is at least 2 years in a general population;<sup>24</sup> however, only 10% of participants in this study were diabetic. Data suggest that the event rate is higher in subjects with diabetes, and increases in a graded manner with declining renal function.<sup>24,25</sup>

**Table 1: Existing guidelines for testing for coronary artery disease in asymptomatic kidney transplantation candidates**

**2012 AHA/ACC Consensus document**<sup>4</sup>

- Risk-factor based noninvasive stress testing regardless of functional status (Class IIb, Level of Evidence C)
- Risk factors: diabetes mellitus, prior cardiovascular disease,  $\geq 1$  y on dialysis, LVH, age  $\geq 60$  y, smoking, hypertension, and dyslipidemia (3 or more)

**2010 UK Renal Association Guidelines**<sup>3</sup>

- Dialysis patients should have unimpeded access to a full range of cardiac investigations including exercise and stress echocardiography, radio-isotopic cardiac scans and coronary angiography. (2D)
- There should be no clinically important delay for pre-dialysis and dialysis patients in receiving assessment by cardiology colleagues for their suitability for transplantation. (2D)

**2007 ACC/AHA Guidelines**<sup>15</sup>

- Risk-factor based noninvasive stress testing if functional status  $< 4$  METS or unknown clinical risk factors : Ischemic heart disease, Compensated or prior heart failure, Diabetes mellitus, Renal insufficiency, Cerebrovascular disease
- Recommendations stronger if  $\geq 3$  clinical risk factors are present but may be considered in those with 1–2 risk factors

**2007 Lisbon Conference**<sup>22</sup>

- Noninvasive and/or invasive testing should be considered in highest-risk patients with Diabetes mellitus, Prior cardiovascular disease, Multiple cardiac risk factors such as  $\geq 1$  y on dialysis, LVH, age  $\geq 60$  y, smoking, hypertension, and dyslipidemia

**2005 NKF/KDOQI Guidelines**<sup>26</sup>

- Noninvasive stress testing for all patients with diabetes, All patients with prior CAD (repeat annually);
- If prior PCI, repeat annually;
- If prior CABG, repeat after first 3 y and then every annually;
- Repeat every 24 mo in “high-risk” nondiabetic patients defined as  $\geq 2$  traditional risk factors (known history of CAD, LVEF  $\leq 40\%$ , Peripheral vascular disease)

**2001 AST Guidelines**<sup>27</sup>

- Noninvasive stress testing for “high risk” patients defined as diabetes, history of ischemic heart disease, or  $\geq 2$  risk factors
- Coronary angiography for patients with a positive stress test
- Revascularization for patients with critical coronary lesions

**2000 European Best Practice Guidelines**<sup>28</sup>

- Thallium scanning for patients with history of myocardial infarction or “high-risk” clinical features
- Coronary angiography recommended if thallium scanning positive
- Revascularization if lesions are suitable

LVH = left ventricular hypertrophy; CAD = coronary artery disease; PCI = percutaneous coronary intervention; CABG = coronary artery bypass graft; LVEF = left ventricular ejection fraction

**Evidence Review Table 2.** Studies examining prevalence of coronary artery disease in patients with end stage renal disease

| Reference                          | Population                                                      | Patient number | Study design  | Intervention (coronary artery disease definition) | Coronary artery disease prevalence                  | Follow-up duration | Association with clinical events                                                                                      | Study quality |
|------------------------------------|-----------------------------------------------------------------|----------------|---------------|---------------------------------------------------|-----------------------------------------------------|--------------------|-----------------------------------------------------------------------------------------------------------------------|---------------|
| De Lima et al (2003) <sup>29</sup> | Kidney transplant candidates                                    | 106            | Prospective   | >70% stenosis in 1 or more arteries               | 1-,2-and 3-vessel CAD in 19%,16% 7%                 | 1, 2, and 4 years  | Unadjusted probability of MACE at was higher with angiographic CAD (p<0.001): 13%, 39%, and 46% versus 2%, 6%, and 6% | C             |
| Sharma et al (2005) <sup>30</sup>  | Kidney transplant candidates                                    | 125            | Prospective   | Severe >70%, moderate 50-70%, mild <50%           | Severe, moderate, and mild CAD in 29%, 14%, and 21% | 2 years            | Unadjusted 2-y survival lower with CAD (85% versus 100%; p=0.005)                                                     | C             |
| Gowdak et al (2007) <sup>31</sup>  | Kidney transplant candidates                                    | 301            | Prospective   | >70%                                              | 45% significant CAD                                 | 1.8 year median    | MACE higher (45% v 18%, p<0.001)                                                                                      | D             |
| Gowdak et al (2007) <sup>32</sup>  | Kidney transplant candidates                                    | 288            | Prospective   | >70%                                              | 43% significant CAD                                 |                    | MACE higher in nondiabetic (HR 4.3, 95% CI 2.4-7.9; p<0.001). No difference in diabetics                              | C             |
| Hage et al (2007) <sup>33</sup>    | Kidney transplant candidates, positive stress test or known CAD | 260            | Retrospective | >50% narrowing, LAD considered 2-vessel disease   | 1,2,3 vessel CAD in 16,13 and 33%                   | 2 year             | Presence and severity of CAD not associated with survival                                                             | C             |
| Hickson et al (2008) <sup>34</sup> | Kidney transplant candidates                                    | 132            | Retrospective | Mild <50%, moderate 50-70%, severe >70%           | Mild 25%, moderate 10%, severe 56%                  | 6 months           | Severity not associated with survival                                                                                 | C             |

CAD = coronary artery disease; MACE = major adverse cardiac events; HR = hazard ratio; CI = confidence intervals; LAD = left anterior descending

**Table 3:** Accuracy of noninvasive testing for detection of coronary artery stenosis in end-stage renal disease patients

| Reference                               | Study population                                                                                      | Patient number | Stress test                            | Endpoint:<br>Coronary stenosis | Endpoint<br>prevalence | Sensitivity | Specificity | PPV  | NPV  |
|-----------------------------------------|-------------------------------------------------------------------------------------------------------|----------------|----------------------------------------|--------------------------------|------------------------|-------------|-------------|------|------|
| de Lima et al.<br>(2003) <sup>29</sup>  | 100% KT candidates                                                                                    | 89             | DSE                                    | CAS $\geq$ 70%                 | 0.38                   | 0.44        | 0.87        | 0.53 | 0.60 |
| Sharma et al.<br>(2005) <sup>30</sup>   | 100% KT candidates<br>Mean age 52 $\pm$ 12 years<br>39% had diabetes mellitus<br>55% were on dialysis | 125            | DSE                                    | CAS >70%                       | 0.29                   | 0.89        | 0.94        | 0.86 | 0.95 |
| Ferreira et al.<br>(2007) <sup>35</sup> | 100% KT candidates<br>Mean age 52 $\pm$ 9 years<br>27% had diabetic<br>nephropathy                    | 148            | Dobutamine/tropine<br>echocardiography | CAS >50%                       |                        | 0.53        | 0.87        |      |      |

PPV = positive predictive value; NPV = negative predictive value; KT = kidney transplant; SPECT = single-photon emission computed tomography; DES = dobutamine stress echocardiograph; CAS = coronary artery stenosis

## References

1. Huang HD, Alam M, Hamzeh I, *et al.* Patients with severe chronic kidney disease benefit from early revascularization after acute coronary syndrome. *Int J Cardiol.* 2013 Oct 9;168(4):3741-6
2. Szummer K, Lundman P, Jacobson SH, *et al.* Influence of renal function on the effects of early revascularization in non-ST-elevation myocardial infarction: data from the Swedish Web-System for Enhancement and Development of Evidence-Based Care in Heart Disease Evaluated According to Recommended Therapies (SWEDEHEART). *Circulation* 2009;120:851-8.
3. UK Renal Association. Cardiovascular Disease in CKD.[ Available online at <http://www.renal.org/guidelines/modules/cardiovascular-disease-in-ckd> ; accessed 10 Feb 2014]
4. Lentine KL, Costa SP, Weir MR, *et al.* Cardiac disease evaluation and management among kidney and liver transplantation candidates: a scientific statement from the American Heart Association and the American College of Cardiology Foundation. *J Am Coll Cardiol* 2012;60:434-80.
5. Workgroup KD. K/DOQI clinical practice guidelines for cardiovascular disease in dialysis patients. *Am J Kidney Dis* 2005; 45:S1-153.
6. Sosnov J, Lessard D, Goldberg RJ, Yarzebski J, Gore JM. Differential symptoms of acute myocardial infarction in patients with kidney disease: a community-wide perspective. *Am J Kidney Dis* 2006;47:378-84.
7. Lee JE, Lee YK, Choi EJ, Nam JS, Choi BW, Kim BS. Usefulness of multidetector row computed tomography for predicting cardiac events in asymptomatic chronic kidney disease patients at the initiation of renal replacement therapy. *Scient World J* 2013;2013:916354.
8. Braun WE, Phillips DF, Vidt DG, *et al.* Coronary artery disease in 100 diabetics with end-stage renal failure. *Transplant Proc* 1984;16:603-7.
9. Koch M, Gradaus F, Schoebel FC, Leschke M, Grabensee B. Relevance of conventional cardiovascular risk factors for the prediction of coronary artery disease in diabetic patients on renal replacement therapy. *Nephrol Dial Transplant* 1997;12:1187-91.
10. McCullough PA. Transplantation: Coronary angiography prior to renal transplantation. *Nat Rev Nephrol* 2010;6:136-7.
11. Iwasaki M, Joki N, Tanaka Y, *et al.* Declining Prevalence of Coronary Artery Disease in Incident Dialysis Patients Over the Past Two Decades. *J Atheroscler Thromb*; 2014. 21(6):593-604
12. Andronesi A, Iliuta L, Patruleasa M, *et al.* Predictive Factors for Coronary Artery Disease among Peritoneal Dialysis Patients without Diabetic Nephropathy. *Maedica* 2012; 7:227-35.
13. Wang IK, Kung PT, Kuo WY, *et al.* Impact of dialysis modality on the survival of end-stage renal disease patients with or without cardiovascular disease. *J Nephrol* 2013;26:331-41.
14. Almeshmi A, Broce M, Wetmore JB. Silent myocardial ischemia is more prevalent in CKD patients undergoing multi-vessel coronary angioplasty (abstr). *J Am Soc Nephrol* 2009; 20 Suppl:370A.
15. Fleisher LA, Beckman JA, Brown KA, *et al.* ACC/AHA 2007 Guidelines on Perioperative Cardiovascular Evaluation and Care for Noncardiac Surgery: Executive Summary: A Report of the American College of Cardiology/American Heart Association Task Force on Practice Guidelines (Writing Committee to Revise the 2002 Guidelines on Perioperative Cardiovascular Evaluation for Noncardiac Surgery) Developed in Collaboration With the American Society of Echocardiography, American Society of Nuclear Cardiology, Heart Rhythm Society, Society of Cardiovascular Anesthesiologists, Society for Cardiovascular Angiography and Interventions, Society for Vascular Medicine and Biology, and Society for Vascular Surgery. *J Am Coll Cardiol* 2007; 50:1707-32.
16. Reilly DF, McNeely MJ, Doerner D, *et al.* Self-reported exercise tolerance and the risk of serious perioperative complications. *Arch Intern Med* 1999;159:2185-92.
17. Rabbat CG, Treleaven DJ, Russell JD, Ludwin D, Cook DJ. Prognostic value of myocardial perfusion studies in patients with end-stage renal disease assessed for kidney or kidney-pancreas transplantation: a meta-analysis. *J Am Soc Nephrol* 2003;14:431-9.
18. Bergeron S, Hillis GS, Haugen EN, Oh JK, Bailey KR, Pellikka PA. Prognostic value of dobutamine stress echocardiography in patients with chronic kidney disease. *Am Heart J* 2007; 153:385-91.
19. Stack AG, Neylon AM, Abdalla AA, *et al.* Declining mortality rates despite increases in clinical coronary artery disease among US dialysis patients: a national registry study. *Am J Nephrol* 2013; 38:66-74.
20. Fuster V, Stein B, Ambrose JA, Badimon L, Badimon JJ, Chesebro JH. Atherosclerotic plaque rupture and thrombosis. Evolving concepts. *Circulation* 1990; 82:II47-59.
21. Cozzolino M, Biondi ML, Galassi A, Cusi D, Brancaccio D, Gallieni M. Vascular calcification and cardiovascular outcome in dialysis patients: the role of gene polymorphisms. *Blood Purif* 2010;29:347-51.
22. Abbud-Filho M, Adams PL, Alberu J, *et al.* A report of the Lisbon Conference on the care of the kidney transplant recipient. *Transplantation* 2007; 83:S1-22.

23. Friedman SE, Palac RT, Zlotnick DM, Chobanian MC, Costa SP. A call to action: variability in guidelines for cardiac evaluation before renal transplantation. *Clin J Am Soc Nephrol* 2011; 6:1185-91.
24. Hachamovitch R, Hayes S, Friedman JD, *et al.* Determinants of risk and its temporal variation in patients with normal stress myocardial perfusion scans: what is the warranty period of a normal scan? *J Am Coll Cardiol* 2003; 41:1329-40.
25. Hakeem A, Bhatti S, Dillie KS, *et al.* Predictive value of myocardial perfusion single-photon emission computed tomography and the impact of renal function on cardiac death. *Circulation* 2008;118:2540-9.
26. K/DOQI Workgroup. K/DOQI clinical practice guidelines for cardiovascular disease in dialysis patients. *Am J Kidney Dis* 2005;45 Suppl:S1–153.
27. Kasiske BL, Cangro CB, Hariharan S, *et al.* The evaluation of renal transplantation candidates: clinical practice guidelines. *Am J Transplant* 2001;1 Suppl 2:3-95.
28. EBPG Expert Group on Renal Transplantation. European best practice guidelines for renal transplantation. Section I: evaluation, selection and preparation of the potential transplant recipient. I.5. Risk factors/relative contra-indications. *Nephrol Dial Transplant* 2000;15 Suppl:3–38.
29. De Lima JJ, Sabbaga E, Vieira ML, *et al.* Coronary angiography is the best predictor of events in renal transplant candidates compared with noninvasive testing. *Hypertension* 2003;42:263-8.
30. Sharma R, Pellerin D, Gaze DC, *et al.* Dobutamine stress echocardiography and the resting but not exercise electrocardiograph predict severe coronary artery disease in renal transplant candidates. *Nephrol Dial Transplant* 2005;20:2207-14.
31. Gowdak LH, de Paula FJ, Cesar LA, *et al.* Screening for significant coronary artery disease in high-risk renal transplant candidates. *Coro Artery Dis* 2007;18:553-8.
32. Gowdak LH, de Paula FJ, Cesar LA, *et al.* Diabetes and coronary artery disease impose similar cardiovascular morbidity and mortality on renal transplant candidates. *Nephrol Dial Transplant* 2007;22:1456-61.
33. Hage FG, Smalheiser S, Zoghbi GJ, *et al.* Predictors of survival in patients with end-stage renal disease evaluated for kidney transplantation. *Am J Cardiol* 2007;100:1020-5.
34. Hickson LJ, Cosio FG, El-Zoghby ZM, *et al.* Survival of patients on the kidney transplant wait list: relationship to cardiac troponin T. *Am J transplant* 2008; 8:2352-9.
35. Ferreira PA, de Lima VC, Campos Filho O, *et al.* Feasibility, safety and accuracy of dobutamine/atropine stress echocardiography for the detection of coronary artery disease in renal transplant candidates. *Arquivos brasileiros de cardiologia* 2007;88:45-51.

### **Guideline 3.1.5: We suggest peritoneal dialysis patients with ischemic heart disease be treated with antiplatelet agents. (2D)**

#### **Rationale**

Medical management of CAD, both ACS and chronic stable CAD, has been extensively studied in the general population leading to evidence-based clinical practice guidelines. Landmark trials have firmly established roles for reperfusion and primary percutaneous coronary intervention (PCI), antiplatelet and anticoagulant therapies, beta blocker therapy, and angiotensin-converting enzyme inhibitor (ACEI) or angiotensin receptor blocker (ARB) therapy for ACS in the general population. Unfortunately, the majority of these trials have excluded patients with moderate-to-severe renal impairment have, leading to unanswered concerns about efficacy and safety, and consequently significant underuse of these therapeutic options in CKD patients, including those on PD [1-4]. In a prospective cohort study examining the effect of aspirin, beta blocker, ACEI and statin use on 12-month mortality in CKD patients with heart failure and angiographically proven CAD [5], aspirin use was significantly lower amongst CKD patients (including 466 dialysis patients) and those on aspirin had a lower 12-month mortality (OR 0.69, 95% CI: 0.57 - 0.85).

#### **Efficacy**

There are no RCTs specifically examining the efficacy of aspirin alone or clopidogrel alone for the management of chronic stable CAD in PD patients.



The ATC (Antithrombotic Trialists' Collaboration) meta-analysis of randomized trials of anti-platelet therapy for the prevention of death, MI and stroke in high risk patients [6] included 2632 HD patients in 14 trials of anti-platelet agents used for maintenance of access patency. Anti-platelet therapy was associated with a 41% reduction in risk of serious vascular events. In contrast, aspirin prescription was associated with an increased risk for any cardiac event (RR 1.08, 95% CI 1.02, 1.14) and MI (RR 1.21 95% CI 1.06, 1.38) but a reduced risk for stroke (RR 0.82, 95% CI 0.69, 0.98) in the DOPPS (Dialysis Outcomes and Practice Patterns Study). [7] In an observational study of 41,425 HD patients, aspirin as well as clopidogrel prescription was associated with an increased risk of all-cause mortality (RR 1.06, 95% CI 1.01, 1.11 and RR 1.24, 95% CI 1.13, 1.35 respectively) [8].

In a post-hoc analysis of HOT (Hypertension Optimal Treatment) study[9], the addition of low dose aspirin (75 mg/day) to antihypertensive treatment reduced major cardiovascular events in 18,790 hypertensive patients with CKD (RR 0.595, 95% CI 0.387, 0.913), with no significant increase in major bleeds (RR 1.50, 95% CI 0.67, 3.34). This effectively translates to preventing 12.9 events at the cost of 2 bleeds per 1000 patient years of aspirin treatment [10]. Another post-hoc analysis of the same study showed that aspirin therapy produced greater reduction in major cardiovascular (CV) events than in patients with normal eGFR, with a RR of 0.34 (95% CI 0.17, 0.67) for patients with a baseline eGFR of <45 mL/min. [11] Major bleeding was not significantly different in the lower eGFR group. By this analysis, treating 1000 patients for 3.8 years would prevent 76 events at the cost of 27 major bleeds.

The efficacy and safety of clopidogrel has not been examined in dialysis patients. In a RCT for prevention arteriovenous fistula failure in HD patients, clopidogrel use alone was not associated with any reduction in atherosclerotic events over a 6 month follow up [12].

The efficacy of adding clopidogrel to aspirin for ACS in CKD was examined in post-hoc analyses of 2 major studies [13,14]. In the CURE study (Clopidogrel in Unstable Angina to Prevent Recurrent Events), addition of clopidogrel to aspirin for unstable angina was associated with reduced risk of cardiovascular death, non-fatal MI or stroke at 1 year compared to aspirin and placebo [13]. The risk reduction was dependent on eGFR, but the confidence interval just crossed 1 in the lowest eGFR tertile (<64 mL/min). In CREDO (Clopidogrel for Reduction of Events During Observation) study, addition of clopidogrel to aspirin in patients undergoing percutaneous coronary intervention did not show any benefit in lower eGFR tertiles. Recent data suggest that some of this lack of activity could be explained by variable clopidogrel bioavailability in advanced CKD [15]. The newer faster acting thienopyridine, prasugrel, shows less variability, but needs to be tested in CKD patients.

The effect of aspirin therapy after MI has been examined in registry data.[16,17] Combined aspirin and beta blocker use was associated with a lower in-hospital mortality rate amongst 1724 patients, 47 of whom were on dialysis (RRR 78% for dialysis patients). In another study, use of aspirin, beta blocker and ACEI therapy post-acute MI was associated with a lower RR (RR 0.64, 95% CI: 0.50 - 0.80) of 30-day mortality in 1025 dialysis patients.

In another registry analysis [18], clopidogrel reduced death and primary endpoints (combined outcomes of death, non-fatal MI and stroke at 12 months) for CKD population (HR 0.35, 95% CI: 0.21–0.61 and HR 0.48, 95% CI: 0.30–0.77, respectively). Patients with clopidogrel(-)/CKD(-), clopidogrel(+)/CKD(+) and clopidogrel(-)/CKD(+) had 2.4, 3.0 and 10.4 fold risk to have primary endpoints compared with those receiving clopidogrel treatment without CKD (all p<0.01). Clopidogrel treatment was not associated with increased in-hospital bleeding risk in CKD population.

## Safety

The safety of aspirin and clopidogrel combination has not been examined in PD patients. In a trial of prevention of arteriovenous graft thrombosis in HD patients [19], the combination was associated with increased risk of major bleeding (HR 1.98 95% CI 1.19, 3.28). In a systematic review of 16 studies, combination anti-platelet therapy (clopidogrel and high dose aspirin; and aspirin with ticlopidine, sulfapyrazone, dipyridole or warfarin) increased the risk for major bleeding in HD patients [20]. Methodological weaknesses, however, limited the conclusions from this review.

The UK-HARP-1 (Heart and Renal Protection) study [21] examined the safety of simvastatin and aspirin in CKD patients. Treatment with 100 mg/day of aspirin was not associated with an excess of major bleeds, albeit there was a 3-fold excess of minor bleeds (RR 2.81, 95% CI 1.49, 5.28). The ATC meta-analysis and DOPPS also did not show increased bleeding risk with anti-platelet therapy in dialysis patients. Both CURE and CREDO studies did not show significant increase in bleeding risk with clopidogrel use. However, disaggregated safety data are not available for the dialysis population.

## References

1. Wright RS, *et al.* Acute myocardial infarction and renal dysfunction: a high-risk combination. *Ann Intern Med* 2002; 137(7): 563-70.
2. Fox CS, *et al.* Use of evidence-based therapies in short-term outcomes of ST-segment elevation myocardial infarction and non-ST-segment elevation myocardial infarction in patients with chronic kidney disease: a report from the National Cardiovascular Data Acute Coronary Treatment and Intervention Outcomes Network registry. *Circulation* 2010; 121(3): 357-65.
3. Reddan DN, *et al.* Renal function, concomitant medication use and outcomes following acute coronary syndromes. *Nephrol Dial Transplant* 2005; 20(10): 2105-12.
4. Shlipak MG, *et al.* Association of renal insufficiency with treatment and outcomes after myocardial infarction in elderly patients. *Ann Int Med* 2002; 137(7): 555-62.
5. Ezekowitz J, *et al.* The association among renal insufficiency, pharmacotherapy, and outcomes in 6,427 patients with heart failure and coronary artery disease. *J Am Coll Cardiol* 2004; 44(8): 1587-92.
6. Antithrombotic Trialists Collaboration, Collaborative meta-analysis of randomised trials of antiplatelet therapy for prevention of death, myocardial infarction, and stroke in high risk patients. *BMJ*, 2002. 324(7329): p. 71-86.
7. Ethier J, *et al.* Aspirin prescription and outcomes in hemodialysis patients: the Dialysis Outcomes and Practice Patterns Study (DOPPS). *Am J Kidney Dis* 2007; 50(4):602-11.
8. Chan KE, *et al.* Anticoagulant and antiplatelet usage associates with mortality among hemodialysis patients. *J Am Soc Nephrol* 2009; 20(4):872-81.
9. Hansson L, *et al.* Effects of intensive blood-pressure lowering and low-dose aspirin in patients with hypertension: principal results of the Hypertension Optimal Treatment (HOT) randomised trial. HOT Study Group. *Lancet* 1998; 351(9118):1755-62.
10. Zanchetti A, *et al.* Benefit and harm of low-dose aspirin in well-treated hypertensives at different baseline cardiovascular risk. *J Hypertension* 2002; 20(11): 2301-7.
11. Jardine MJ, *et al.* Aspirin is beneficial in hypertensive patients with chronic kidney disease: a post-hoc subgroup analysis of a randomized controlled trial. *J Am Coll Cardiol* 2010; 56(12):956-65.

12. Dember LM, *et al.* Effect of clopidogrel on early failure of arteriovenous fistulas for hemodialysis: a randomized controlled trial. *JAMA* 2008; 299(18):2164-71.
13. Keltai M, *et al.* Renal function and outcomes in acute coronary syndrome: impact of clopidogrel. *Eur J Cardiovasc Prev Rehabil* 2007; 14(2): 312-8.
14. Best PJM, *et al.* The efficacy and safety of short- and long-term dual antiplatelet therapy in patients with mild or moderate chronic kidney disease: results from the Clopidogrel for the Reduction of Events During Observation (CREDO) trial. *Am Heart J* 2008; 155(4):687-93.
15. Htun P, *et al.* Low responsiveness to clopidogrel increases risk among CKD patients undergoing coronary intervention. *Journal of the American Society of Nephrology*, 2011. 22(4): p. 627-33.
16. McCullough PA, *et al.* Benefits of aspirin and beta-blockade after myocardial infarction in patients with chronic kidney disease. *Am Heart J* 2002; 144(2): 226-32.
17. Berger AK, Duval S, and Krumholz HM. Aspirin, beta-blocker, and angiotensin-converting enzyme inhibitor therapy in patients with end-stage renal disease and an acute myocardial infarction. *J Am Coll Cardiol* 2003; 42(2):201-8.
18. Lin TH, Lai WT, Hsin HT, Li AH, Wang CL, *et al.* Effects of Clopidogrel on Mortality, Cardiovascular and Bleeding Outcomes in Patients with Chronic Kidney Disease - Data from Taiwan Acute Coronary Syndrome Full Spectrum Registry. *PLoS One* 2013; 8(8): e71917.
19. Kaufman JS, *et al.* Randomized controlled trial of clopidogrel plus aspirin to prevent hemodialysis access graft thrombosis. *J Am Soc Nephrol* 2003; 14(9): 2313-21.
20. Hiremath S, *et al.* Antiplatelet medications in hemodialysis patients: a systematic review of bleeding rates. *Clin J Am Soc Nephrol* 2009; 4(8):1347-55.
21. Baigent C *et al.* First United Kingdom Heart and Renal Protection (UK-HARP-I) study: biochemical efficacy and safety of simvastatin and safety of low-dose aspirin in chronic kidney disease. *Am J Kidney Dis* 2005; 45(3):473-84.

## Revascularization in CAD

Although rates of MI and stroke are higher in patients with CKD than in the general population, subjects with CKD have been commonly excluded from clinical trials involving either stable atherosclerosis or ACS<sup>1</sup>. As a result, evidence for specific treatment modalities in this population is limited. It has been shown that all types of therapy for CAD are safe in subjects with CKD. Patients with advanced CKD are more likely to present with acute MI than with stable angina.<sup>2</sup> CKD patients who present with ACS have more extensive CAD; have higher risk for reinfarction, heart failure, and death; have more atypical and delayed presentations; and are less likely to receive evidence-based therapy than are patients without CKD<sup>3</sup>. Out of 109,169 Medicare patients with MI, fewer patients with CKD received thrombolytic therapy, and those with the worst kidney disease waited the longest for therapy<sup>4</sup>, despite the adjusted odds ratio (OR) for bleeding events in ESRD being lower than in patients with normal kidney function (OR 1.84 vs 2.28, respectively). SWEDEHEART reported in 23,262 consecutive cases of NSTEMI, that the utilization of coronary angiography and revascularization decreased as eGFR declined.<sup>5</sup> Even though CKD are less likely to be offered coronary angiography in the setting of ACS, observational studies suggest they benefit from revascularization with a reduced mortality.<sup>6,7</sup> Wong *et al.*<sup>8</sup> showed a benefit with revascularization even in those with severe CKD.

## Modality of revascularization for PD patients with CAD (Evidence Review Table 4)

The most appropriate method of revascularization in dialysis patients remains a matter of debate<sup>9</sup>. Advances have been made in coronary artery bypass graft (CABG) surgery, with consequent reduction in operative morbidity and mortality<sup>10</sup>. CABG may be preferred over percutaneous coronary intervention (PCI) with left main disease or disease of left descending artery, although a recent randomized trial in the general population suggested that survival and major cardiovascular events were similar following PCI or CABG<sup>11</sup>, but the need for repeat revascularization was higher in patients receiving PCI<sup>12</sup>.

Indeed, there have been several randomized trials comparing CABG with PCI, including those with multivessel disease. However, none of the trials included patients on dialysis and so far no randomized trials comparing CABG versus PCI were conducted in the dialysis population. Recommendations for the general population may not simply be applicable to dialysis population as the morphology of coronary artery disease in dialysis patients was different from the general population. It is difficult to make evidence-based decisions for the management of coronary artery disease in patients who have severe kidney disease, since the risk/benefit ratio in this patient population differs significantly from that seen in patients with normal or mildly impaired kidney function.

A previous systematic review<sup>13</sup> examined whether CABG or PCI may be better in dialysis patients. They included 17 retrospective, observational studies from five countries with a total of 32,388 dialysis patients. In total, 15,175 patients underwent CABG, and 17,213 patients underwent PCI but drug-eluting stents were not used in any of the studies. With the exception of two studies, which each followed over 14,000 patients, other studies had small sample size including 25 to 452 patients. Importantly, the dialysis modality was not always reported. In this meta-analysis, patients receiving CABG were more likely to have multivessel CAD (85% versus 53%) and left main disease (14% versus 8%), reflecting selection bias inherent to the choice of intervention modality. Data on short-term 30 days in-hospital mortality showed a higher risk after CABG compared to PCI. The pooled absolute increase in short-term death with CABG compared with PCI was 5.2% (absolute rates 10.6% versus 5.4%). The unadjusted relative risk (RR) of short-term mortality was 1.91 (95% confidence interval [CI] 1.44 to 2.52;  $P < 0.001$ ) for CABG versus PCI. The long-term ( $\geq 1$  year) mortality was no different between CABG and PCI in 13 of the 16 studies, and 3 showed a lower risk of mortality after CABG compared to PCI. The overall cumulative mortality was 51.6% after CABG versus 59.5% after PCI (unadjusted RR 0.93, 95% CI 0.88 to 0.98;  $P = 0.01$ ). The point estimate of the risk of cardiac events was lower after CABG compared to PCI (20.3% versus 32.4%; absolute difference 12.1%; RR 0.50, 95% CI 0.37 to 0.68;  $P < 0.01$ ). However, none of the studies considered the competing event of death when examining cardiac events. MI (RR 0.62, 95% CI 0.51 to 0.75;  $P < 0.00001$ ) and need for revascularization (RR 0.21, 95% CI 0.13 to 0.35;  $P < 0.00001$ ) were lower after CABG compared to PCI. There were several confounders in the studies. As expected, individuals receiving CABG compared with those receiving PCI had important baseline differences, which were adjusted for only in four studies. In general, patients who received CABG had worse coronary anatomy but if these patients were too ill to undergo CABG, and received PCI, this could confound the results. The studies included surgery with or without cardiopulmonary bypass could also have a significant effect on the surgical results.

Using data from the United States Renal Data System, Chang et al<sup>14</sup> compared the results of CABG and PCI performed between 1997 and 2009 for multivessel disease in 21,981 maintenance dialysis patients. In addition to mortality, a composite of death or MI was examined as outcome of interest in their analysis. Over a median follow-up time of 1.7 years (interquartile range [IQR]=0.5–

3.6), CABG was associated with a lower risk of death (HR=0.87, 95% CI=0.84–0.90) and lower composite risk of death or MI (HR=0.88, 95% CI=0.86–0.91). Results were similar using a propensity score-matched cohort analysis. The benefit was maintained irrespective of age groups, gender, presence or absence of diabetes, dialysis vintage or modality (HD vs PD).

These findings were similar to two previous studies using data from the USRDS that included patients with single as well as multi-vessel disease. The first study<sup>15</sup> examined dialysis patients undergoing initial coronary revascularization between 1990 and 1995 and showed an 8% lower risk of death (CI=3%–14%) associated with CABG compared with PCI. The second study examined revascularizations between 1995 and 1998 and found a 20% lower risk of death with CABG (CI=16%–26%) versus PCI<sup>16</sup>.

Another meta-analysis<sup>17</sup> compared PCI using drug eluting stents (DES) versus bare metal stents (BMS) in seven nonrandomized controlled cohort studies with 869 dialysis patients (range, 54–204 patients) and relatively short follow-up duration (9–12 months, except in one study that followed patients for three years). There was no difference in the risk of all-cause mortality or MI. However, a significant reduction was observed in the incidence of target lesion/vessel revascularization (TLR/TVR) (odds ratio [OR], 0.55; CI: 0.39–0.79) and composite endpoint of death, TLR/TVR and recurrent MI (major adverse coronary events, MACE) (OR 0.54; CI: 0.40–0.73); and a trend towards lower OR for all-cause mortality (OR 0.68; CI: 0.45–1.01) was observed in the DES treated patients compared to BMS treated patients. No significant differences were noted between the groups in the relative or absolute risk of MI. The absolute risk reduction with DES use was -0.09 (CI: -0.14 to -0.04; numbers needed to treat [NNT] = 11) for TLR/TVR, -0.13 (CI -0.19 to -0.07; NNT 8) for MACE. The procedural success with DES was similar to that encountered with BMS.

Two other studies, however, provided results different from this meta-analysis. In a small retrospective review<sup>18</sup> that reported the outcome of 58 dialysis patients who underwent CABG and 67 who received PCI with DESs, the overall survival rates at one, three, and five years were 84.2%, 64.7%, and 56.2% in CABG group and 88.2%, 75.5%, and 61.7% in DES group, respectively (p = 0.202). The rates of freedom from cardiac-related events at one, three, and five years were 76.6%, 68.1%, and 48.6%, and 63.0%, 31.4%, and 0% in CABG and DES groups (p < 0.001), respectively, including seven (10%) late thrombosis in the DES group. Although the risk-adjusted analysis showed no significant difference for overall and cardiac death rates, the rates of cardiac-related events and graft/stent failure were significantly higher in the DES group. However, sample size of this study was regarded small and the study was retrospective design. In another study<sup>19</sup>, 29 HD patients underwent CABG, and 75 patients underwent PCI with DES: the 2-year survival rate was 84.0% for CABG and 67.6% for PCI (p 0.0271). The cardiac death-free curve at 2 years was 100% for CABG and 84.1% for PCI (p 0.0122). The major adverse cardiac events-free rate at 2 years was 75.8% for CABG and 31.5% for PCI (p < 0.0001). The DES carried a higher risk for sudden death, which might be associated with stent thrombosis.

In another meta-analysis of 5 non-randomized studies, comprising 641 patients (279 DES, and 362 BMS) with follow-up between 9 and 12 months, in-hospital clinical outcomes were similar between the two groups. At follow-up, there was a trend towards lower TLR (OR 0.50, CI, 0.27-0.93, P=0.011) and trend towards decreased late luminal loss (P=0.09) in patients treated with DES. There was no difference in the rates of all-cause mortality (OR 0.66, CI, 0.40-1.08, P=0.070), and MI (OR 1.35, CI 0.52-3.52, P=0.53) between the two groups.

In light of these results, it is not possible to recommend DES over BMS. In addition, several types of DESs are now available, and it remains uncertain whether one type of DES may be more

effective than the other [Evidence Review Table 5]. There are no prospective randomized trials currently underway according to a recent search of the Clinical Trials database<sup>20</sup>.

Until randomized data become available for patients receiving dialysis including those on PD, the workgroup felt that strong recommendations on the modality of revascularization cannot be made in PD patients. The workgroup suggests that the modality of revascularization be individualized and selected on the basis of the extent and severity of lesions, assessment of risk versus benefit in individual patients and availability of expertise.

## PD patients with acute coronary syndrome

Patients with CKD who develop ACS are less likely to receive guideline recommended therapies including coronary angiography or revascularization. This treatment disparity is likely caused by concerns for higher procedural complications, increased bleeding risk with long-term anti-platelet therapy, increased likelihood of restenosis and need for repeat revascularization and hastening the loss of residual renal function. The benefits in terms of reducing MI and cardiovascular morbidity with an initial invasive strategy followed by early revascularization in ACS patients has been shown in RCTs [Evidence Review Table 6]. However, majority of the studies have excluded patients with advanced CKD. The number of CKD patients included in the registries were small. In a recent analysis of 23,262 consecutive non-ST-elevation MI patients in the SWEDEHEART registry<sup>5</sup>, significantly fewer patients at lower levels of renal function were treated invasively (CKD 1:62%; 2: 55%; 3:36%; 4: 14%; and 5: 15%;  $P<0.001$ ). The overall 1-year mortality, however, was 36% lower (hazard ratio 0.64, 95% confidence interval 0.56 to 0.73,  $P<0.001$ ) with an invasive strategy. Furthermore, while the magnitude of survival difference was similar in normal renal function to-moderately impaired renal function groups, the benefit diminished with decreased renal function, with no difference in mortality in patients on dialysis (hazard ratio 1.61, 95% confidence interval 0.84 to 3.09,  $P=0.15$ ). In the most recent 2012 update of the American College of Cardiology Foundation/American

Heart Association (ACCF/AHA) guidelines for management of unstable angina/ non-ST-segment elevation myocardial infarction (UA/NSTEMI), the role of early revascularization in the CKD subpopulation with ACS was considered uncertain and deemed an important of research and future investigation<sup>21</sup>.

In a recent meta-analysis that included 7 reports enrolling 23,234 patients, of whom 6276 received early revascularization vs. 16,958 received initial medical therapy, early revascularization was associated with a significant reduction in 1-year mortality (OR = 0.46, 95% CI 0.26–0.82,  $P = 0.008$ ) among ACS patients with estimated GFR < 60 mL/min/1.73 m<sup>2</sup>. The mortality reduction with early revascularization occurred upfront (short term mortality OR = 0.69, 95% CI 0.56–0.87,  $P = 0.001$ ) and persisted at 3 years (OR = 0.54, 95% CI 0.31–0.96,  $P = 0.037$ ), and was evident across all CKD stages (including dialysis patients), and was independent of the influence of any single study. Among those with ESRD, there was 40% reduction in the odds of 1-year mortality. The magnitude of reduction in mortality with early revascularization, however, diminished with worsening degree of CKD<sup>22</sup>. It is important to note, however, that patients with ESRD derived more survival benefit in terms of absolute risk reduction in 1-year mortality with early revascularization compared to the group with at least moderate CKD (21.3% vs. 16.6%). This implies that even though hazards for death are inversely related to renal function in those with ACS, the benefit- of early coronary revascularization is incremental with worsening renal disease severity. Thus, given the current lack of randomized controlled trials and high degree of uncertainty of risk versus benefits for early revascularization in dialysis patients, the work group suggest PD patients who develop ACS be referred promptly to cardiologists and be assessed for suitability of early revascularization and the recommendation was ungraded. We felt that this is an area that requires further research and randomized trials for confirmation.

**Evidence Review Table 4:** Studies that examined coronary artery bypass graft with percutaneous angioplasty and/or stenting

| Reference                         | Population       | Patient number              | Study design                    | Intervention                  | Outcome    | Duration of follow up | Results                                                                                                                                                                                                                                                                                                                                                                                               | Study quality |
|-----------------------------------|------------------|-----------------------------|---------------------------------|-------------------------------|------------|-----------------------|-------------------------------------------------------------------------------------------------------------------------------------------------------------------------------------------------------------------------------------------------------------------------------------------------------------------------------------------------------------------------------------------------------|---------------|
| Chen et al 2013 <sup>23</sup>     | CKD              | 28 studies, 38,740 patients | Meta-analysis                   | PCI vs CABG                   | Mortality  | 12–96 months          | PCI group had lower short-term mortality (OR 0.55, 95% CI 0.41 to 0.73, P b 0.01), higher long-term all-cause mortality (OR 1.29, 95% CI 1.23 to 1.35, P b 0.01), higher cardiac mortality (OR 1.08, 95% CI 1.01 to 1.15, P b 0.05), higher incidence of late myocardial infarction (OR 1.78, 95% CI 1.65 to 1.91, P b 0.01) and recurring revascularization (OR 2.94, 95%CI 2.15 to 4.01, P b 0.01). | B             |
| Chang et al 2013 <sup>24</sup>    | Non dialysis CKD |                             | Propensity score matched cohort | CABG vs PCI                   | Mortality  | ?                     | CABG lower adjusted rate of death than PCI: HR 0.81, 95% CI 0.68 to 1.00 for patients with eGFR ≥60; HR 0.73 (CI 0.56-0.95) for eGFR of 45 to 59; and HR 0.87 (CI 0.67-1.14) for eGFR <45                                                                                                                                                                                                             | B             |
| Shroff et al 2013 <sup>25</sup>   | Dialysis         | 23, 033                     | Registry                        | CABG vs stenting              | Mortality  | 5 years               | In-hospital mortality CABG patients 8.2%; all-cause survival at 1, 2, and 5 years was 70%, 57%, and 28%, for DES patients was 2.7%; 1-, 2-, and 5-year survival was 71%, 53%, and 24%, respectively. Survival higher for IMG HR 0.83; P<0.0001                                                                                                                                                        | C             |
| Chang et al 2012 <sup>14</sup>    | Dialysis         | 21,981                      | Retrospective comparison        | Multivessel CABG vs PCI       | Mortality  | 5 year                | CABG lower risks for death (HR=0.87, 95% CI=0.84-0.90) death+MI (HR=0.88, 95% CI=0.86-0.91).                                                                                                                                                                                                                                                                                                          | B             |
| Yeates et al 2012 <sup>26</sup>   | Dialysis         | 90                          | Observational                   | PCI, CABG and medical therapy | MACE       | ?                     | stenting and coronary bypass grafting had lower risks of an adverse outcome than best medical management                                                                                                                                                                                                                                                                                              | C             |
| Terazawa et al 2012 <sup>18</sup> | Dialysis         | 125                         | Retrospective comparison        | CABG vs PCI                   | Death/MACE | 5 years               | Similar survival at 1,3,5 years were 84.2%, 64.7%, and 56.2% in CABG group and 88.2%, 75.5%, and 61.7% in DES                                                                                                                                                                                                                                                                                         | C             |



|                                   |          |                             |                          |             |                |         |                                                                                                                                                                                                                                                                                                                                                                                                                                                                |   |
|-----------------------------------|----------|-----------------------------|--------------------------|-------------|----------------|---------|----------------------------------------------------------------------------------------------------------------------------------------------------------------------------------------------------------------------------------------------------------------------------------------------------------------------------------------------------------------------------------------------------------------------------------------------------------------|---|
|                                   |          |                             |                          |             |                |         | group, (p = 0.202). The rates of freedom from MACE at one, three, and five years were 76.6%, 68.1%, and 48.6%, and 63.0%, 31.4%, and 0% in CABG and DES groups (p < 0.001),                                                                                                                                                                                                                                                                                    |   |
| Ashrith et al 2010 <sup>27</sup>  | CKD      | 812                         | Retrospective analysis   | CABG vs DES | Death/MACE/TLR | 2 years | CABG lower mortality (HR 0.61, 95% CI 0.36 to 1.03; p = 0.06). 2-vessel CAD similar long-term mortality risk (HR 1.12, 95% confidence interval 0.52 to 2.34; p = 0.7)                                                                                                                                                                                                                                                                                          | C |
| Sunagawa et al 2009 <sup>19</sup> | HD       | 104                         | Retrospective comparison | CABG vs DES | Mortality      | 2 years | 2-year survival 84.0% for CABG and 67.6% for PCI (p = 0.0271). The cardiac death-free curve at 2 years was 100% for CABG and 84.1% for PCI (p = 0.0122). The MACE free rate at 2 years was 75.8% for CABG and 31.5% for PCI (p < 0.0001).                                                                                                                                                                                                                      | C |
| Manabe et al 2009 <sup>28</sup>   | HD       | 46                          | Comparative              | CABG vs PCI |                | 2 years | MACE-free survival (CABG: 85.9% vs. PCI: 37.1%; p = 0.001) and angina-free survival (CABG: 84.9% vs. PCI: 28.9%; p < 0.001) higher in the CABG                                                                                                                                                                                                                                                                                                                 | C |
| Nevis et al 2009 <sup>13</sup>    | Dialysis | 17 studies, 32,388 patients | Systematic review        | CABG vs PCI | Mortality      | 1 year  | 5.2% increase in short-term death with CABG compared with PCI was 5.2%. Relative risk (RR) of short-term mortality 1.91 (CI 1.44 to 2.52; P < 0.001). 2 y mortality lower after CABG (RR 0.93, 95% CI 0.88 to 0.98; P = 0.01). CV events were lower after CABG (RR 0.50, 95% CI 0.37 to 0.68; P < 0.01). MACE lower after CABG (myocardial infarction RR 0.62, 95% CI 0.51 to 0.75; P < 0.00001; revascularization RR 0.21, 95% CI 0.13 to 0.35; P < 0.00001). | B |
| Herzog et al 1999 <sup>15</sup>   | Dialysis | 14,306                      | Registry                 | CABG vs PCI | Mortality      | 2 years | In-hospital mortality was 5.4% for PTCA and 12.5% for CAB patients. After comorbidity adjustment, the relative risk of CAB surgery (vs. PTCA) performed 1990 to 1995 for all-cause death was 0.91 (95% CI, 0.86 to 0.97); cardiac death, 0.85 (95% CI, 0.78 to 0.92); myocardial                                                                                                                                                                               | C |

|                                 |          |        |          |                       |           |         |                                                                                                                                                                                                                                                                                                                                                                                                                                                                                                                                                                 |   |
|---------------------------------|----------|--------|----------|-----------------------|-----------|---------|-----------------------------------------------------------------------------------------------------------------------------------------------------------------------------------------------------------------------------------------------------------------------------------------------------------------------------------------------------------------------------------------------------------------------------------------------------------------------------------------------------------------------------------------------------------------|---|
|                                 |          |        |          |                       |           |         | infarction, 0.37 (95% CI, 0.32 to 0.43); and cardiac death or myocardial infarction 0.69 (95% CI, 0.64 to 0.74).                                                                                                                                                                                                                                                                                                                                                                                                                                                |   |
| Herzog et al 2002 <sup>16</sup> | Dialysis | 15,784 | Registry | CABG vs PTCA vs stent | Mortality | 2 years | The in-hospital mortality 8.6% for 6668 CABG patients, 6.4% for 4836 PTCA patients, and 4.1% for 4280 stent patients. The 2-year survival 56.4+/-1.4% for CABG patients, 48.2+/-1.5% for PTCA patients, and 48.4+/-2.0% for stent patients (P<0.0001). RR for CABG (versus PTCA) patients 0.80 (95% CI 0.76 to 0.84, P<0.0001) for all-cause death and 0.72 (95% CI 0.67 to 0.77, P<0.0001) for cardiac death. For stent (versus PTCA), RR was 0.94 (95% CI 0.88 to 0.99, P=0.03) for all-cause death and 0.92 (95% CI 0.85 to 0.99, P=0.04) for cardiac death. | B |

PCI = percutaneous intervention; CABG = coronary artery bypass grafting; PTCA = percutaneous transluminal angioplasty; DES = drug eluting stent; MACE = major adverse cardiac events; OR = odds ratio; CI = confidence interval; HR = hazard ratio; RR = relative risk

**Evidence Review Table 5:** Studies that examined different types of stents

| Reference                            | Population | Patient number | Study design             | Intervention                           | Outcome        | Duration of follow up | Results                                                                                                                           | Study quality |
|--------------------------------------|------------|----------------|--------------------------|----------------------------------------|----------------|-----------------------|-----------------------------------------------------------------------------------------------------------------------------------|---------------|
| Tsujita et al 2012 <sup>30</sup>     | HD         | 41             | Retrospective comparison | Sirolimus vs paclitaxel-eluting stents | TLR, mortality | 1 year                | TLR higher with SES (36.6 % vs. PES 15.8 %; P = 0.037) no difference in all-cause death, MI or MACE                               | C             |
| Ishii et al 2012 <sup>31</sup>       | HD         | 505            | Observational            | Bare vs drug eluting stent             | MACE/TLR       | 6 years               | DES lower rates of TLR beyond the 1-year follow-up after PCI (16.4% vs. 30.9%, P=0.019) and lower MACE (42.5% vs. 58.0%, P=0.036) | C             |
| Higashitani et al 2011 <sup>32</sup> | HD         | 54             | Retrospective comparison | Paclitaxel vs sirolimus-eluting stent  | Restenosis/TLR | 10 months             | Restenosis rate was lower in PES (13.6 vs. 39.5%; p = 0.034). TLR lower in PES (9.3 vs. 26.5%; p =                                | C             |

|                                      |          |             |                          |                                  |           |         |                                                                                                                                                                                                                                                                                      |   |
|--------------------------------------|----------|-------------|--------------------------|----------------------------------|-----------|---------|--------------------------------------------------------------------------------------------------------------------------------------------------------------------------------------------------------------------------------------------------------------------------------------|---|
|                                      |          |             |                          |                                  |           |         | 0.041)                                                                                                                                                                                                                                                                               |   |
| Charytan et al 2011 <sup>33</sup>    | CKD      | 1,749       | Registry                 | Drug-eluting or bare-metal stent | Death     | 2 years | 2-year risk-adjusted mortality, MI, and TLR 39.4% versus 37.4% (risk difference, 2.1%; 95% CI, -4.3 to 8.5; P = 0.5), 16.0% versus 19.0% (risk difference, -3.0%; 95% CI, -8.2 to 2.1; P = 0.3), and 13.0% versus 17.6% (risk difference, -4.6%; 95% CI, -9.5 to 0.3; P = 0.06)      | B |
| Abdel-Latif et al 2010 <sup>17</sup> | ESRD     | 869         | Meta-analysis            | BMS vs DES                       | TLR/MACE  | 2 years | DES-treated patients lower TLR/TVR (OR 0.55 CI: 0.39-0.79) and MACE (OR 0.54; CI: 0.40-0.73). ARR in TLR/TVR was -0.09 (CI: -0.14 to -0.04; NNT 11) and in MACE was -0.13 (CI: -0.19 to -0.07; NNT 8).                                                                               | B |
| Ichimoto et al 2010 <sup>34</sup>    | Dialysis | 107         | Retrospective comparison | BMS vs SES                       | Mortality | 1 year  | No difference in restenosis (30% versus 40%, P = 0.20), 3-year mortality (22.5% versus 22.2%, P = 0.75), myocardial infarction (3.8% versus 4.9%, P = 0.93), target lesion revascularization (24.7% versus 31.0%, P = 0.61), and stent thrombosis rates (3.8% versus 2.4%, P = 0.73) | C |
| El-Menyar et al 2010 <sup>3</sup>    | CKD      | 117 studies | Systematic review        | BMS vs DES                       | MACE      | ?       | No difference between DES and BMS                                                                                                                                                                                                                                                    | B |
| Rosenblum et al 2009 <sup>35</sup>   | CKD      | 6220        | Retrospective comparison | DES vs BMS                       | TLR       | 1 year  | TLR rates lower for DES in CrCl >60 (5 vs. 9.3%; p < 0.0001). No diff in CrCl <40 mL/min or on dialysis                                                                                                                                                                              | C |
| Yachi et al 2009 <sup>36</sup>       | HD       | 123         | Retrospective comparison | BMS vs SES                       | MACE      | ?       | In-stent lumen loss SES, 0.62 +/- 0.75 mm; BMS, 1.07 +/- 0.75 mm; P = 0.003. MACE lower SES, 0.62 +/- 0.75 mm; BMS, 1.07 +/- 0.75 mm; P = 0.003                                                                                                                                      | C |

|                                  |          |      |                          |            |            |          |                                                                                                                                                                                        |   |
|----------------------------------|----------|------|--------------------------|------------|------------|----------|----------------------------------------------------------------------------------------------------------------------------------------------------------------------------------------|---|
| Okada et al 2008 <sup>37</sup>   | Dialysis | 80   | Retrospective comparison | BMS vs SES | Mortality  | 1 years  | MACE 25.2% in SES and 38.2% in BMS (p=0.048). In multivariate analysis, SES independent predictor of MACE at 1 year after PCI (risk ratio 0.70, 95% CI 0.52-0.9, p=0.015)              | C |
| Ishio et al 2007 <sup>38</sup>   | Dialysis | 123  | Retrospective comparison | BMS vs SES | MACE       | 9 months | SES higher MLD (1.98+/-0.83 mm vs 1.50+/-0.78 mm, p<0.01). In-stent restenosis rate lower in SES (22% vs 40%, p=0.048). No difference for in-segment restenosis (31% vs 43%, p=0.3).   | C |
| Mishkel et al 2007 <sup>39</sup> | CKD      | 2758 | Retrospective analysis   | BMS vs DES | Death/MACE | 2 years  | GFR < 60 ml per minute remained a significant predictor of 2-year mortality (p < 0.001) and MACE (p < 0.001), but not TVR (p = 0.839)                                                  | C |
| Halkin et al 2006 <sup>40</sup>  | Dialysis | 74   | Retrospective analysis   | BMS vs DES | MACE       | 1 year   | DES associated with freedom from the composite MACE endpoint (HR = 0.24, 95% CI [0.10-0.60]; p = 0.002) and with a trend to lower all-cause mortality (HR = 0.40 [0.15-1.05]; p = 0.06 | C |
| Das et al 2006 <sup>41</sup>     | Dialysis | 89   | Retrospective comparison | BMS vs DES | TVR        | 9 months | Reduction in TVR (OR 0.07, 95% CI 0.006-0.844; p = 0.036); death, MI and TVR (OR 0.11, 95% CI 0.022-0.513; p = 0.005)                                                                  | C |

BMS = bare metal stents; DES = drug-eluting stent; SES = sirolimus-eluting stents; PES = paclitaxel-eluting stent; TLR = target lesion revascularization; TVR = target vessel revascularization; ARR = absolute risk reduction; PCI = percutaneous coronary intervention; MLD = minimum lumen diameter; MI = myocardial infarction; MACE = major adverse cardiac events; CKD = chronic kidney disease; ESRD = end stage renal disease; HD = hemodialysis; HR = hazard ratio; CI = confidence interval

**Evidence Review Table 6:** Studies that examined early revascularization or conservative therapy following acute coronary syndrome

| Reference                      | Population          | Patient number | Study design             | Intervention                                           | Outcome                        | Duration of follow up | Results                                                                                                                 | Study quality |
|--------------------------------|---------------------|----------------|--------------------------|--------------------------------------------------------|--------------------------------|-----------------------|-------------------------------------------------------------------------------------------------------------------------|---------------|
| Chu et al 2013 <sup>29</sup>   | CKD with NSTEMI-ACS | 834            | Retrospective comparison | Early invasive vs early conservative revascularization | MACE (CV death, MI and stroke) | 1,163.96 ± 19.99 days | CKD subjects receiving an EIS had the highest MACE, HF and DDA rate (all p < 0.019)                                     | C             |
| Huang et al 2013 <sup>22</sup> | ACS and CKD         | 23,234         | Meta-analysis            | Early revascularization vs medical therapy             | Mortality                      | 1 year                | Reduced 1-year mortality (OR=0.46, 95% CI 0.26-0.82, P=0.008), persisted at 3years (OR=0.54, 95% CI 0.31-0.96, P=0.037) | B             |

CKD = chronic kidney disease; ACS = acute coronary syndrome; NSTEMI = non-ST elevation; MACE = major adverse cardiac events; CKD = chronic kidney disease; CV = cardiovascular; MI = myocardial infarction; EIS = early invasive strategy; HF = heart failure; DDA = dialysis during admission; OR = odds ratio; CI = confidence interval

## References

1. Coca SG, Krumholz HM, Garg AX, Parikh CR. Underrepresentation of renal disease in randomized controlled trials of cardiovascular disease. *JAMA* 2006; 296:1377-84.
2. Go AS, Bansal N, Chandra M, et al. Chronic kidney disease and risk for presenting with acute myocardial infarction versus stable exertional angina in adults with coronary heart disease. *J Am Coll Cardiol* 2011; 58:1600-7.
3. El-Menyar A, Zubaid M, Sulaiman K, et al. In-hospital major clinical outcomes in patients with chronic renal insufficiency presenting with acute coronary syndrome: data from a Registry of 8176 patients. *Mayo Clin Pro* 2010; 85:332-40.
4. Antithrombotic Trialists C. Collaborative meta-analysis of randomised trials of antiplatelet therapy for prevention of death, myocardial infarction, and stroke in high risk patients. *BMJ* 2002;324:71-86.
5. Szummer K, Lundman P, Jacobson SH, et al. Influence of renal function on the effects of early revascularization in non-ST-elevation myocardial infarction: data from the Swedish Web-System for Enhancement and Development of Evidence-Based Care in Heart Disease Evaluated According to Recommended Therapies (SWEDEHEART). *Circulation* 2009;120:851-8.
6. Keeley EC, Kadakia R, Soman S, Borzak S, McCullough PA. Analysis of long-term survival after revascularization in patients with chronic kidney disease presenting with acute coronary syndromes. *Am J Cardiol* 2003; 92:509-14.
7. Medi C, Chew DP, Amerena J, et al. An invasive management strategy is associated with improved outcomes in high-risk acute coronary syndromes in patients with chronic kidney disease. *Int Med J* 2011; 41:743-50.
8. Wong JA, Goodman SG, Yan RT, et al. Temporal management patterns and outcomes of non-ST elevation acute coronary syndromes in patients with kidney dysfunction. *Eur Heart J* 2009;30:549-57.
9. Edwards NC, Steeds RP, Ferro CJ, Townend JN. The treatment of coronary artery disease in patients with chronic kidney disease. *QJM* 2006;99:723-36.
10. Reston JT, Tregear SJ, Turkelson CM. Meta-analysis of short-term and mid-term outcomes following off-pump coronary artery bypass grafting. *Ann Thorac Surg* 2003;76:1510-5.
11. Malenka DJ, Leavitt BJ, Hearne MJ, et al. Comparing long-term survival of patients with multivessel coronary disease after CABG or PCI: analysis of BARI-like patients in northern New England. *Circulation* 2005; 112:1371-6.
12. Rodriguez A, Rodriguez Alemparte M, Baldi J, et al. Coronary stenting versus coronary bypass surgery in patients with multiple vessel disease and significant proximal LAD stenosis: results from the ERACI II study. *Heart* 2003; 89:184-8.
13. Nevis IF, Mathew A, Novick RJ, et al. Optimal method of coronary revascularization in patients receiving dialysis: systematic review. *Clin J Am Soc Nephrol* 2009; 4:369-78.
14. Chang TI, Shilane D, Kazi DS, Montez-Rath ME, Hlatky MA, Winkelmayer WC. Multivessel coronary artery bypass grafting versus percutaneous coronary intervention in ESRD. *J Am Soc Nephrol* 2012; 23:2042-9.
15. Herzog CA, Ma JZ, Collins AJ. Long-term outcome of dialysis patients in the United States with coronary revascularization procedures. *Kidney Int* 1999;56:324-32.
16. Herzog CA, Ma JZ, Collins AJ. Comparative survival of dialysis patients in the United States after coronary angioplasty, coronary artery stenting, and coronary artery bypass surgery and impact of diabetes. *Circulation* 2002; 106:2207-11.

17. Abdel-Latif A, Mukherjee D, Mesgarzadeh P, Ziada KM. Drug-eluting stents in patients with end-stage renal disease: meta-analysis and systematic review of the literature. *Catheter Cardiovasc Interv* 2010;76:942-8.
18. Terazawa S, Tajima K, Takami Y, *et al*. Early and late outcomes of coronary artery bypass surgery versus percutaneous coronary intervention with drug-eluting stents for dialysis patients. *J Card Surg* 2012; 27:281-7.
19. Sunagawa G, Komiya T, Tamura N, Sakaguchi G, Kobayashi T, Murashita T. Coronary artery bypass surgery is superior to percutaneous coronary intervention with drug-eluting stents for patients with chronic renal failure on hemodialysis. *Ann Thorac Surg* 2010;89:1896-900; discussion 900.
20. Butman SM. It's not the dye, but the "die" in dialysis: which coronary revascularization strategy really is best? *Catheter Cardiovasc Interv* 2010;76:949-50.
21. Jneid H, Anderson JL, Wright RS, *et al*. 2012 ACCF/AHA focused update of the guideline for the management of patients with unstable angina/Non-ST-elevation myocardial infarction (updating the 2007 guideline and replacing the 2011 focused update): a report of the American College of Cardiology Foundation/American Heart Association Task Force on practice guidelines. *Circulation* 2012;126:875-910.
22. Huang HD, Alam M, Hamzeh I, *et al*. Patients with severe chronic kidney disease benefit from early revascularization after acute coronary syndrome. *Int J Cardiol* 2013;168(4):3741-6
23. Chen YY, Wang JF, Zhang YJ, Xie SL, Nie RQ. Optimal strategy of coronary revascularization in chronic kidney disease patients: a meta-analysis. *European journal of internal medicine* 2013;24:354-61.
24. Chang TI, Leong TK, Kazi DS, Lee HS, Hlatky MA, Go AS. Comparative effectiveness of coronary artery bypass grafting and percutaneous coronary intervention for multivessel coronary disease in a community-based population with chronic kidney disease. *Am Heart J* 2013;165:800-8, 8 e1-2.
25. Shroff GR, Solid CA, Herzog CA. Long-term survival and repeat coronary revascularization in dialysis patients after surgical and percutaneous coronary revascularization with drug-eluting and bare metal stents in the United States. *Circulation* 2013;127:1861-9.
26. Yeates A, Hawley C, Mundy J, Pinto N, Haluska B, Shah P. Treatment outcomes for ischemic heart disease in dialysis-dependent patients. *Asian Cardiovasc Thoracic Ann* 2012;20:281-91.
27. Ashrith G, Elayda MA, Wilson JM. Revascularization options in patients with chronic kidney disease. *Tex Heart Inst J / from the Texas Heart Institute of St Luke's Episcopal Hospital, Texas Children's Hospital* 2010;37:9-18.
28. Manabe S, Shimokawa T, Fukui T, *et al*. Coronary artery bypass surgery versus percutaneous coronary artery intervention in patients on chronic hemodialysis: does a drug-eluting stent have an impact on clinical outcome? *J Card Surg* 2009;24:234-9.
29. Chu CY, Su HM, Hsu PC, *et al*. Impact of chronic kidney disease in early invasive versus early conservative revascularization strategies in non-ST-segment elevation acute coronary syndromes: a population-based study from NHIRD of Taiwan. *Nephron Clin Pract* 2013;124:38-46.
30. Tsujita H, Hamazaki Y, Nishikura T, *et al*. Sirolimus-eluting stents versus paclitaxel-eluting stents for coronary intervention in patients with renal failure on hemodialysis. *Cardiovasc Intervent Therapeutics* 2013;28:9-15.
31. Ishii H, Toriyama T, Aoyama T, *et al*. Percutaneous coronary intervention with bare metal stent vs. drug-eluting stent in hemodialysis patients. *Circulation journal : official journal of the Japan Circ Soc* 2012;76:1609-15.
32. Higashitani M, Mori F, Yamada N, *et al*. Efficacy of paclitaxel-eluting stent implantation in hemodialysis patients. *Heart Vessels* 2011; 26:582-9.

33. Charytan DM, Varma MR, Silbaugh TS, Lovett AF, Normand SL, Mauri L. Long-term clinical outcomes following drug-eluting or bare-metal stent placement in patients with severely reduced GFR: Results of the Massachusetts Data Analysis Center (Mass-DAC) State Registry. *Am J Kidney Dis* 2011; 57:202-11.
34. Ichimoto E, Kobayashi Y, Iijima Y, Kuroda N, Kohno Y, Komuro I. Long-term clinical outcomes after sirolimus-eluting stent implantation in dialysis patients. *Intern Heart J* 2010; 51:92-7.
35. Rosenblum MA, Robbins MJ, Farkouh ME, Winston JA, Kim MC. Diminished benefits of drug-eluting stents versus bare metal stents in patients with severe renal insufficiency. *Nephron Clin Pract* 2009; 113:c198-202.
36. Yachi S, Tanabe K, Tanimoto S, *et al.* Clinical and angiographic outcomes following percutaneous coronary intervention with sirolimus-eluting stents versus bare-metal stents in hemodialysis patients. *Am J Kidney Dis* 2009; 54:299-306.
37. Okada T, Hayashi Y, Toyofuku M, *et al.* One-year clinical outcomes of dialysis patients after implantation with sirolimus-eluting coronary stents. *Circ J* 2008;72:1430-5.
38. Ishio N, Kobayashi Y, Takebayashi H, *et al.* Impact of drug-eluting stents on clinical and angiographic outcomes in dialysis patients. *Circulation journal* 2007;71:1525-9.
39. Mishkel GJ, Varghese JJ, Moore AL, Aguirre F, Markwell SJ, Shelton M. Short- and long-term clinical outcomes of coronary drug-eluting stent recipients presenting with chronic renal disease. *J Invasive Cardiol* 2007; 19:331-7.
40. Halkin A, Selzer F, Marroquin O, Laskey W, Detre K, Cohen H. Clinical outcomes following percutaneous coronary intervention with drug-eluting vs. bare-metal stents in dialysis patients. *J Invasive Cardiol* 2006;18:577-83
41. Das P, Moliterno DJ, Charnigo R, *et al.* Impact of drug-eluting stents on outcomes of patients with end-stage renal disease undergoing percutaneous coronary revascularization. *The Journal of invasive cardiology* 2006;18:405-8.



## **SECTION 2. LEFT VENTRICULAR HYPERTROPHY, LEFT VENTRICULAR DYSFUNCTION AND HEART FAILURE IN PERITONEAL DIALYSIS PATIENTS**

**Guideline 3.2.1: We suggest evaluation of left ventricular hypertrophy, dilatation, systolic and diastolic function, as well as cardiac valvular abnormalities including valvular calcification, using echocardiography in peritoneal dialysis patients after initiation of peritoneal dialysis and repeat if change in clinical status. (2C)**

### **Rationale**

Left ventricular hypertrophy (LVH) is a frequent complication in peritoneal dialysis (PD) patients. The prevalence has been estimated to range from 44% to over 90% in prevalent PD patients (1-11). The presence of LVH predicted an increased risk of all-cause and cardiovascular mortality in dialysis patients including PD (5,10). In addition, in prospective follow-up studies, LVH and systolic dysfunction have been shown to be independent predictors of heart failure in PD patients (12,13). A recent observational study reported a progressive increase in left atrial diameter and LV mass with increasing time on the transplant waiting list in dialysis patients (14). Similarly, an earlier study showed progression of LVH and worsening of systolic dysfunction in PD patients with increasing time on PD (3). Furthermore, increased left atrial diameter, LV mass index and worsening systolic function have been shown to predict an increase in mortality and cardiovascular events (14). Compared to patients who maintained a stable LV mass index, patients with greater progressive increases in LV mass index over time are associated with increased risk of mortality and cardiovascular events in dialysis patients (15). There are also data that regression of LVH was associated with improved cardiovascular outcomes in dialysis patients (16).

In a cohort of 254 asymptomatic dialysis patients, Zoccali and co-workers showed that the prevalence of systolic dysfunction, defined using endocardial fractional shortening, was 26% and increased to 48% when defined using midwall fractional shortening (17). Systolic dysfunction is a powerful predictor of mortality and adverse cardiovascular outcomes in dialysis patients (12,13,17). Another study by Yamada *et al* showed in a cohort of 1254 incident hemodialysis (HD) patients that 14.2% had reduced ejection fraction < 50%, which predicted cardiovascular mortality independent of other risk factors (18). Further deterioration in systolic dysfunction with time on dialysis has also been associated with a greater mortality and cardiovascular event risk (19). Systolic dysfunction, defined using ejection fraction < 50%, predicted an increased risk of sudden cardiac death in PD patients (20). Increased LV filling pressure defined non-invasively using the ratio of early transmitral inflow velocity (E) to tissue Doppler derived measure early diastolic mitral annular velocity (Em), as a marker of diastolic dysfunction, has been shown to provide additional predictive value for mortality and adverse cardiovascular outcomes beyond LV mass index, ejection fraction and other clinical and biochemical parameters in PD patients. In this study, 62% of the PD patients were noted to have elevated LV filling pressure (E/Em ratio >15), indicating a high prevalence of diastolic dysfunction (21). A number of other studies in HD patients also demonstrated similar prognostic value of E/Em ratio. Notably, E/Em ratio appeared to have stronger predictive value for cardiovascular events compared to other standard echocardiographic parameters (22,23).

These observational data provide an important rationale for assessing and regularly monitoring the degree of LVH, dilatation, systolic and diastolic function in PD patients. However, evidence demonstrating that regular assessment of cardiac status of dialysis patients using echocardiography guides further therapeutic strategies and impacts positively on survival and other outcomes is currently lacking in dialysis patients. Thus, the recommendation on regular

monitoring and evaluating cardiac status using echocardiography in PD patients was weak. [Evidence Review Table 1]

**Guideline 3.2.2: We suggest peritoneal dialysis patients with significantly impaired systolic function be evaluated for the presence of coronary artery disease. (2C)**

**Rationale**

Heart failure is one of the most frequent complications in dialysis patients, with an estimated prevalence ranging from 30-40% (13,24-26). In PD patients, the reported prevalence of heart failure is around 35% and is even higher (up to 60%) among patients with a background history of heart failure (12). The presence of heart failure is a powerful predictor of adverse clinical outcomes in dialysis patients. Data from the United States Renal Data System suggested that heart failure is a very frequent cause of hospitalization in dialysis patients and the mortality rate after heart failure was 83% at 3 years (27). The presence of heart failure at initiation of dialysis treatment not only increased the mortality risk within 90 days of dialysis initiation (28) but also increased risk of long-term mortality. The median survival of dialysis patients with baseline heart failure has been estimated to be around 36 months versus 62 months for those with no baseline heart failure (26). In addition, recurrent heart failure on dialysis is also associated with an increased mortality risk (29). Recent study showed that it may be important to further define the nature of heart failure in PD patients, namely whether it is heart failure with preserved or reduced ejection fraction as these two entities are associated with different long-term clinical outcomes. Heart failure with reduced ejection fraction had the worst prognosis in relation to subsequent risk of all-cause mortality, heart failure, cardiovascular death, and fatal and non-fatal cardiovascular events. Heart failure with preserved ejection fraction had better outcomes compared to those with reduced ejection fraction though was inferior when compared to patients with no heart failure at all. Patients with heart failure and reduced ejection fraction showed the highest prevalence of coronary artery disease (46%) compared to patients with heart failure but preserved ejection fraction (28%) and patients with no heart failure (10%) ( $P < 0.001$ ) (30). The presence of LV systolic dysfunction or clinically evident heart failure may reflect underlying coronary ischemia. Thus, the working group suggests PD patients with significant reduction in systolic function be referred to cardiologists for further evaluation to rule out significant coronary artery disease and this recommendation was ungraded.

**Guideline 3.2.3: We suggest peritoneal dialysis patients with left ventricular hypertrophy or heart failure be considered for treatment with an angiotensin converting enzyme inhibitor or angiotensin receptor blocker. (2D)**

**Rationale**

In uremic animal models, angiotensin converting enzyme inhibitor (ACEI) abrogates LVH and cardiomyocyte loss and ameliorates structural abnormalities of the heart and vasculature (31,32). Non-randomized studies in the 1990s showed that ACEI were associated with reduced cardiac hypertrophy in dialysis patients independent of a blood pressure lowering effect (33,34). A subsequent observational study reported a favorable association of ACEI with survival and cardiovascular outcomes in dialysis patients independent of its effect on pulse wave velocity and blood pressure (35). In a 3 year prospective randomized controlled trial (RCT) conducted in 332 HD patients with New York Heart Association (NYHA) Functional Class II and III heart failure and ejection fraction  $\leq 40\%$ , combined angiotensin receptor blocker (ARB) and ACEI significantly reduced LV end-diastolic diameter and improved ejection fraction compared to combined ACEI

and placebo treatment. The LV structural and functional parameters were secondary and not primary endpoints of the study (36). A recent meta-analysis including 6 RCTs with a total of 207 participants (123 HD and 84 PD patients) of which 107 patients received treatment with ARB versus 100 patients received non-ARB treatment (37). The ARB treated group showed greater regression in LV mass index than for the non-ARB group ( $P=0.002$ ) but no significant difference was observed in LV ejection fraction. In the subgroup analysis of HD ( $P=0.009$ ) and PD patients ( $P=0.03$ ), ARB treatment was associated with greater LV mass regression than non-ARB treatment. However, it is noteworthy that the sample size of individual trials in this systematic review was below 50 subjects. On the other hand, another placebo-controlled RCT comparing enalapril and simvastatin versus placebo in 107 dialysis patients (including both HD and PD) showed no significant difference in LV mass or dimensions between the two groups (38). Given the very limited evidence available in the dialysis population, the level of recommendation for using ACEI and ARB treatment in PD patients with LVH is therefore weak [Evidence Review Table 2].

Inhibition of the activated renin-angiotensin system by an ACEI (or ARB) has long been established as a standard therapy for the general population with heart failure (39) and has been shown to reverse LV dilatation in asymptomatic patients with LV systolic dysfunction (40) and confer survival benefit in different high risk populations including patients with heart failure, myocardial infarction (MI), diabetes with nephropathy, or strokes (41-45). Evidence Review Table 3 presents a summary of the clinical trials that examined the effects of ACEI or ARBs in dialysis patients in relation to hard outcomes. So far, no RCT has examined *de novo* or recurrent heart failure as the primary outcome. In the double-blind placebo-controlled RCT by Zannad *et al* (46) that examined the effect of fosinopril on cardiovascular events in 397 HD patients with LVH over 24 months, a 7% reduction in cardiovascular events was observed in the intention to treat analysis and was insignificant. A secondary per-protocol analysis suggested a trend towards benefit in the composite cardiovascular endpoint (of which 6.5% were heart failure hospitalization) with fosinopril treatment (adjusted relative risk = 0.79, 95% confidence intervals, 0.59-1.1  $P=0.099$ ). The study did not demonstrate survival benefit with an ACEI in HD patients. Another small open-labeled RCT in 80 HD patients showed that the ARB candesartan significantly reduced cardiovascular events (16.3% vs 45.9%) and mortality (0% vs 18.9%) compared to placebo. However, this study excluded patients with background symptomatic cardiac disease including heart failure (47). The 3 year prospective RCT by Cice *et al* demonstrated significant long-term survival and cardiovascular benefits as well as reduction in hospitalization for heart failure by combining an ACEI with an ARB in HD patients with class II-III heart failure and systolic dysfunction (36). There is so far no adequately powered RCT that examined hard outcomes in relation to the use of ACEI or ARBs in PD patients with heart failure. Given the rather limited evidence in HD patients and lack of evidence in PD patients, even though there are convincing data of benefit of ACEI or ARB in the general population, the strength of recommendation for the use of ACEI or ARB in PD patients with heart failure is weak [Evidence Review Table 3].

**Guideline 3.2.4: We suggest peritoneal dialysis patients with left ventricular hypertrophy, dilated cardiomyopathy, or systolic heart failure be considered for treatment with a beta blocker. (2C)**

#### **Rationale**

Cice *et al* examined the effects of carvedilol in a randomized placebo-controlled trial of 114 HD patients with dilated cardiomyopathy (48,49) (Table 4). Carvedilol showed a significant reduction in LV volumes with improved LV ejection fraction and NYHA functional class and the improvement was maintained up to 24 months follow-up. However, there are so far no randomized trials examining the effect of beta blockers in regressing LVH in PD patients.

Beta blockers are the standard therapy for general population with ischemic heart disease as well as in patients with heart failure (50) as it has been shown to reduce heart failure symptom score, improve NYHA class, increase LV ejection fraction and most importantly improve survival in the general population with heart failure (51-54). The beneficial effects of beta blockers are partly related to their effect on blocking sympathetic overactivity which is considered deleterious in patients with heart failure. Sympathetic overactivity plays an important role in the genesis of hypertension in chronic kidney disease (CKD) (55) and pathogenesis of cardiac hypertrophy (56). Chronic elevation of plasma norepinephrine levels predict adverse cardiovascular outcomes in long-term dialysis patients (57) as well as in heart failure patients (58). A number of observational studies demonstrated improved survival or cardiovascular benefit with beta blockers in dialysis patients (27,59-61). The cardiovascular benefit of beta blockers was also demonstrated in the Dialysis Outcomes and Practice Patterns Study (DOPPS) which included a representative cohort of HD patients. A significant and independent reduction in the risk of cardiovascular mortality was observed with beta blocker treatment (relative risk = 0.87,  $P = 0.004$ ) (62).

There is so far only one prospective RCT evaluating the cardiovascular effects of beta blocker treatment in long-term dialysis patients. The study was of 12-months duration recruiting 114 HD patients with NYHA Class II-III heart failure and LV ejection fraction < 30% on echocardiography, carvedilol treatment was associated with a significant improvement in LV ejection fraction as well as NYHA class (48). Subsequent 24-month extended follow-up of the same cohort suggested survival benefit with carvedilol treatment compared to placebo (51.7% died in carvedilol group vs 73.2% in placebo group;  $P < 0.01$ ). There were significantly fewer cardiovascular deaths (29.3% vs 67.9%;  $P < 0.0001$ ) and all-cause hospital admissions (34.5% vs 58.9%;  $P < 0.005$ ) among the carvedilol than the placebo group. Secondary endpoint analyses revealed lower fatal MIs, fatal strokes, and hospital admissions for worsening heart failure in carvedilol as compared to placebo group. A reduction in sudden deaths and pump-failure deaths was observed in the carvedilol group versus the placebo group, though this did not reach statistical significance (49). This preliminary data suggested cardioprotective benefits of beta blockers in long-term dialysis patients with systolic heart failure. However, the study was small and underpowered and the study included a highly selected group of HD patients with dilated cardiomyopathy. Given that there are no RCTs in PD patients and this is the only trial conducted in dialysis patients with heart failure, the level of recommendation for using beta blockers in PD patients with heart failure is therefore weak. As in the general population with systolic heart failure, treatment with beta blockers should be initiated at a very low dose and titrated upwards slowly to minimize negative inotropic effects. Patients should also be monitored closely to avoid hypotension [Evidence Review Tables 4 and 5].

**Guideline 3.2.5: We suggest peritoneal dialysis patients already receiving an angiotensin converting enzyme inhibitor or angiotensin receptor blocker be considered for treatment with a mineralocorticoid receptor antagonist. (2B)**

### **Rationale**

Aldosterone is well recognized to have an important contribution to sodium and fluid retention in patients with heart failure and plays a key role in myocardial remodeling and promoting collagen deposition, cardiac and kidney fibrosis. Angiotensin converting enzyme (ACE) inhibition suppresses aldosterone production but both aldosterone and angiotensin II may escape the effects of long-term ACE inhibition, resulting in rebound of aldosterone levels (63,64). Thus, giving low dose aldosterone receptor antagonist provides more complete inhibition of the activated renin-angiotensin-aldosterone system in patients with heart failure. This is supported by a number of

large RCTs conducted in the general population showing clear survival benefits, significant reduction in cardiovascular events and death as well as hospitalization with the addition of an aldosterone receptor antagonist in patients with moderate to severe LV systolic dysfunction and heart failure (65,66). There is one prospective RCT conducted in 112 patients with stage 2 -3 CKD showing a significant improvement in LV mass, augmentation index and aortic pulse wave velocity with spironolactone treatment independent of central and peripheral blood pressure reduction versus placebo (67). A very recent open-label RCT in PD patients showed that spironolactone significantly reduced the rate of change in LV mass index at 6 month and the benefit persisted at 18 and 24 months compared to controls. Furthermore, the rate of change in LV ejection fraction also improved significantly at 24 weeks with spironolactone compared to controls (68). This is so far the first RCT in PD patients evaluating mineralocorticoid receptor antagonist on echocardiographic parameters [Evidence Review Table 2]. Given the very encouraging quality evidence, a weak recommendation statement was drawn on the use of aldosterone receptor antagonists in regressing LVH in PD patients. Given that PD patients appear to have a higher risk for hypo- rather than hyperkalemia, aldosterone receptor antagonists may potentially be safer in the PD compared to HD population. A recent prospective open-label RCT conducted in 309 oligoanuric HD patients already receiving an ACEI or ARB showed that adding spironolactone to ACEI or ARB treatment significantly lowered the risk of reaching primary composite endpoint of death from cardiovascular and cerebrovascular events and hospitalizations due to cardiovascular and cerebrovascular events. Spironolactone treatment was also associated with a reduced risk of secondary endpoint, namely death from all causes (69) [Evidence Review Table 6]. Given the good quality evidence from this RCT that demonstrated significant cardiovascular benefits of spironolactone in HD patients, the workgroup felt that a recommendation statement should be drawn on the use of mineralocorticoid receptor antagonist additional to ACEI or ARB in PD patients. However, since there are so far no similar studies in PD patients and specifically in relation to reducing the risk of heart failure in PD patients. The recommendation was therefore graded as 2B.

**Guideline 3.2.6: We suggest peritoneal dialysis patients with heart failure and anemia receive treatment for anemia and have target hemoglobin no different from peritoneal dialysis patients without heart failure. (2D)**

### **Rationale**

Anemia has been shown in an observational study to be an important predictor of clinical and echocardiographic cardiac disease, namely LV dilatation, development of *de novo* and recurrent heart failure as well as mortality in end stage renal disease (ESRD) patients (70). An earlier uncontrolled study in HD patients reported an improvement in LVH and geometry after 7 months of erythropoietin treatment (71). However, the studies that examined the echocardiographic effects of erythropoietin were mostly of very small sample size and uncontrolled and did not fulfill the inclusion criteria for evidence review [Evidence Review Table 7]. There are so far no RCTs that examined the use of erythropoiesis stimulating agents as a treatment strategy for retarding LVH, improving LV function and reduce heart failure in PD patients. In an RCT by Foley and co-workers, 146 HD patients with either concentric LVH or LV dilatation were randomized to receive erythropoietin to achieve hemoglobin of 10 g/dL or 13.5 g/dL for 48 week, normalization of hemoglobin did not regress established LVH or dilatation (72). Another prospective RCT recruiting 596 incident HD patients with anemia and without symptomatic cardiac disease found no beneficial effect on cardiac structure, namely LV volume index and LV mass index with normalization of hemoglobin to 13.5 -14.5 g/dL with erythropoietin treatment compared to partial

correction of anemia to a hemoglobin of 9.5 – 11.5 g/dL for 96 weeks (73). A previous meta-analysis including 15 eligible studies involving 1731 CKD and ESRD patients showed a reduction in LV mass index with treatment of severe anemia (namely, patients with hemoglobin <10 g/dL) to conventional hemoglobin target ( $\leq 12$  g/dL). However, in moderate anemia (that is, hemoglobin level  $\geq 10$  g/dL), treating anemia to a target hemoglobin  $>12$  g/dL did not show a significant beneficial impact on LV mass index compared to conventional hemoglobin target ( $\leq 12$  g/dL) (74). Taken together, the current evidence does not support correction of anemia as a therapeutic strategy for regressing LVH and dilatation or preventing heart failure in dialysis (PD) patients. Treatment of severe anemia to conventional hemoglobin target of  $\leq 12$  g/dL may improve LV mass but these studies lacked control groups. There is no RCT that examined whether treatment of anemia may improve hard outcomes in PD patients with heart failure. The workgroup felt that treatment of anemia in PD patients should follow that recommended by the Kidney Disease Improving Global Outcomes Guidelines [Evidence Review Table 7].

## **Other Potential Therapies**

### ***Salt restriction***

Circulatory congestion is a highly prevalent complication in PD patients (13). Observational studies have reported an important positive relationship between circulatory congestion and volume overload with LVH and abnormal LV geometry in PD patients (9,75,76). Reversing hypervolemia and underlying positive sodium balance as well as improving blood pressure control remain a key management strategy in PD patients with heart failure and circulatory congestion (77). This is based on non-randomized, interventional studies showing how aggressive sodium and fluid removal, stringent control of salt intake and lowering of dialysate sodium concentration may reduce hypertension, retard LVH and dilatation without the need of anti-hypertensive drugs in both HD and PD patients (78,79). However, the sample size of these studies was very small (<50 subjects) and we lack RCTs to confirm whether aggressive salt and fluid restriction may confer any 'hard outcomes' benefit in dialysis patients with and without heart failure including PD patients. Nevertheless, taking into consideration data from the general population and also experimental data (80) and given that this management strategy has virtually no cost and represents lifestyle modification, we have given a strong level of recommendation on restricting salt intake in all PD patients (Guideline 1.2), in keeping with the Kidney Disease Improving Global Outcomes (KDIGO) 2012 Clinical Practice Guideline for the Evaluation and Management of Chronic Kidney Disease. This recommendation is of course applicable to patients with heart failure, in line with the Practice Guidelines of the American College of Cardiology Foundation/American Heart Association Task Force (ACCF/AHA) on Diagnosis and Management of Heart Failure in Adult General population 2009 (50).

### ***Volume control***

There are 2 RCTs that examined the use of icodextrin as a treatment strategy in improving volume control and only 1 study examined the effects of icodextrin on LV structural abnormalities in PD patients. A study by Davies and co-workers recruited PD patients with urine output less than 750 mLs per day and with high peritoneal membrane transport status, either treated hypertension or untreated hypertension, or a requirement of equivalent of all 2.27% glucose PD solutions. The study did not examine change in LV mass as one of the study outcomes though an improvement in fluid status and fluid removal was observed in the icodextrin treated group after 6 months (81). Another study by Konings *et al* observed a significant reduction in LV mass, increase in daily ultrafiltration volume and reduction in extracellular water 4 months after icodextrin compared to

control group using 1.5% PD solutions (82). However, both studies were of very small sample size and very short duration ( $\leq 6$  months) and did not examine corresponding cardiac functional changes and most importantly hard outcomes. In addition, the majority of patients in the study by Konings still had significant residual renal function and did not have ultrafiltration failure. There were also some concerns that some patients actually developed a decline in residual renal function after icodextrin treatment and secondary analysis showed that these patients were actually underhydrated. Thus, even though the preliminary findings appear favorable, the effects of icodextrin on LV mass and function remained to be confirmed in adequately powered studies. The impact of icodextrin on hard outcomes in PD patient subgroups such as those with diabetes, high transport status or heart failure has also not been studied. Thus, even though the effects of icodextrin in improving fluid removal and blood pressure control in patients with high transport status or low urine volume are promising, it remains premature to make recommendations on the generalized use of icodextrin as a therapeutic strategy for retarding LV structural and functional abnormalities in PD patients with or without heart failure. Please see also fluid management section. [Evidence Review Table 8]

### ***Activated vitamin D***

There is emerging data that activated vitamin D plays a role in cardiovascular disease beyond its effect on calcium and phosphorus homeostasis. 25-hydroxyvitamin D deficiency has been associated with impairment of cardiac contractile function (83,84), increased myocardial collagen content and mass (85,86) in different experimental studies which may further predispose to heart failure. Studies in HD and PD patients reported similar associations between low 25-hydroxyvitamin D status and poor LV function (87,88). In addition, a low serum 25-hydroxyvitamin D level predicts an increased risk of cardiovascular events including heart failure (87). However, 2 recent prospective RCTs comparing activated vitamin D treatment at a dose that effectively suppressed secondary hyperparathyroidism versus placebo failed to show any significant regression in cardiac magnetic resonance imaging measured LV mass index (primary endpoints in both studies) in stages 3 -5 CKD patients (89,90) [Evidence Review Table 9]. There is currently an ongoing RCT examining the effect of 25-hydroxyvitamin D supplementation and volume control on cardiac magnetic resonance imaging-determined LV mass index in PD patients and results not available yet. Thus, no recommendation can be made with the use of activated vitamin D as a cardioprotection strategy in PD patients.

### ***Cardiac resynchronization therapy***

Ventricular mechanical dyssynchrony is frequently observed in the general population with heart failure and results in suboptimal ventricular filling, reduced cardiac output (91) and predicts an increased mortality (92,93). Cardiac resynchronization therapy (CRT) improves ventricular contraction and reduces the degree of secondary mitral regurgitation and when added to optimal medical therapy, has been shown to improve health-related quality of life, functional class, exercise capacity and LV ejection fraction in patients with systolic heart failure (94-96). In two meta-analyses of CRT trials in patients with reduced LV ejection fraction, prolonged QRS interval and NYHA class III or IV symptoms, CRT has been shown to reduce hospitalizations for heart failure by 32% and all-cause mortality by over 20%, with benefits most pronounced in patients with class III and IV symptoms and driven largely by a reduction of death due to progressive heart failure (97,98). These data clearly support the use of CRT in systolic heart failure patients with ventricular dyssynchrony. However, the effects of CRT in dialysis (including PD) patients with systolic heart failure on hard outcomes as well as surrogate outcomes have so far not been investigated and thus recommendation cannot be made in this population.

**Evidence Review Table 1.** Studies that examined prevalence and importance of cardiac structural and functional abnormalities in dialysis patients.

| Reference                       | Population and number of patients                                      | Study design                | Outcomes of interest              | Follow-up duration (if applicable) | Prevalence and outcome results                                                                                                                                                                                                                                                                                                                                                                                                                                                                                                                                                                                                                                                                                                   | Study quality |
|---------------------------------|------------------------------------------------------------------------|-----------------------------|-----------------------------------|------------------------------------|----------------------------------------------------------------------------------------------------------------------------------------------------------------------------------------------------------------------------------------------------------------------------------------------------------------------------------------------------------------------------------------------------------------------------------------------------------------------------------------------------------------------------------------------------------------------------------------------------------------------------------------------------------------------------------------------------------------------------------|---------------|
| Greaves et al<br>AJKD 1994 (1)  | 54 prevalent CAPD, 30 HD                                               | Cross-sectional             | LVH<br><br>Systolic dysfunction   | -                                  | 46% had LVH<br><br>36% had LV systolic dysfunction                                                                                                                                                                                                                                                                                                                                                                                                                                                                                                                                                                                                                                                                               | C             |
| Silaruks et al<br>PDI 2000 (99) | 66 prevalent non-diabetic CAPD patients without dilated cardiomyopathy | Prospective follow-up study | Mortality                         | 24 months                          | 21% mild LVH; 25% severe LVH<br><br>Severe LVH associated with higher mortality<br><br>1 year survival: 72% vs 100% for severe LVH vs normal echo patients (P=0.03)                                                                                                                                                                                                                                                                                                                                                                                                                                                                                                                                                              | C             |
| Zoccali et al<br>JASN 2001 (5)  | 254 prevalent dialysis patients (203 HD & 51 PD)                       | Prospective follow-up study | All-cause mortality, CV mortality | 29 ± 12 months                     | Gender-independent criteria -<br><br>LVH by BSA: 57.1%; LVH by height <sup>2.7</sup> : 70.1%<br><br>Gender-specific criteria –<br><br>LVH by BSA: 70.1%; LVH by height <sup>2.7</sup> 77.2%<br><br>Geometric pattern –<br><br>BSA based: Concentric LVH 30.7%, eccentric LVH 26.4%<br><br>Height based: Concentric LVH 37.4%. eccentric LVH 32.7%<br><br>Concentric LVH by the height <sup>2.7</sup> index was an independent predictor of all-cause mortality (HR, 2.96, 95% CI, 1.40 to 6.26], P =0.004) as well as of CV outcomes (HR, 2.20 [1.12 to 4.30], P =0.02).<br><br>Eccentric LVH by this criterion predicted all-cause death (HR, 2.48, 95% CI, 1.16 to 5.33, P= 0.02) but failed to predict CV outcomes (P = 0.19) | B             |



|                                       |                                              |                                                                                                 |                                            |                   |                                                                                                                                                                                                                                                                                                                                              |   |
|---------------------------------------|----------------------------------------------|-------------------------------------------------------------------------------------------------|--------------------------------------------|-------------------|----------------------------------------------------------------------------------------------------------------------------------------------------------------------------------------------------------------------------------------------------------------------------------------------------------------------------------------------|---|
| Stack et al<br>AJKD 2002 (4)          | 2584 incident<br>new ESRD<br>patients        | Retrospective<br>database review<br>from Dialysis<br>Morbidity and<br>Mortality Study<br>Wave 2 | Mortality                                  | 24 months         | LVH: 16.4%<br><br>The impact of LVH on subsequent mortality was greatest in the first 6 months of follow-up (RR, 1.61; confidence interval [CI], 1.17 to 2.22) and became less pronounced thereafter (RR, 1.36; CI, 1.07 to 1.89; RR, 1.29; CI, 1.07 to 1.56 at the end of 1 and 2 years, respectively).                                     | C |
| Enia et al NDT<br>2001 (2)            | 51 prevalent<br>CAPD, 201 HD                 | Cross-sectional                                                                                 | LVH                                        | -                 | LVH: 86% in PD, 62% in HD                                                                                                                                                                                                                                                                                                                    | C |
| Wang et al<br>Kidney Int<br>2002 (11) | 158 prevalent<br>non-diabetic PD<br>patients | Cross-sectional                                                                                 | LV mass index                              | -                 | LVH: 92.4%                                                                                                                                                                                                                                                                                                                                   | C |
| Toprak et al<br>NDT 2003 (9)          | 69 prevalent<br>CAPD patients                | Cross-sectional                                                                                 | LVH and LV<br>geometric<br>pattern         | -                 | Concentric LVH: 28%, eccentric LVH: 46%, Normal geometry: 14%,<br>concentric remodeling: 12%                                                                                                                                                                                                                                                 | C |
| Zoccali et al<br>JASN 2004<br>(17)    | 254<br>asymptomatic<br>dialysis patients     | Prospective<br>observational<br>study                                                           | Fatal or non-<br>fatal CV<br>events        | 41 ± 22<br>months | Systolic dysfunction: 26% by endocardial fractional shortening; 48% by<br>mwFS<br><br>LV systolic function independently predicts CV events.<br><br>Every 1% ↓ in LVEF, adjusted HR, 1.04 (1.02 – 1.07), P=0.001 in relation<br>to CV events<br><br>Every 1% ↑ in mwFS, adjusted HR, 1.11 (1.03 – 1.19), P=0.002 in relation<br>to CV events | B |
| Zoccali et al KI<br>2004 (15)         | 161 prevalent HD<br>patients                 | Prospective<br>longitudinal<br>study                                                            | CV events                                  | 29 ± 13<br>months | Echo twice 18 ± 2 SD months apart. Every 1 g/m <sup>2.7</sup> /month increase in<br>LVMI was associated with a 62% increase in the incident risk of fatal and<br>nonfatal CV events [adjusted HR, 1.62 (95% CI 1.13-2.33), P= 0.009].                                                                                                        | B |
| Wang et al<br>JASN 2004               | 231 prevalent PD<br>patients                 | Prospective<br>longitudinal                                                                     | Mortality and<br>fatal or non-<br>fatal CV | 30 ± 14<br>months | LVMI, C-reactive protein and loss of residual renal function were each<br>independently associated with mortality and CV events. Compared with<br>patients with none of the three risk factors, those with all three risk                                                                                                                    | B |

|                                         |                                                    |                                          |                                            |                    |                                                                                                                                                                                                                                                                                                                                                                                                                                                                                                                                       |   |
|-----------------------------------------|----------------------------------------------------|------------------------------------------|--------------------------------------------|--------------------|---------------------------------------------------------------------------------------------------------------------------------------------------------------------------------------------------------------------------------------------------------------------------------------------------------------------------------------------------------------------------------------------------------------------------------------------------------------------------------------------------------------------------------------|---|
| (10)                                    |                                                    | study                                    | events                                     |                    | factors had an adjusted HR of 6.94 ( $P = 0.001$ ) and 5.43 ( $P = 0.001$ ) for all-cause mortality and cardiovascular mortality, respectively. In conclusion, inflammation, RRF, and LVH are interrelated and combine adversely to increase mortality and CV death risk of PD patients.                                                                                                                                                                                                                                              |   |
| Zoccali et al<br>JASN 2006<br>(19)      | 191 prevalent dialysis patients                    | Prospective longitudinal study           | CV events                                  | 27 ± 13 months     | Changes in mwFS over 17 ± 2 months maintained an independent association with CV events (adjusted HR, 0.49; 95% CI, 0.27 to 0.88; $P = 0.02$ ) than in those who had a decrease in mwFS.                                                                                                                                                                                                                                                                                                                                              | B |
| Wang et al<br>Kidney Int<br>2006 (13)   | 222 prevalent PD patients                          | Prospective longitudinal follow-up study | Circulatory congestion                     | 3 years            | LV Mass index [adjusted HR, 1.006, 95% CI, 1.000 – 1.011, $P$ -value = 0.05] and ejection fraction [adjusted HR, 0.97, 95% CI, 0.94 – 0.99, $P = 0.014$ ] independently predicts circulatory congestion.                                                                                                                                                                                                                                                                                                                              | B |
| Tian et al<br>Renal Fail<br>2008 (6)    | 48 HD, 62 PD prevalent                             | Cross-sectional                          | LVH                                        | -                  | LVH: 68.8% in HD, 45.2% in PD                                                                                                                                                                                                                                                                                                                                                                                                                                                                                                         | C |
| Wang et al<br>Hypertension<br>2008 (21) | 220 prevalent PD patients                          | Prospective longitudinal study           | Mortality and fatal or non-fatal CV events | Mean FU: 48 months | E/Em ratio elevated > 15 in 62% of patients<br><br>E/Em ratio emerged as an independent predictor of all-cause mortality [adjusted HR, 1.027, 95% CI, 1.003 – 1.051; $P = 0.026$ ] and cardiovascular death [adjusted HR, 1.033, 95% CI, 1.002 – 1.065; $P = 0.035$ ]. In addition, the E/Em ratio added significant incremental prognostic value for all-cause mortality [ $P = 0.035$ ] and cardiovascular death [ $P = 0.035$ ] beyond the standard clinical, biochemical, dialysis parameters and echocardiographic measurements. | B |
| Cheng et al<br>2009 (7)                 | 237 prevalent dialysis patients (49 HD and 188 PD) | Cross-sectional                          | LVH                                        | -                  | LVH: BSA-based definition – HD: 44.8% Male and 80% female<br><br>PD: 47.6% male and 65.1% female<br><br>Height based definition – overall 62.8%                                                                                                                                                                                                                                                                                                                                                                                       | C |
| Yamada et al<br>CJASN 2010<br>(18)      | 1254 incident patients starting HD                 | Prospective longitudinal follow-up study | All-cause death & CV death                 | 4.2 ± 2.4 years    | Reduced LV EF predicts all-cause and CV mortality independent of other risk factors and have additional prognostic value beyond other risk factors<br><br>All-cause mortality: $P < 0.0001$ EF; AHR (95% CI) < 0.3 7.28 (3.06 – 7.34);                                                                                                                                                                                                                                                                                                | B |

|                                              |                                                              |                                          |                      |                |                                                                                                                                                                                                                                                                                                                                                                                                                                                             |   |
|----------------------------------------------|--------------------------------------------------------------|------------------------------------------|----------------------|----------------|-------------------------------------------------------------------------------------------------------------------------------------------------------------------------------------------------------------------------------------------------------------------------------------------------------------------------------------------------------------------------------------------------------------------------------------------------------------|---|
|                                              |                                                              |                                          |                      |                | <p>0.3-0.4 4.00 (2.02 – 7.92); 0.4-0.5 1.26 (1.01 – 1.85); 0.5-0.6 1.02 (0.8 – 1.42) &gt;0.6 reference</p> <p>Adding LV EF increase C-statistics from 0.751 to 0.768 (0.729 -0.809), P=0.001</p> <p>CV mortality (P&lt;0.0001); &lt;0.3 9.42 (3.82 – 23.3); 0.3-0.4 4.99 (1.91 – 13.0); 0.4-0.5 2.58 (1.19 – 5.06); 0.5-0.6 1.20 (0.65 – 2.21) &gt;0.6 reference</p> <p>Adding LVEF increase C-statistics from 0.750 to 0.789 (0.715 – 0.863). P=0.0049</p> |   |
| Wang et al Hypertension 2010 (20)            | 230 prevalent PD patients                                    | Prospective longitudinal follow-up       | Sudden cardiac death | 5 years        | <p>Reduced LV EF independently predicts sudden cardiac death</p> <p>Every 1% reduction in EF was independently associated with 7% reduction in the risk of sudden cardiac death (95% CI, 0.89-0.97, P=0.0012). Its importance outweighed LV mass index.</p>                                                                                                                                                                                                 | B |
| Wang et al CJASN 2011 (12)                   | 220 prevalent PD patients                                    | Prospective longitudinal follow-up study | Heart failure        | 4 years        | <p>LV mass index predicts heart failure independently [adjusted HR, 1.004, 95% CI, 1.001 – 1.007, P= 0.003] in multivariable Cox regression model including also previous history of heart failure. LV EF predicts heart failure independently [adjusted HR, 0.97, 95% CI, 0.95 – 1.00, P=0.02] in the multivariable Cox regression model not including previous history of heart failure.</p>                                                              | B |
| Yilmaz et al Kidney Blood Press Res 2012 (8) | 87 prevalent PD patients                                     | Cross-sectional                          | LVH                  | -              | <p>LVH: 44%, Normal LV geometry: 50.6%</p>                                                                                                                                                                                                                                                                                                                                                                                                                  | C |
| Rocha et al J Nephrol 2012 (14)              | 79 prevalent dialysis patients (63 patients on waiting list) | Prospective follow-up                    | Adverse CV events    | 31 ± 19 months | <p>Time on transplant waiting list associated with progressive increase in left atrial diameter and LV mass.</p> <p>LA diameter (HR, 8.84, 95% CI, 1.95 – 40.53, P=0.005), systolic dysfunction (Fractional shortening) (HR, 0.74, 95% CI, 0.59 – 0.92; P=0.007) and LV Mass index (HR, 1.023, 95% CI, 1.005 – 1.041, P=0.013)</p>                                                                                                                          | C |

|                                                  |                                                            |                       |                                            |               |                                                                                                                                                                                                                      |   |
|--------------------------------------------------|------------------------------------------------------------|-----------------------|--------------------------------------------|---------------|----------------------------------------------------------------------------------------------------------------------------------------------------------------------------------------------------------------------|---|
|                                                  |                                                            |                       |                                            |               | predicts adverse CV events                                                                                                                                                                                           |   |
| Iwabuchi et al. Intern Med 2012 (22)             | 161 prevalent HD patients with preserved systolic function | Prospective follow-up | CV events                                  | 4 years       | Tissue Doppler derived measure E/Em ratio predicted CV events in HD patients better than other parameters (P=0.0016)<br><br>E/Em ratio in relation to CV events, adjusted HR, 1.07 (95% CI, 1.019 – 1.118; P=0.0078) | C |
| Dogan et al. Eur Rev Med Pharmacol Sci 2012 (23) | 45 prevalent HD patients                                   | Prospective follow-up | Combined all-cause mortality and CV events | 52 ± 26months | Tissue Doppler derived measure E/Em ratio predicted combined mortality and CV events (adjusted HR, 1.20, 95% CI, 1.03 – 1.39; P=0.018)                                                                               | C |

CAPD = continuous ambulatory peritoneal dialysis; HD = hemodialysis; LVH = left ventricular hypertrophy; LV = left ventricular; CV = cardiovascular; HR = hazard ratio, RR = relative risk; CI = confidence intervals; SD = standard deviation; mwFS = midwall fractional shortening; EF = ejection fraction; E/Em = ratio of early diastolic transmitral flow velocity to early diastolic mitral annular velocity; LA = left atrial; pts. = patients.

**Evidence Review Table 2.** Studies that examined the effects of renin-angiotensin aldosterone system blockers on left ventricular structural and functional abnormalities in dialysis patients.

| Reference                    | Patient type, number                                                  | Treatment arm                        | Study design    | Follow-up duration | Primary endpoints                                        | Results                                                                                                                                                                                                                          | Study quality |
|------------------------------|-----------------------------------------------------------------------|--------------------------------------|-----------------|--------------------|----------------------------------------------------------|----------------------------------------------------------------------------------------------------------------------------------------------------------------------------------------------------------------------------------|---------------|
| Cice et al JACC 2010 (36)    | 332 HD patients with HF, NYHA class II to III, EF ≤ 40%               | Telmisartan + ACEI vs Placebo + ACEI | Prospective RCT | 3 years            | All-cause mortality; CV mortality; and HF hospital stay. | Secondary endpoints:<br><br>Sig. reduction in LV end-diastolic diameter [-0.12 ± 0.6 vs -0.04 ± 0.3 cm/m <sup>2</sup> ; P<0.0001] and improved LV EF [5.8 ± 6.7% vs 3.1 ± 4.4%; P<0.0001] in carvedilol treated group vs placebo | B             |
| Edwards et al JACC 2009 (67) | 112 patients with stage 2 & 3 CKD with good BP and already on ACEI or | Spirolactone vs placebo              | Prospective RCT | 40 weeks           | Change in MRI determined LV mass                         | Spirolactone sig. reduced MRI determined LV mass and improves arterial stiffness. Prevalence of LVH decreased by 50% with spironolactone but unchanged with placebo                                                              | B             |

|                                       |                                                                                                                                                                                                                                      |                              |                         |          |                                  |                                                                                                                                                                                                                                                                                                                                                                                                                                                                                                                                                                                                                                                                                                                                                                                                                                                                                                                                                                                                                                                                            |   |
|---------------------------------------|--------------------------------------------------------------------------------------------------------------------------------------------------------------------------------------------------------------------------------------|------------------------------|-------------------------|----------|----------------------------------|----------------------------------------------------------------------------------------------------------------------------------------------------------------------------------------------------------------------------------------------------------------------------------------------------------------------------------------------------------------------------------------------------------------------------------------------------------------------------------------------------------------------------------------------------------------------------------------------------------------------------------------------------------------------------------------------------------------------------------------------------------------------------------------------------------------------------------------------------------------------------------------------------------------------------------------------------------------------------------------------------------------------------------------------------------------------------|---|
|                                       | ARBs                                                                                                                                                                                                                                 |                              |                         |          |                                  |                                                                                                                                                                                                                                                                                                                                                                                                                                                                                                                                                                                                                                                                                                                                                                                                                                                                                                                                                                                                                                                                            |   |
| Edwards et al Am J Cardiol 2010 (100) | 112 patients with stage 2 & 3 CKD with good BP and already on ACEI or ARBs                                                                                                                                                           | Spironolactone vs placebo    | Prospective RCT         | 40 weeks | Change in MRI determined LV mass | <p>Secondary endpoints:</p> <p>Spironolactone improved LV long-axis systolic function (<math>S_m</math> <math>8.2 \pm 1.4</math> vs <math>7.7 \pm 1.3</math> cm/s, <math>p &lt; 0.05</math>), torsion (<math>7.77 \pm 1.61^\circ</math> vs <math>6.77 \pm 1.48^\circ</math>, <math>p &lt; 0.05</math>), and myocardial deformation (strain rate <math>-1.14 \pm 0.24</math> vs <math>-1.09 \pm 0.20</math> s<sup>-1</sup>, <math>p &lt; 0.05</math>) compared to placebo, without a change in the ejection fraction. Markers of LV relaxation (<math>E/e'</math> ratio <math>7.2 \pm 2.3</math> vs <math>8.5 \pm 2.3</math>, <math>p &lt; 0.05</math>) and suction (M-mode propagation velocity <math>56 \pm 12</math> vs <math>50 \pm 12</math> cm/s, <math>p &lt; 0.05</math>) were also improved. Spironolactone reduced NTproBNP (<math>24.8</math> pmol/L [range 0.4 to 122.4] vs <math>39.4</math> pmol/L [range 10.8 to 102.4], <math>p &lt; 0.01</math>) and attenuated an increase in aminoterminal propeptide of type III procollagen observed with placebo.</p> | B |
| Yang et al Am J Med Sci 2013 (37)     | <p>Meta-analysis of 6 RCTs including total 207 participants (sample size of individual trials &lt; 50 subjects)</p> <p>Total: 107 ARB vs 100 non-ARB</p> <p>HD: 63 vs 60 (ARB vs. non-ARB)</p> <p>PD: 44 vs 40 (ARB vs. non-ARB)</p> | ARB vs non-ARB               | Meta-analysis of 6 RCTs | -        | LVMi                             | <p>ARB group had greater regression of LVMi than non-ARB group (<math>P = 0.002</math>) in dialysis patients but no significant difference in LV EF (<math>P = 0.30</math>). The ARB group had a non-significantly greater therapeutic value on LVMi and LVEF when compared with ACEI; <math>P = 0.74</math> and <math>0.49</math>, respectively).</p> <p>No significant alterations were observed in LVMi and LVEF between the combination of ARBs and ACEIs and ARBs group (<math>P = 0.43</math> and <math>0.24</math>, respectively).</p> <p>Greater LV mass regression was observed with ARB vs. non-ARB in HD pts (<math>P = 0.009</math>)</p> <p>Greater LV mass regression was observed with ARB vs. non-ARB in PD pts (<math>P = 0.03</math>)</p>                                                                                                                                                                                                                                                                                                                 | C |
| Robson et al Nephrol 1997 (38)        | 107 CAPD or HD patients                                                                                                                                                                                                              | Enalapril + Zocor vs placebo | Placebo-controlled RCT  | 6 months | LV mass                          | No statistically significant difference in LV mass or dimensions between patients assigned enalapril vs. placebo                                                                                                                                                                                                                                                                                                                                                                                                                                                                                                                                                                                                                                                                                                                                                                                                                                                                                                                                                           | C |

|                                    |                                               |                           |                            |         |                         |                                                                                                                                                                                                                                                                                                                                                                                                                               |   |
|------------------------------------|-----------------------------------------------|---------------------------|----------------------------|---------|-------------------------|-------------------------------------------------------------------------------------------------------------------------------------------------------------------------------------------------------------------------------------------------------------------------------------------------------------------------------------------------------------------------------------------------------------------------------|---|
| Ito et al Am Soc Nephrol 2014 (68) | 158 PD patients already receiving ACEI or ARB | Spirinolactone vs control | Open-label prospective RCT | 2 years | Change in LV Mass index | Rate of change in LV mass index assessed by echo (study primary endpoint) improved significantly at 6 (P=0.03), 18 (P=0.004) and 24 (P=0.01) month in spironolactone group compared to control.<br><br>Rate of change in LV ejection fraction improved significantly at 24 wks with spironolactone compared to control (P=0.02).<br><br>Benefit of spironolactone was clear in patients with reduced residual renal function. | B |
|------------------------------------|-----------------------------------------------|---------------------------|----------------------------|---------|-------------------------|-------------------------------------------------------------------------------------------------------------------------------------------------------------------------------------------------------------------------------------------------------------------------------------------------------------------------------------------------------------------------------------------------------------------------------|---|

HD = hemodialysis; HF = heart failure; ACEI = angiotensin converting enzyme inhibitor; LV = left ventricular; CKD = chronic kidney disease; RCT = randomized controlled trial; MRI = magnetic resonance imaging; LVH = left ventricular hypertrophy; BP = blood pressure; Sm = systolic mitral annular velocity; E/Em = ratio of early diastolic transmitral flow velocity to early diastolic mitral annular velocity; ARB = angiotensin receptor blocker; NT-pro-BNP = N-terminal pro-brain natriuretic peptide; LVMI,= left ventricular mass index; EF = ejection fraction; CAPD = continuous ambulatory peritoneal dialysis; PD = peritoneal dialysis.

**Evidence Review Table 3.** Studies that examined angiotensin converting enzyme inhibitor or angiotensin receptor blocker in relation to clinical outcomes of dialysis patients

| Reference                         | Population and number of patients                    | ACEI/ARB            | Study design                       | Primary endpoints                                                                                                                                                                             | Follow-up duration | Results                                                                                                                                              | Study quality |
|-----------------------------------|------------------------------------------------------|---------------------|------------------------------------|-----------------------------------------------------------------------------------------------------------------------------------------------------------------------------------------------|--------------------|------------------------------------------------------------------------------------------------------------------------------------------------------|---------------|
| Zannad et al Kidney Int 2006 (46) | 397 HD patients with LVH                             | ACEI vs placebo     | Prospective placebo-controlled RCT | CV event (defined as a composite of CV death, nonfatal myocardial infarction, unstable angina, stroke, revascularization, hospitalization for heart failure, and resuscitated cardiac arrest) | 24 months          | AHR, 0.93 (95% CI, 0.68–1.26), P= 0.35 in the intention to treat analysis<br><br>AHR, 0.80 (95% CI, 0.59–1.1), P= 0.099 in the per protocol analysis | B             |
| Takahashi et al NDT, 2006 (47)    | 80 HD pts with no clinical evidence of heart disease | ARB vs no treatment | Open-label RCT                     | Cardiovascular events (including fatal/nonfatal myocardial infarction, unstable angina pectoris, congestive heart failure, severe arrhythmia)                                                 | 19.4 ± 1.2 months  | AHR, 0.23 (95% CI, 0.08–0.67), P<0.01                                                                                                                | C             |

|                                   |                                                                 |                                      |                                                         |                                                                                                                                                                                                     |                                                 |                                                                                                                                                                                                                                                                                                                                                                                                                                                                          |   |
|-----------------------------------|-----------------------------------------------------------------|--------------------------------------|---------------------------------------------------------|-----------------------------------------------------------------------------------------------------------------------------------------------------------------------------------------------------|-------------------------------------------------|--------------------------------------------------------------------------------------------------------------------------------------------------------------------------------------------------------------------------------------------------------------------------------------------------------------------------------------------------------------------------------------------------------------------------------------------------------------------------|---|
|                                   |                                                                 |                                      |                                                         | and sudden death)                                                                                                                                                                                   |                                                 |                                                                                                                                                                                                                                                                                                                                                                                                                                                                          |   |
| Cice et al<br>JACC 2010<br>(36)   | 332 HD patients with NYHA class II – III heart failure, EF ≤40% | Telmisartan + ACEI vs placebo + ACEI | Prospective placebo-controlled RCT                      | Primary endpoints: All-cause mortality, hospital admissions for heart failure, all CV death<br><br>Secondary endpoints: Nonfatal MI and nonfatal stroke, pump failure deaths, sudden cardiac deaths | 3 years                                         | All-cause mortality: AHR, 0.51 (0.32–0.82), P=0.004<br><br>Hospital admissions for heart failure: AHR, 0.38 (0.19–0.51), P=0.00007<br><br>All cardiovascular death: AHR, 0.42 (0.38–0.61), P=0.00009<br><br>Nonfatal MI and nonfatal stroke: NS<br><br>Exploratory analysis – Pump failure deaths: AHR, 0.45 (0.25 – 0.66), P=0.0004<br><br>Sudden cardiac deaths: AHR, 0.53 (0.33 – 0.68), P=0.008<br><br>Permanent treatment withdrawal: AHR, 1.3 (1.1 – 1.6), P=0.008 | B |
| Akbari et al<br>PDI 2009<br>(101) | PD patients (total n = 154<br><br>Combining all 4 trials)       | ACEI vs placebo or ARB vs placebo    | Systematic review of 4 RCTs (all small sample size <50) | Mortality and CV events not primary endpoints in all these 4 trials                                                                                                                                 | 12 months in 3 studies and 24 months in 1 study | Mortality : OR, 1.56 (95% CI, 0.24 – 10.05) for ACEI vs. placebo<br><br>CV events: OR, 1.00 (95% CI, 0.19 – 5.40) for ACEI vs placebo<br><br>Insufficient evidence to recommend use of ACEI or ARB in lowering hard outcomes in PD patients.                                                                                                                                                                                                                             | C |

HD = hemodialysis; PD = peritoneal dialysis; CVD = cardiovascular disease; ACEI = angiotensin converting enzyme inhibitor; CCB = calcium channel blocker; ARB = angiotensin receptor blocker; CV = cardiovascular, AHR = adjusted hazard ratio; CI = confidence intervals; RCT = randomized controlled trial; NYHA = New York Heart Association; MI = myocardial infarction; OR = odds ratio.

**Evidence Review Table 4.** Studies that examined the effect of beta blocker on left ventricular structural and functional abnormalities in dialysis patients.

| Reference                 | Patient type, number                        | Beta blocker          | Study design                                                 | Follow-up duration | Primary endpoints                                                                                                | Results                                                                                                                                                                                                                                                                                                                                                                                                                                                                                                                                                                                                                                                  | Study quality |
|---------------------------|---------------------------------------------|-----------------------|--------------------------------------------------------------|--------------------|------------------------------------------------------------------------------------------------------------------|----------------------------------------------------------------------------------------------------------------------------------------------------------------------------------------------------------------------------------------------------------------------------------------------------------------------------------------------------------------------------------------------------------------------------------------------------------------------------------------------------------------------------------------------------------------------------------------------------------------------------------------------------------|---------------|
| Cice et al JACC 2001 (48) | 114 HD patients with dilated cardiomyopathy | Carvedilol vs placebo | Prospective placebo controlled RCT                           | 12 months          | Changes in LVEDV, LVESV and LVEF at 1, 6 and 12 months, and changes in symptoms of heart failure 6 and 12 months | Significant increase in LV EF (from 26.3% to 34.8%, $P < 0.05$ vs basal and placebo group) and reduction of both LV EDV (from 100 mL/m <sup>2</sup> to 94 mL/m <sup>2</sup> , $P < 0.05$ vs basal and placebo group) and LV ESV (from 74 mL/m <sup>2</sup> to 62 mL/m <sup>2</sup> , $P < 0.05$ vs basal and placebo group) reached statistical significance after six months, compared with baseline and corresponding placebo values, and remained significant at one year ( $p < 0.05$ vs basal and placebo group).                                                                                                                                   | B             |
| Cice et al JACC 2003 (49) | 114 HD patients with dilated cardiomyopathy | Carvedilol vs placebo | Prospective placebo controlled RCT (but unblinded at 1 year) | 24 months          | Changes in LVEDV, LVESV and LVEF at 1, 6 and 12 months, and changes in symptoms of heart failure 6 and 12 months | Significant reduction in LV volumes and improvement in LV ejection fraction with carvedilol but not placebo<br><br>LVEDV: 100 ± 9 mL/m <sup>2</sup> at baseline to 94 ± 5 mL/m <sup>2</sup> at 24 months (carvedilol group) vs. 97 ± 8 mL/m <sup>2</sup> at baseline to 100 ± 5 mL/m <sup>2</sup> at 24 months (placebo group) ( $P < 0.05$ vs. baseline and vs. placebo group)<br><br>LV EF: 26 ± 8% vs. 37 ± 10% (baseline vs. 24 months) (carvedilol group) vs. 26 ± 8% vs. 24 ± 10% (baseline vs 24 months) (placebo group) ( $P < 0.05$ vs. baseline and vs placebo group)<br><br>Cardiovascular mortality:<br><br>AHR, 0.18 (95% CI, 0.06 to 0.55) | B             |

HD = hemodialysis; RCT = randomized controlled trial; LV = left ventricular; EDV = end-diastolic volume; ESV = end-systolic volume; EF = ejection fraction; NYHA = New York Heart Association; AHR = adjusted hazard ratio; CI = confidence intervals.



**Evidence Review Table 5.** Studies that examined beta blockers in relation to hard outcomes in chronic kidney disease and dialysis patients.

| Reference                                      | Patient type, number                                                                                              | Beta blocker          | Study design                                                                                                                           | Study endpoints                                                                                                                                                                                                                  | Follow-up duration                                          | Results                                                                                                                                                                                                                                                                                                                                                                              | Study quality |
|------------------------------------------------|-------------------------------------------------------------------------------------------------------------------|-----------------------|----------------------------------------------------------------------------------------------------------------------------------------|----------------------------------------------------------------------------------------------------------------------------------------------------------------------------------------------------------------------------------|-------------------------------------------------------------|--------------------------------------------------------------------------------------------------------------------------------------------------------------------------------------------------------------------------------------------------------------------------------------------------------------------------------------------------------------------------------------|---------------|
| Cice et al<br>JACC 2003<br>(49)                | 114 HD patients with dilated cardiomyopathy                                                                       | Carvedilol vs placebo | Prospective placebo controlled RCT                                                                                                     | Primary:<br>LV EDV, LVESV, EF and clinical status<br><br>Secondary:<br>All-cause mortality, all CV mortality,<br>All-cause hospitalizations, non-fatal MIs, combined endpoint,<br>Hospital admission for worsening heart failure | 24 months                                                   | All-cause mortality: AHR, 0.51 (95% CI, 0.32 to 0.82)<br><br>All CV mortality: AHR, 0.32 (95% CI, 0.18 to 0.57)<br><br>All-cause hospitalizations: AHR, 0.44 (95% CI, 0.25 to 0.77)<br><br>Non-fatal MIs: AHR, 0.81 (95% CI, 0.61 to 1.34)<br><br>Combined endpoint: 0.76 (95% CI, 0.47-1.22)<br><br>Hospital admission for worsening heart failure: AHR, 0.19 (95% CI, 0.09 – 0.41) | B             |
| Wali et al<br>Circ Heart Failure<br>2011 (102) | 4217 patients with systolic LV dysfunction with/without symptoms of HF, NYHA class I – III (2566, 60.8% with CKD) | Carvedilol            | Meta-analysis of 2 RCTs<br><br>CAPRICORN –<br><br>1959 patients within 21 days after AMI with LVEF ≤0.4 with or without symptomatic HF | Primary:<br>All-cause mortality<br><br>Secondary:<br>CV mortality, HF mortality, first hospitalization for heart failure, composite of CV mortality or HF hospitalization, sudden cardiac death                                  | Median, 13.5 months and<br><br>Mean ± SD, 13.6 ± 7.9 months | Post-hoc analysis:<br>All-cause mortality: AHR, 0.76 (95% CI, 0.63-0.93)<br><br>CV mortality: AHR, 0.76 (95% CI, 0.62 – 0.94)<br><br>HF mortality: AHR, 0.68 (95% CI, 0.52 - 0.88)<br><br>First hospitalization for HF: AHR, 0.74                                                                                                                                                    | B             |

|  |  |  |                                                                                                       |  |  |                                                                                                                                                                            |  |
|--|--|--|-------------------------------------------------------------------------------------------------------|--|--|----------------------------------------------------------------------------------------------------------------------------------------------------------------------------|--|
|  |  |  | COPERNICUS –<br>2289 patients with LVEF ≤0.25 and severe chronic HF of ischemic/non-ischemic etiology |  |  | (95% CI, 0.61 – 0.88)<br><br>Composite of CV mortality or HF hospitalization: AHR, 0.75 (95% CI, 0.65 – 0.87)<br><br>Sudden cardiac death: AHR, 0.76 (95% CI, 0.56 – 1.05) |  |
|--|--|--|-------------------------------------------------------------------------------------------------------|--|--|----------------------------------------------------------------------------------------------------------------------------------------------------------------------------|--|

CKD = chronic kidney disease; PD = peritoneal dialysis; HD = hemodialysis; LV = left ventricular; EDV = end-diastolic volume; ESV = end-systolic volume; EF = ejection fraction; CV = cardiovascular; AHR = adjusted hazard ratio; CI = confidence intervals; RCT = randomized controlled trial; AMI = acute myocardial infarction; HF = heart failure; NYHA = New York Heart Association

**Evidence Review Table 6.** Studies that examined aldosterone receptor antagonist treatment in relation to hard outcomes in dialysis patients.

| Reference                      | Patient type, number        | Aldosterone R antagonists           | Study design               | Study endpoints                                                                                                                         | Follow-up duration | Results                                                                                                                                                                                                                                                                                                                                                                                                                                                                                  | Study quality |
|--------------------------------|-----------------------------|-------------------------------------|----------------------------|-----------------------------------------------------------------------------------------------------------------------------------------|--------------------|------------------------------------------------------------------------------------------------------------------------------------------------------------------------------------------------------------------------------------------------------------------------------------------------------------------------------------------------------------------------------------------------------------------------------------------------------------------------------------------|---------------|
| Matsumoto et al JACC 2014 (69) | 309 oligoanuric HD patients | Spirolactone 25 mg daily vs control | Open label prospective RCT | Primary - composite of death or hospitalization from cardiovascular and cerebrovascular events<br><br>Secondary – death from all causes | 3 years            | Reduced primary endpoint in spironolactone versus control group before (HR, 0.404, 95% CI, 0.202 – 0.809, P=0.017) and after adjustment for confounding covariates (adjusted HR, 0.379, 95% CI, 0.173 – 0.832; P=0.016).<br><br>Reduced secondary endpoint (death from all causes) in spironolactone versus control group (6.4% vs 19.7%, HR, 0.355, 95% CI, 0.191 – 0.662; P=0.002) and (adjusted HR, 0.335, 95% CI, 0.162 – 0.693; P=0.003) before and after adjustment, respectively. | B             |

HD = hemodialysis; RCT = randomized controlled trial; HR = hazard ratio; CI = confidence intervals.

**Evidence Review Table 7.** Studies that examined the effects of erythropoietin stimulating agent on left ventricular structural and functional abnormalities in dialysis patients.

| Reference                                       | Patient type, number.                                                                                                                        | Treatment arm                                                                                                           | Study design                                                  | Primary endpoints | Follow-up duration                             | Results                                                                                                                                                                                                                                                      | Study quality |
|-------------------------------------------------|----------------------------------------------------------------------------------------------------------------------------------------------|-------------------------------------------------------------------------------------------------------------------------|---------------------------------------------------------------|-------------------|------------------------------------------------|--------------------------------------------------------------------------------------------------------------------------------------------------------------------------------------------------------------------------------------------------------------|---------------|
| Parfrey et al CJASN 2009 (74)                   | 15 eligible studies involving 1731 CKD & ESRD patients<br><br>(5 assigned cohorts using RCT design, 6 compared lower HB vs higher HB target) | -                                                                                                                       | Meta-analysis                                                 | LVMi              | 4 months to 4.4 years<br><br>(mean, 16 months) | In severe anemia (Hb <10 g/dL), conventional Hb targets for EPO therapy are associated with a reduction in LVMi, but that in moderate anemia (Hb ≥10 g/dL), target Hb >12 g/dL does not have a beneficial impact on LVMi compared with conventional targets. | C             |
| Maccougall et al NDT 2007 (103)                 | 197 pre-dialysis CKD                                                                                                                         | Eprex at early stage of anemia to maintain Hb at 11 ± 1 g/dL (N=65) vs to fall to ≤9 g/dL before starting Eprex (n=132) | Prospective open-label randomized trial                       | LV mass           | 3 years                                        | LV mass did not differ between early vs late intervention of anemia, time to death/dialysis also not differ between early vs late intervention of anemia                                                                                                     | C             |
| Ritz et al AJKD 2007 (104)<br><br>(ACORD study) | 172 patients with CKD stage 1-3, T1 or 2 diabetes mellitus, mild to moderate anemia                                                          | Hb correction to either target of 13-15 g/dL vs 10.5-11.5 g/dL                                                          | Multi-center randomized open-label parallel study, 64 centers | LVMi              | 15months                                       | Correction to a Hb target level of 13-15 g/dL does not decrease LVMi vs those with Hb level of 10.5-11.5 g/dL                                                                                                                                                | B             |
| Ayus et al KI 2005 (105)                        | 40 anemic CKD pts vs 61 non-anemic CKD patients<br><br>Non-DM, CrCl 10-30 mL/min.                                                            | rhEPO given to those with anemia                                                                                        | Open-label trial                                              | LVMi              | 6 months                                       | LVMi decreased in anemic pts receiving rhEPO with an increase in Hb vs no change in LVMi among controls (P=0.001)                                                                                                                                            | C             |

|                                    |                                                                                   |                                                                                                                                  |                                           |                                                                                                     |           |                                                                                                                                                                                                                                                                                                                         |   |
|------------------------------------|-----------------------------------------------------------------------------------|----------------------------------------------------------------------------------------------------------------------------------|-------------------------------------------|-----------------------------------------------------------------------------------------------------|-----------|-------------------------------------------------------------------------------------------------------------------------------------------------------------------------------------------------------------------------------------------------------------------------------------------------------------------------|---|
|                                    | DM, CrCl 20-40 mL/min.                                                            |                                                                                                                                  |                                           |                                                                                                     |           |                                                                                                                                                                                                                                                                                                                         |   |
| Levin et al<br>AJKD 2005<br>(106)  | 172 CKD pts, mean age 57 years, 38% DM, 70% men (eGFR: 28 vs 30 mL/min)           | SC Eprex to achieve Hb 12-14 g/dL vs delayed treatment group (Hb of 9 ± 0.5 g/dL before Eprex, then target level 9 to 10.5 g/dL) | Prospective randomized trial              | Change in LVMi                                                                                      | 24 months | No statistically significant difference between the two groups for the change in LVMi over 24 months                                                                                                                                                                                                                    | B |
| Parfrey et al<br>JASN 2004<br>(73) | 596 incident HD patients without symptomatic heart disease                        | Randomized to receive Eprex to higher (13.5-14.5 g/dL) vs lower (9.5 to 11.5 g/dL)                                               | Prospective randomized double blind trial | LV volume index                                                                                     | 96 weeks  | LV volume index as well as LVMi did not differ between higher target vs lower target group. Normalization of Hb does not have beneficial effect on cardiac structure compared with partial correction.                                                                                                                  | A |
| Roger et al<br>JASN 2004<br>(107)  | 155 CKD patients (CrCl 15-50 ml/min), Hb 11-12 g/dL (female) or 11-13 g/dL (male) | Randomized to receive SC Eprex to maintain Hb between 12-13 g/dL or 9-10 g/dL                                                    | Prospective randomized trial              | LVMi                                                                                                | 24 months | Similar effects on LVMi between the two groups. Either maintenance level of Hb did not affect the development or progression of LV hypertrophy                                                                                                                                                                          | B |
| Foley et al<br>KI 2000 (72)        | 146 HD patients with either concentric LVH or LV dilatation                       | Randomized to receive Eprex to achieve Hb of 10 or 13.5 g/dL                                                                     | Prospective randomized trial              | Change in LVMi in those with concentric LVH and change in LV volume index in those with LV dilation | 48 weeks  | In pts with concentric LVH, change in LVMi similar between normal and low target Hb groups.<br><br>In patients with LV dilatation, changes in cavity volume index similar between normal and low target Hb groups .<br><br>Normalization of Hb does not regress established concentric LV hypertrophy or LV dilatation. | B |

CKD = chronic kidney disease; HD = hemodialysis; LVMi = left ventricular mass index; EPO = erythropoietin; Hb = hemoglobin; LV = left ventricular; SC = subcutaneous; DM = diabetes mellitus; rhEPO = recombinant human erythropoietin; CrCl = creatinine clearance; LVH = left ventricular hypertrophy.

**Evidence Review Table 8.** Studies that examined the effect of icodextrin on left ventricular structural abnormalities in peritoneal dialysis patients.

| Reference                      | Patient type, number.                                                                                                                                                                                 | Treatment arm                             | Study design                                                                 | Primary endpoints              | Follow-up duration | Results                                                                                                                                                                                                                                                                                                                                                                                                                                                                                | Study quality |
|--------------------------------|-------------------------------------------------------------------------------------------------------------------------------------------------------------------------------------------------------|-------------------------------------------|------------------------------------------------------------------------------|--------------------------------|--------------------|----------------------------------------------------------------------------------------------------------------------------------------------------------------------------------------------------------------------------------------------------------------------------------------------------------------------------------------------------------------------------------------------------------------------------------------------------------------------------------------|---------------|
| Davies S et al JASN 2003(81) * | 50 PD patients with urine output <750 mL/day, high solute transport, and either treated hypertension or untreated BP >140/90 mmHg, or a requirement for the equivalent of all 2.27% glucose exchanges | Icodextrin vs 2.27% glucose as long dwell | Multi-center<br>Randomized<br>double-blind<br>placebo<br>controlled<br>trial | Fluid removal and fluid status | 6 months           | Icodextrin improved fluid removal and fluid status as reflected by body weight, total body water and extracellular water by BIA (primary endpoint) compared to control<br><br>LV mass not reported                                                                                                                                                                                                                                                                                     | C             |
| Konings et al KI 2003 (82) *   | 40 PD patients<br>(32 completed study)                                                                                                                                                                | 22 – icodextrin,<br>18 – control          | Open label<br>randomized<br>study                                            | Fluid status                   | 4 months           | Icodextrin resulted in a significant increase in daily ultrafiltration volume (744 +/- 767 mL vs. 1670 +/- 1038 mL; P = 0.012) and a decrease in ECW (17.5 +/- 5.2 L vs. 15.8 +/- 3.8 L; P = 0.035). Change in ECW between controls and patients treated with icodextrin was significant (-1.7 +/- 3.3 L vs. +0.9 +/- 2.2 L; P = 0.013).<br><br>LVM (not primary endpoint) decreased significantly in the icodextrin (241 +/- 53 g vs. 228 +/- 42 g; P = 0.03), but not control group. | C             |

\*Both studies were not specifically done in PD patients with heart failure.

PD = peritoneal dialysis; LV = left ventricular mass; BIA = bioimpedance analysis; ECW = extracellular water

**Evidence Review Table 9.** Studies that examined the effect of activated vitamin D on left ventricular structural abnormalities in chronic kidney disease.

| Reference                     | Patient type, number.      | Treatment arm           | Study design                                | Follow-up duration | Primary endpoints            | Results                                                                                                                                                             | Study quality |
|-------------------------------|----------------------------|-------------------------|---------------------------------------------|--------------------|------------------------------|---------------------------------------------------------------------------------------------------------------------------------------------------------------------|---------------|
| Thadhani et al JAMA 2012 (89) | 221 CKD stage 3-4 patients | Paricalcitol vs placebo | Multi-national Prospective double-blind RCT | 48 weeks           | LV mass index by cardiac MRI | No significant difference between paricalcitol vs placebo arm in primary endpoint and other echocardiographic LV structural and functional parameters over 48 weeks | B             |
| Wang et al JASN 2013 (90)     | 60 CKD 3-5 patients        | Paricalcitol vs placebo | Prospective double-blind RCT                | 52 weeks           | LV mass index by cardiac MRI | No significant difference between paricalcitol vs placebo in primary endpoint and other echocardiographic LV structural and functional parameters over 48 weeks     | B             |

CKD = chronic kidney disease; LV = left ventricular; MRI = magnetic resonance imaging; RCT = randomized controlled trial

## References

1. Greaves SC, Gamble GD, Collins JF, Whalley GA, Sharpe DN. Determinants of left ventricular hypertrophy and systolic dysfunction in chronic renal failure. *Am J Kidney Dis* 1994;24:768-76.
2. Enia G, Mallamaci F, Benedetto FA, *et al.* Long-term CAPD patients are volume expanded and display more severe left ventricular hypertrophy than haemodialysis patients. *Nephrol Dial Transplant* 2001;16:1459-64.
3. Takeda K, Nakamoto M, Baba M, *et al.* Echocardiographic evaluation in long-term continuous ambulatory peritoneal dialysis compared with the hemodialysis patients. *Clin Nephrol* 1998;49:308-12.
4. Stack AG, Saran R. Clinical correlates and mortality impact of left ventricular hypertrophy among new ESRD patients in the United States. *Am J Kidney Dis* 2002;40:1202-10.
5. Zoccali C, Benedetto FA, Mallamaci F *et al.* Prognostic impact of the indexation of left ventricular mass in patients undergoing dialysis *Am J Nephrol* 2001; 12:2768-74.
6. Tian JP, Wang T, Wang H, *et al.* The prevalence of left ventricular hypertrophy in Chinese hemodialysis patients is higher than that in peritoneal dialysis patients. *Ren Fail* 2008;30:391-400.
7. Cheng LT, Gao YL, Tian JP, *et al.* Sex difference in the prevalence of left ventricular hypertrophy in dialysis patients. *Am J Nephrol* 2009;29:398-405.
8. Yilmaz M, Unsal A, Oztekin E, Kesmezacar O, Kaptanogullari OH, Eren N. The prevalence of hypertension, valve calcification and left ventricular hypertrophy and geometry in peritoneal dialysis patients. *Kidney Blood Press Res* 2012;35:431-7.
9. Toprak A, Koc M, Tezcan H, Ozener IC, Akoglu E, Oktay A. Inferior vena cava diameter determines left ventricular geometry in continuous ambulatory peritoneal dialysis patients: an echocardiographic study. *Nephrol Dial Transplant* 2003; 18:2128-33.
10. Wang AY, Wang M, Woo J *et al.* Inflammation, residual kidney function, and cardiac hypertrophy are interrelated and combine adversely to enhance mortality and cardiovascular death risk of peritoneal dialysis patients. *J Am Soc Nephrol* 2004;15:2186-94.
11. Wang AY, Wang M, Woo J, *et al.* A novel association between residual renal function and left ventricular hypertrophy in peritoneal dialysis patients. *Kidney Int* 2002;62:639-47.
12. Wang AY, Wang M, Lam CW, Chan IH, Lui SF, Sanderson JE. Heart failure in long-term peritoneal dialysis patients: a 4-year prospective analysis. *Clin J Am Soc Nephrol* 2011;6:805-12.
13. Wang AY, Lam CW, Yu CM, *et al.* Troponin T, left ventricular mass, and function are excellent predictors of cardiovascular congestion in peritoneal dialysis. *Kidney Int* 2006;70:444-52.
14. Rocha SG, Chitalia N, Gregson H, Kaski JC, Sharma R, Banerjee D. Echocardiographic abnormalities in patients on kidney transplant waiting list. *J Nephrol* 2012; 25:1119-25.
15. Zoccali C, Benedetto FA, Mallamaci F, *et al.* Left ventricular mass monitoring in the follow-up of dialysis patients: prognostic value of left ventricular hypertrophy progression. *Kidney Int* 2004;65:1492-8.
16. Foley RN, Parfrey PS, Kent GM, Harnett JD, Murray DC, Barre PE. Serial change in echocardiographic parameters and cardiac failure in end-stage renal disease. *J Am Soc Nephrol* 2000;11:912-6.
17. Zoccali C, Benedetto FA, Mallamaci F, *et al.* Prognostic value of echocardiographic indicators of left ventricular systolic function in asymptomatic dialysis patients. *J Am Soc Nephrol* 2004;15:1029-37.
18. Yamada S, Ishii H, Takahashi H, *et al.* Prognostic value of reduced left ventricular ejection fraction at start of hemodialysis therapy on cardiovascular and all-cause mortality in end-stage renal disease patients. *Clin J Am Soc Nephrol* 2010;5:1793-8.

19. Zoccali C, Benedetto FA, Tripepi G, *et al.* Left ventricular systolic function monitoring in asymptomatic dialysis patients: a prospective cohort study. *J Am Soc Nephrol* 2006;17:1460-5.
20. Wang AY, Lam CW, Chan IH, Wang M, Lui SF, Sanderson JE. Sudden cardiac death in end-stage renal disease patients: a 5-year prospective analysis. *Hypertension* 2010;56:210-6.
21. Wang AY, Wang M, Lam CW, Chan IH, Zhang Y, Sanderson JE. Left ventricular filling pressure by Doppler echocardiography in patients with end-stage renal disease. *Hypertension* 2008; 52:107-14.
22. Iwabuchi Y, Ogawa T, Inoue T, Otsuka K, Nitta K. Elevated E/E' predicts cardiovascular events in hemodialysis patients with preserved systolic function. *Intern Med* 2012;51:155-60.
23. Dogan U, Ozdemir K, Akilli H, Aribas A, Turk S. Evaluation of echocardiographic indices for the prediction of major adverse events during long-term follow-up in chronic hemodialysis patients with normal left ventricular ejection fraction. *Eur Rev Med Pharmacol Sci* 2012;16:316-24.
24. Cheung AK, Sarnak MJ, Yan G, *et al.* Cardiac diseases in maintenance hemodialysis patients: results of the HEMO Study. *Kidney Int* 2004; 65:2380-9.
25. Stack AG, Bloembergen WE. A cross-sectional study of the prevalence and clinical correlates of congestive heart failure among incident US dialysis patients. *Am J Kidney Dis* 2001; 38:992-1000.
26. Harnett JD, Foley RN, Kent GM, Barre PE, Murray D, Parfrey PS. Congestive heart failure in dialysis patients: prevalence, incidence, prognosis and risk factors. *Kidney Int* 1995;47:884-90.
27. Trespalacios FC, Taylor AJ, Agodoa LY, Bakris GL, Abbott KC. Heart failure as a cause for hospitalization in chronic dialysis patients. *Am J Kidney Dis* 2003;41:1267-77.
28. Soucie JM, McClellan WM. Early death in dialysis patients: risk factors and impact on incidence and mortality rates. *J Am Soc Nephrol* 1996;7:2169-75.
29. Parfrey PS, Griffiths SM, Harnett JD, *et al.* Outcome of congestive heart failure, dilated cardiomyopathy, hypertrophic hyperkinetic disease, and ischemic heart disease in dialysis patients. *Am J Nephrol* 1990;10:213-21.
30. Wang AY, Wang M, Lam CW, Chan IH, Lui SF, Sanderson JE. Heart failure with preserved or reduced ejection fraction in patients treated with peritoneal dialysis. *Am J Kidney Dis* 2013; 61:975-83.
31. Amann K, Tyralla K, Gross ML, *et al.* Cardiomyocyte loss in experimental renal failure: prevention by ramipril. *Kidney Int* 2003;63:1708-13.
32. Amann K, Gassmann P, Buzello M, *et al.* Effects of ACE inhibition and bradykinin antagonism on cardiovascular changes in uremic rats. *Kidney Int* 2000;58:153-61.
33. London GM, Pannier B, Guerin AP, Marchais SJ, Safar ME, Cuche JL. Cardiac hypertrophy, aortic compliance, peripheral resistance, and wave reflection in end-stage renal disease. Comparative effects of ACE inhibition and calcium channel blockade. *Circulation* 1994; 90:2786-96.
34. Cannella G, Paoletti E, Delfino R, Peloso G, Rolla D, Molinari S. Prolonged therapy with ACE inhibitors induces a regression of left ventricular hypertrophy of dialyzed uremic patients independently from hypotensive effects. *Am J Kidney Dis* 1997;30:659-64.
35. Guerin AP, Blacher J, Pannier B, Marchais SJ, Safar ME, London GM. Impact of aortic stiffness attenuation on survival of patients in end-stage renal failure. *Circulation* 2001;103:987-92.
36. Cice G, Di Benedetto A, D'Isa S, *et al.* Effects of telmisartan added to Angiotensin-converting enzyme inhibitors on mortality and morbidity in hemodialysis patients with chronic heart failure a double-blind, placebo-controlled trial. *J Am Coll Cardiol* 2010; 56:1701-8.
37. Yang LY, Ge X, Wang YL, *et al.* Angiotensin receptor blockers reduce left ventricular hypertrophy in dialysis patients: a meta-analysis. *Am J Med Sci* 2013; 345:1-9.



38. Robson R, Collins J, Johnson R, *et al.* Effects of simvastatin and enalapril on serum lipoprotein concentrations and left ventricular mass in patients on dialysis. The Perfect Study Collaborative Group. *J Nephrol* 1997;10:33-40.
39. Effect of enalapril on survival in patients with reduced left ventricular ejection fractions and congestive heart failure. The SOLVD Investigators. *N Engl J Med* 1991; 325:293-302.
40. Konstam MA, Kronenberg MW, Rousseau MF, *et al.* Effects of the angiotensin converting enzyme inhibitor enalapril on the long-term progression of left ventricular dilatation in patients with asymptomatic systolic dysfunction. SOLVD (Studies of Left Ventricular Dysfunction) Investigators. *Circulation* 1993;88:2277-83.
41. Flather MD, Yusuf S, Kober L, *et al.* Long-term ACE-inhibitor therapy in patients with heart failure or left-ventricular dysfunction: a systematic overview of data from individual patients. ACE-Inhibitor Myocardial Infarction Collaborative Group. *Lancet* 2000; 355:1575-81.
42. Yusuf S, Garg R, McConachie D. Effect of angiotensin-converting enzyme inhibitors in left ventricular dysfunction: results of the studies of left ventricular dysfunction in the context of other similar trials. *J Cardiovasc Pharmacol* 1993; 22 Suppl 9:S28-35.
43. Young JB, Dunlap ME, Pfeffer MA, *et al.* Mortality and morbidity reduction with Candesartan in patients with chronic heart failure and left ventricular systolic dysfunction: results of the CHARM low-left ventricular ejection fraction trials. *Circulation* 2004;110:2618-26.
44. Yusuf S, Sleight P, Pogue J, Bosch J, Davies R, Dagenais G. Effects of an angiotensin-converting-enzyme inhibitor, ramipril, on cardiovascular events in high-risk patients. The Heart Outcomes Prevention Evaluation Study Investigators. *N Engl J Med* 2000; 342:145-53.
45. Latini R, Tognoni G, Maggioni AP, *et al.* Clinical effects of early angiotensin-converting enzyme inhibitor treatment for acute myocardial infarction are similar in the presence and absence of aspirin: systematic overview of individual data from 96,712 randomized patients. Angiotensin-converting Enzyme Inhibitor Myocardial Infarction Collaborative Group. *J Am Coll Cardiol* 2000; 35:1801-7.
46. Zannad F, Kessler M, Leher P, *et al.* Prevention of cardiovascular events in end-stage renal disease: results of a randomized trial of fosinopril and implications for future studies. *Kidney Int* 2006;70:1318-24.
47. Takahashi A, Takase H, Toriyama T *et al.* Candesartan, an angiotensin II type-1 receptor blocker, reduces cardiovascular events in patients on chronic haemodialysis--a randomized study. *Nephrol Dial Transplant* 2006; 21:2507-12.
48. Cice G, Ferrara L, Di Benedetto A, *et al.* Dilated cardiomyopathy in dialysis patients--beneficial effects of carvedilol: a double-blind, placebo-controlled trial. *J Am Coll Cardiol* 2001;37:407-11.
49. Cice G, Ferrara L, D'Andrea A, *et al.* Carvedilol increases two-year survival in dialysis patients with dilated cardiomyopathy: a prospective, placebo-controlled trial. *J Am Coll Cardiol* 2003; 41:1438-44.
50. Jessup M, Abraham WT, Casey DE, *et al.* 2009 focused update: ACCF/AHA Guidelines for the Diagnosis and Management of Heart Failure in Adults: a report of the American College of Cardiology Foundation/American Heart Association Task Force on Practice Guidelines: developed in collaboration with the International Society for Heart and Lung Transplantation. *Circulation* 2009;119:1977-2016.
51. van Campen LC, Visser FC, Visser CA. Ejection fraction improvement by beta-blocker treatment in patients with heart failure: an analysis of studies published in the literature. *J Cardiovasc Pharmacol* 1998;32 Suppl 1:S31-5.
52. Packer M. Effects of beta-adrenergic blockade on survival of patients with chronic heart failure. *Am J Cardiol* 1997;80:46L-54L.
53. Packer M, Bristow MR, Cohn JN. *et al.* The effect of carvedilol on morbidity and mortality in patients with chronic heart failure. U.S. Carvedilol Heart Failure Study Group. *N Engl J Med* 1996;334:1349-55.

54. Heidenreich PA, Lee TT, Massie BM. Effect of beta-blockade on mortality in patients with heart failure: a meta-analysis of randomized clinical trials. *J Am Coll Cardiol* 1997;30:27-34.
55. Ligtenberg G. Regulation of blood pressure in chronic renal failure: determinants of hypertension and dialysis-related hypotension. *Neth J Med* 1999;55:13-8.
56. Bernardi D, Bernini L, Cini G, Ghione S, Bonechi I. Asymmetric septal hypertrophy and sympathetic overactivity in normotensive hemodialyzed patients. *Am Heart J* 1985; 109:539-45.
57. Zoccali C, Mallamaci F, Parlongo S et al. Plasma norepinephrine predicts survival and incident cardiovascular events in patients with end-stage renal disease. *Circulation* 2002;105:1354-9.
58. Cohn JN, Levine TB, Olivari MT, et al. Plasma norepinephrine as a guide to prognosis in patients with chronic congestive heart failure. *N Engl J Med* 1984; 311:819-23.
59. Foley RN, Herzog CA, Collins AJ. Blood pressure and long-term mortality in United States hemodialysis patients: USRDS Waves 3 and 4 Study. *Kidney Int* 2002; 62:1784-90.
60. Wetmore JB, Shireman TI. The ABCs of cardioprotection in dialysis patients: a systematic review. *Am J Kidney Dis* 2009; 53:457-66.
61. Kestenbaum B, Gillen DL, Sherrard DJ, Seliger S, Ball A, Stehman-Breen C. Calcium channel blocker use and mortality among patients with end-stage renal disease. *Kidney Int* 2002; 61:2157-64.
62. Lopes AA, Bragg-Gresham JL, Ramirez SP, et al. Prescription of antihypertensive agents to haemodialysis patients: time trends and associations with patient characteristics, country and survival in the DOPPS. *Nephrol Dial Transplant* 2009; 24:2809-16.
63. Staessen J, Lijnen P, Fagard R, Verschueren LJ, Amery A. Rise in plasma concentration of aldosterone during long-term angiotensin II suppression. *J Endocrinol* 1981;91 :457-65.
64. Borghi C, Boschi S, Ambrosioni E, Melandri G, Branzi A, Magnani B. Evidence of a partial escape of renin-angiotensin-aldosterone blockade in patients with acute myocardial infarction treated with ACE inhibitors. *J Clin Pharmacol* 1993; 33:40-5.
65. Pitt B, Remme W, Zannad F, et al. Eplerenone, a selective aldosterone blocker, in patients with left ventricular dysfunction after myocardial infarction. *N Engl J Med* 2003; 348:1309-21.
66. Pitt B, Zannad F, Remme WJ, et al. The effect of spironolactone on morbidity and mortality in patients with severe heart failure. Randomized Aldactone Evaluation Study Investigators. *N Engl J Med* 1999;341:709-17.
67. Edwards NC, Steeds RP, Stewart PM, Ferro CJ, Townend JN. Effect of spironolactone on left ventricular mass and aortic stiffness in early-stage chronic kidney disease: a randomized controlled trial. *J Am Coll Cardiol* 2009;54:505-12.
68. Ito Y, Mizuno M, Suzuki Y, et al. Long-Term Effects of Spironolactone in Peritoneal Dialysis Patients. *J Am Soc Nephrol* 2013.
69. Matsumoto Y, Mori Y, Kageyama S, et al. Spironolactone reduces cardiovascular and cerebrovascular morbidity and mortality in hemodialysis patients. *J Am Coll Cardiol* 2014; 63:528-36.
70. Foley RN, Parfrey PS, Harnett JD, Kent GM, Murray DC, Barre PE. The impact of anemia on cardiomyopathy, morbidity, and mortality in end-stage renal disease. *Am J Kidney Dis* 1996; 28:53-61.
71. Frank H, Heusser K, Hoffken B, Huber P, Schmieder RE, Schobel HP. Effect of erythropoietin on cardiovascular prognosis parameters in hemodialysis patients. *Kidney Int* 2004;66:832-40.
72. Foley RN, Parfrey PS, Morgan J, et al. Effect of hemoglobin levels in hemodialysis patients with asymptomatic cardiomyopathy. *Kidney Int* 2000; 58:1325-35.

73. Parfrey PS, Foley RN, Wittreich BH, Sullivan DJ, Zagari MJ, Frei D. Double-blind comparison of full and partial anemia correction in incident hemodialysis patients without symptomatic heart disease. *J Am Soc Nephrol* 2005; 16:2180-9.
74. Parfrey PS, Lauve M, Latremouille-Viau D, Lefebvre P. Erythropoietin therapy and left ventricular mass index in CKD and ESRD patients: a meta-analysis. *Clin J Am Soc Nephrol* 2009; 4:755-62.
75. Wang AY, Sanderson J, Sea MM, *et al.* Important factors other than dialysis adequacy associated with inadequate dietary protein and energy intakes in patients receiving maintenance peritoneal dialysis. *Am J Clin Nutr* 2003; 77:834-41.
76. Asci G, Ozkahya M, Duman S, Toz H, Erten S, Ok E. Volume control associated with better cardiac function in long-term peritoneal dialysis patients. *Perit Dial Int* 2006; 26:85-8.
77. Ritz E, Dikow R, Adamczak M, Zeier M. Congestive heart failure due to systolic dysfunction: the Cinderella of cardiovascular management in dialysis patients. *Semin Dial* 2002;15:135-40.
78. Ozkahya M, Ok E, Cirit M, *et al.* Regression of left ventricular hypertrophy in haemodialysis patients by ultrafiltration and reduced salt intake without antihypertensive drugs. *Nephrol Dial Transplant* 1998;13:1489-93.
79. Gunal AI, Karaca I, Aygen B, Yavuzkir M, Dogukan A, Celiker H. Strict fluid volume control and left ventricular hypertrophy in hypertensive patients on chronic haemodialysis: a cross-sectional study. *J Int Med Res* 2004; 32:70-7.
80. Cordaillat M, Reboul C, Gaillard V, Lartaud I, Jover B, Rugale C. Plasma volume and arterial stiffness in the cardiac alterations associated with long-term high sodium feeding in rats. *Am J Hypertens* 2011;24:451-7.
81. Davies SJ, Woodrow G, Donovan K, *et al.* Icodextrin improves the fluid status of peritoneal dialysis patients: results of a double-blind randomized controlled trial. *J Am Soc Nephrol* 2003;14:2338-44.
82. Konings CJ, Kooman JP, Schonck M, *et al.* Effect of icodextrin on volume status, blood pressure and echocardiographic parameters: a randomized study. *Kidney Int* 2003; 63:1556-63.
83. Weishaar RE, Simpson RU. Involvement of vitamin D3 with cardiovascular function. II. Direct and indirect effects. *Am J Physiol* 1987;253:E675-83.
84. Weishaar RE, Simpson RU. Vitamin D3 and cardiovascular function in rats. *J Clin Invest* 1987;79:1706-12.
85. Weishaar RE, Simpson RU. The involvement of the endocrine system in regulating cardiovascular function: emphasis on vitamin D3. *Endocr Rev* 1989; 10:351-65.
86. Weishaar RE, Kim SN, Saunders DE, Simpson RU. Involvement of vitamin D3 with cardiovascular function. III. Effects on physical and morphological properties. *Am J Physiol* 1990; 258:E134-42.
87. Wang AY, Lam CW, Sanderson JE, *et al.* Serum 25-hydroxyvitamin D status and cardiovascular outcomes in chronic peritoneal dialysis patients: a 3-y prospective cohort study. *Am J Clin Nutr* 2008;87:1631-8.
88. McGonigle RJ, Fowler MB, Timmis AB, Weston MJ, Parsons V. Uremic cardiomyopathy: potential role of vitamin D and parathyroid hormone. *Nephron* 1984; 36:94-100.
89. Thadhani R, Appelbaum E, Pritchett Y, *et al.* Vitamin D therapy and cardiac structure and function in patients with chronic kidney disease: the PRIMO randomized controlled trial. *JAMA* 2012;307:674-84.
90. Wang AY, Fang F, Chan J, *et al.* Effect of Paricalcitol on Left Ventricular Mass and Function in CKD--The OPERA Trial. *J Am Soc Nephrol* 2014; 25:175-86.
91. Bleeker GB, Bax JJ, Steendijk P, Schalij MJ, van der Wall EE. Left ventricular dyssynchrony in patients with heart failure: pathophysiology, diagnosis and treatment. *Nat Clin Pract Cardiovasc Med* 2006; 3:213-9.
92. Shin SH, Hung CL, Uno H, *et al.* Mechanical dyssynchrony after myocardial infarction in patients with left ventricular dysfunction, heart failure, or both. *Circulation* 2010;121:1096-103.

93. Penicka M, Bartunek J, Lang O, *et al.* Severe left ventricular dyssynchrony is associated with poor prognosis in patients with moderate systolic heart failure undergoing coronary artery bypass grafting. *J Am Coll Cardiol* 2007; 50:1315-23.
94. Abraham WT, Fisher WG, Smith AL, *et al.* Cardiac resynchronization in chronic heart failure. *N Engl J Med* 2002; 346:1845-53.
95. Bristow MR, Saxon LA, Boehmer J, *et al.* Cardiac-resynchronization therapy with or without an implantable defibrillator in advanced chronic heart failure. *N Engl J Med* 2004; 350:2140-50.
96. Cleland JG, Daubert JC, Erdmann E, *et al.* The effect of cardiac resynchronization on morbidity and mortality in heart failure. *N Engl J Med* 2005; 352:1539-49.
97. McAlister FA, Ezekowitz JA, Wiebe N, *et al.* Systematic review: cardiac resynchronization in patients with symptomatic heart failure. *Ann Intern Med* 2004;141:381-90.
98. Bradley DJ, Bradley EA, Baughman KL, *et al.* Cardiac resynchronization and death from progressive heart failure: a meta-analysis of randomized controlled trials. *JAMA* 2003; 289:730-40.
99. Silaruks S, Sirivongs D, Chunlertrith D. Left ventricular hypertrophy and clinical outcome in CAPD patients. *Perit Dial Int* 2000; 20:461-6.
100. Edwards NC, Ferro CJ, Kirkwood H, *et al.* Effect of spironolactone on left ventricular systolic and diastolic function in patients with early stage chronic kidney disease. *Am J Cardiol* 2010; 106:1505-11.
101. Akbari A, Knoll G, Ferguson D, McCormick B, Davis A, Biyani M. Angiotensin-converting enzyme inhibitors and angiotensin receptor blockers in peritoneal dialysis: systematic review and meta-analysis of randomized controlled trials. *Perit Dial Int* 2009; 29:554-61.
102. Wali RK, Iyengar M, Beck GJ, *et al.* Efficacy and safety of carvedilol in treatment of heart failure with chronic kidney disease: a meta-analysis of randomized trials. *Circ Heart Failure* 2011; 4:18-26.
103. Macdougall IC, Temple RM, Kwan JT. Is early treatment of anaemia with epoetin-alpha beneficial to pre-dialysis chronic kidney disease patients? Results of a multicentre, open-label, prospective, randomized, comparative group trial. *Nephrol Dial Transplant* 2007; 22:784-93.
104. Ritz E, Laville M, Bilous RW, *et al.* Target level for hemoglobin correction in patients with diabetes and CKD: primary results of the Anemia Correction in Diabetes (ACORD) Study. *Am J Kidney Dis* 2007; 49:194-207.
105. Ayus JC, Go AS, Valderrabano F, *et al.* Effects of erythropoietin on left ventricular hypertrophy in adults with severe chronic renal failure and hemoglobin <10 g/dL. *Kidney Int* 2005; 68:788-95.
106. Levin A, Djurdjev O, Thompson C, *et al.* Canadian randomized trial of hemoglobin maintenance to prevent or delay left ventricular mass growth in patients with CKD. *Am J Kidney Dis* 2005;46:799-811.
107. Roger SD, McMahan LP, Clarkson A, *et al.* Effects of early and late intervention with epoetin alpha on left ventricular mass among patients with chronic kidney disease (stage 3 or 4): results of a randomized clinical trial. *J Am Soc Nephrol* 2004;15:148-56.

## SECTION 3. STROKE

**Guideline 3.3.1: We suggest carotid duplex ultrasonography be performed in peritoneal dialysis patients with transient ischemic attack or acute thromboembolic stroke to identify presence of significant carotid artery stenosis. (ungraded)**

### Rationale

There is very limited evidence to guide routine screening for cerebrovascular disease in dialysis patients. One prospective observational study of carotid duplex screening in 123 patients undergoing hemodialysis (HD) via permanent tunneled cuffed catheter identified  $\geq 60\%$  carotid stenosis in 12 (10%) patients and 70–99% carotid stenosis in 8 (7%) patients (1). However, there is so far no study showing how early screening of carotid artery stenosis may improve clinical outcomes or reduce stroke risk in dialysis or specifically peritoneal dialysis (PD) patients. In the absence of good quality evidence, the National Kidney Foundation Kidney Disease Outcomes Quality Initiative (NKF-KDOQI 2005) Guidelines on evaluation and management of cardiovascular diseases recommend following the American Heart Association (AHA) Guidelines for the evaluation of stroke. Specifically, the AHA guidelines recommend that computed tomography of the brain should be performed to evaluate patients with transient ischemic attack (TIA) or acute stroke in order to localize the site of stroke and establish the cause (whether hemorrhagic or non-hemorrhagic) and carotid duplex scan to identify significant carotid stenoses in patients with a history of TIA or stroke (2). Given the lack of evidence in dialysis patients including PD patients, the workgroup suggests following a similar approach recommended by the AHA in managing PD patients with TIA or stroke and the statement was ungraded. [Evidence Review Table 1]

**Guideline 3.3.2: We suggest peritoneal dialysis patients not be routinely prescribed antiplatelet therapy for primary prevention of cerebrovascular disease. (2C)**

### Rationale

The AHA Guidelines for Primary Prevention of Stroke for the general population recommend the use of low-dose aspirin for the primary prevention of stroke in the general population for those considered to be at high cardiovascular risk, but not for those at low risk (3). However, the role of aspirin for primary prevention of stroke in PD patients is uncertain. A recent Cochrane review evaluating the effects of antiplatelet therapy on cardiovascular events, mortality and bleeding in 11,701 patients with chronic kidney disease (CKD) and with either stable or no cardiovascular disease found that antiplatelet therapy was associated with uncertain effects on stroke (10 trials, 9133 participants; RR, 0.66 [CI, 0.16 to 2.78]), a significantly increased risk of minor bleeding (RR 1.70, 95% CI 1.44-2.02) but had uncertain effects on major bleeding (RR, 1.29 [CI, 0.69 to 2.42]) (4). Given the uncertain benefit of antiplatelet therapy for primary stroke prevention and risk of bleeding in patients with CKD, the working group felt that PD patients should not routinely be prescribed antiplatelet therapy for primary prevention of cerebrovascular disease. [Evidence Review Table 2].

**Guideline 3.3.3: We suggest individualization of warfarin prescription for prevention of stroke in peritoneal dialysis patients with atrial fibrillation in view of an increased risk of bleeding and uncertain effects on cerebrovascular outcomes. (2D)**

**Rationale**

Although antithrombotic therapy is recommended by the AHA Guidelines for prevention of stroke for patients with atrial fibrillation in the general population (5), all the trials upon which this recommendation was based excluded dialysis patients. The risk to benefit ratio of warfarin for stroke prevention in dialysis patients with atrial fibrillation has remained uncertain. A systematic review of eight studies (included case series, cohort studies and randomized controlled trials (RCTs) evaluating warfarin therapy in HD patients found that the rates of major bleeding episodes ranged from 0.1 to 0.54 events/patient-year with warfarin exposure and were approximately twice the rate expected in HD patients receiving either no warfarin or subcutaneous heparin (6). Furthermore, a systematic review and meta-analysis of 25 studies (included cross sectional and cohort studies) by Zimmerman in 2012 evaluating outcomes of stroke in dialysis patients with atrial fibrillation found that, while the incidence and prevalence of atrial fibrillation was higher than that found in the general population and associated with about a two-fold increased risk of stroke and mortality, overall, warfarin use did not appear to decrease the risk of the combined outcome of hemorrhagic and ischemic stroke, especially in the larger studies (7). While there have been further population-based, retrospective and observational studies published recently on this topic, they all have limitations, including lack of information on monitoring of the international normalized ratio (INR) with the usual target of between 2 and 3, and confounding by indication bias (patients who were most likely to have strokes possibly being preferentially treated with warfarin) and these studies have, thus, not been included for review in this section.

The NKF-KDOQI 2005 Guidelines caution that “dialysis patients are at an increased risk of bleeding and careful monitoring should accompany intervention”(9.2a) with thrombolytics for atrial fibrillation (8). The *Kidney Disease: Improving Global Outcomes (KDIGO) 2011 Clinical Update*, given the lack of RCTs and uncertain outcomes of primary prevention of stroke in HD patients, questioned the efficacy of the use of routine anticoagulation for primary prevention of stroke in CKD patients with atrial fibrillation on dialysis (9). While, for secondary prevention of stroke, they felt that the NKF-KDOQI 2005 Guidelines should be followed. Presumably this caution of increased bleeding risk with use of thrombolytics in HD patients also extends to PD patients. However, the KDIGO 2011 Clinical Update also suggested that, unlike HD patients who receive systemic heparin for anti-coagulation during HD, PD patients do not routinely receive systemic heparin and, thus, the risk to benefit ratio for warfarin use in PD patients may be modified compared to HD patients. The working group felt that warfarin prescription for prevention of stroke in PD patients with atrial fibrillation should be individualized by considering not only the cerebrovascular risk but also the bleeding risk. The strength of this recommendation was weak, given the uncertainty of the risk to benefit ratio of routine anticoagulation for patients on PD with atrial fibrillation. [Evidence Review Table 3]

**Guideline 3.3.4: We do not recommend the use of novel oral anticoagulants to prevent stroke in atrial fibrillation in peritoneal dialysis patients. (1D)**

**Rationale**

While new oral anticoagulants are now available to prevent stroke in patients with atrial fibrillation, all these new oral anticoagulants are mostly cleared by the kidney. There is very little

data from clinical trials or clinical experience on patients on dialysis or close to dialysis with these drugs and they are contraindicated in patients with CKD stage 5 on dialysis (10,11). Thus, we do not recommend use of these new oral anticoagulants for stroke prevention in patients on PD with atrial fibrillation.

**Guideline 3.3.5: We suggest caution with administration of thrombolytic therapy to peritoneal dialysis patients with acute ischemic stroke in view of uncertainty regarding whether benefits outweigh risks. (ungraded)**

### Rationale

In the absence of high level evidence in dialysis patients, the NKF-KDOQI 2005 Guidelines recommend following the AHA Guidelines for the treatment of TIA or stroke in dialysis patients, with the exception of the use of thrombolytic therapy, where the NKF-KDOQI 2005 Guidelines recommend that the use of thrombolytic therapy should be considered on an individual basis (8). The more recently published KDIGO 2011 Clinical Update pointed out that the safety of IV thrombolytic therapy for treatment of acute ischemic stroke in patients on dialysis still has not been defined (9). A recent e-published ahead of print retrospective analysis of 82,142 patients with an acute ischemic stroke in the United States who received IV thrombolytics found that in the 1072 (1.3%) patients who were on dialysis (1007 on HD and 65 on PD), there was an almost two-fold higher rate of in-hospital mortality (odds ratio, 1.92; 95% CI, 1.33-2.78,  $p = .0005$ ) compared to those not on dialysis. Of note, there was no significant difference in intracerebral hemorrhage rates between those on dialysis and those not on dialysis. The study could not determine whether the higher mortality rate was related to the IV thrombolytic therapy or the pre-existing comorbidities in those patients on dialysis (12). The workgroup felt that the current available evidence is insufficient to draw any recommendation in relation to the use of thrombolytic agents as a treatment of acute ischemic stroke. Nevertheless, the workgroup felt that a very careful assessment of risks versus benefits must be undertaken before administering intravenous thrombolytics for treatment of acute ischemic stroke in dialysis patients, including PD patients. [Evidence Review Table 4]

### What is the evidence for prevention of recurrent stroke in patients on peritoneal dialysis?

There are few studies examining the safety and effectiveness of antiplatelet therapy to reduce the risk of recurrent stroke in patients on dialysis. One large retrospective study from Taiwan of 1936 dialysis patients (included both HD and PD patients) with a first-time ischemic stroke found that those treated with aspirin only (763) were less likely to be readmitted for recurrent ischemic stroke than those not treated with aspirin (aHR: 0.715;  $P = 0.002$ ). Moreover, there was no increase in risk of readmission for bleeding in those patients treated with aspirin only compared to those not treated with aspirin (aHR: 0.885; 95% CI: 0.705-1.11;  $P=0.291$ ). However, for those dialysis patients treated with clopidogrel only (146), there was no significant difference in risk of readmission for ischemic stroke compared to those not treated with clopidogrel. The authors felt that aspirin was safe and effective for patients on dialysis to prevent recurrent stroke; but advised that this retrospective study only included Han Chinese, thus, generalization of these results to other racial or ethnic groups has to be made with caution. Also, since the study was retrospective, certain data such as smoking history or history of bleeding were not available. Unfortunately, the study authors did not differentiate between outcomes for patients on HD versus those on PD (13).

While the AHA Guidelines recommend daily aspirin for patients who have a TIA or stroke to reduce the risk of recurrent stroke and an antiplatelet agent such as clopidogrel for patients who are

intolerant to aspirin or who have had a stroke while on aspirin (2), the NKF-KDOQI 2005 Guidelines note that dialysis patients are at risk for bleeding and caution should be taken when prescribing antiplatelet or anticoagulant therapy in these patients (8). The more recently published KDIGO 2011 Clinical Update (9) suggests that, until new evidence becomes available, the previous 2005 NKF-KDOQI recommendations remain valid. The workgroup felt that there is not enough quality evidence to recommend routine use of anti-platelet agents for secondary prevention of ischemic stroke in all PD patients. The decision on anti-platelet agent prescription for secondary prevention of stroke in PD patients should be individualized and balanced against the bleeding risk. The workgroup also suggest careful monitoring of bleeding-related complications if an anti-platelet agent is indeed prescribed for stroke prevention in PD patients and the statement was ungraded; however, as a group we decided against this recommendation being part of the guidelines.



**Evidence Review Table 1.** Studies that examined the use of carotid duplex screening to assess risk for stroke

| Reference                                 | Population                                                                                                                                       | Patient number | Study design                              | Outcomes of interest                                                                                   | Follow-up duration (if applicable) | Results                                                                                                                                                                                                                                                                                                                                                | Study quality |
|-------------------------------------------|--------------------------------------------------------------------------------------------------------------------------------------------------|----------------|-------------------------------------------|--------------------------------------------------------------------------------------------------------|------------------------------------|--------------------------------------------------------------------------------------------------------------------------------------------------------------------------------------------------------------------------------------------------------------------------------------------------------------------------------------------------------|---------------|
| Lin et al Vasc Endovascular Surg 2012 (1) | Patients undergoing dialysis catheter placement plus those who underwent aortorenal artery duplex study in a single centre in the United States. | 123            | Single centre, prospective, observational | To identify hemodialysis patients at increased risk for vascular disease (carotid, renal, and aortic). | N/A                                | For the 123 HD patients who underwent a dialysis catheter placement, 12 patients (9.8%) had $\geq 60\%$ stenosis and 8 patients (6.5%) had 70% to 99% stenosis.<br><br>For the 109 HD patients who underwent an aortorenal artery duplex study, there was only a 3.7% prevalence rate for abdominal aorta aneurysm and 4.6% for renal artery stenosis. | C             |

HD = hemodialysis; N/A = not applicable

**Evidence Review Table 2.** Studies that examined the use of antiplatelet therapy in peritoneal dialysis patients for primary prevention of stroke

| Reference                            | Population                                                                                                                             | Patient number                                                                      | Study design                        | Outcomes of interest                                                             | Follow-up duration (if applicable) | Results                                                                                                                                                                                                                                                                                                                                                                                                                                                                                                                              | Study quality |
|--------------------------------------|----------------------------------------------------------------------------------------------------------------------------------------|-------------------------------------------------------------------------------------|-------------------------------------|----------------------------------------------------------------------------------|------------------------------------|--------------------------------------------------------------------------------------------------------------------------------------------------------------------------------------------------------------------------------------------------------------------------------------------------------------------------------------------------------------------------------------------------------------------------------------------------------------------------------------------------------------------------------------|---------------|
| Palmer et al Ann Intern Med 2012 (4) | Systematic review of RCTs that included adults with CKD and compared antiplatelet agents with standard care, placebo, or no treatment. | 9 trials (acute coronary syndrome); 31 trials (stable or no cardiovascular disease) | Systematic review and meta-analysis | The effects of antiplatelet therapy on cardiovascular events, death and bleeding | Not applicable                     | Among CKD patients at risk for or with stable cardiovascular disease, moderate-quality evidence showed that antiplatelet therapy reduced myocardial infarction (10 trials, 9133 participants; RR, 0.66 [CI, 0.51 to 0.87]) but had uncertain effects on stroke (10 trials, 9133 participants; RR, 0.66 [CI, 0.16 to 2.78]). There was low-quality evidence that antiplatelet therapy significantly increased minor bleeding (RR, 1.70 [CI, 1.44 to 2.02]) but had uncertain effects on major bleeding (RR, 1.29 [CI, 0.69 to 2.42]). | A             |

RCTs = randomized controlled trials; CKD = chronic kidney disease; RR = relative risk; CI = confidence interval.

**Evidence Review Table 3.** Studies that examined the use of antithrombotic therapy for peritoneal dialysis patients with atrial fibrillation

| Reference                                 | Population                                                                                                                                                                              | Patient number | Study design                        | Outcomes of interest                                                                                                                 | Follow-up duration (if applicable) | Results                                                                                                                                                                                                                                                                                                                                                                                                                                                                                                      | Study quality |
|-------------------------------------------|-----------------------------------------------------------------------------------------------------------------------------------------------------------------------------------------|----------------|-------------------------------------|--------------------------------------------------------------------------------------------------------------------------------------|------------------------------------|--------------------------------------------------------------------------------------------------------------------------------------------------------------------------------------------------------------------------------------------------------------------------------------------------------------------------------------------------------------------------------------------------------------------------------------------------------------------------------------------------------------|---------------|
| Elliott et al<br>Am J Kidney Dis 2007 (6) | Systematic review of case series, cohort studies and RCTs in HD patients that examined the bleeding risk associated with warfarin use compared with no warfarin or subcutaneous heparin | 8 studies      | Systematic review                   | Data for bleeding were reported as rates: number of bleeding episodes per number of patient-years of warfarin exposure or follow-up. | Not applicable                     | Studies of full-intensity anticoagulation and the 1 randomized controlled trial of low-intensity anticoagulation demonstrated major bleeding episode rates ranging from 0.1 to 0.54 events/patient-year of warfarin exposure. When compared to bleeding rates of HD patients who received no heparin or subcutaneous heparin, these rates were approximately doubled.                                                                                                                                        | A             |
| Zimmerman et al NDT 2012 (7)              | Systematic review and meta-analysis cross-sectional and cohort studies of incidence, prevalence or selected outcomes of CKD stage 5 patients on dialysis with atrial fibrillation       | 25 studies     | Systematic review and meta-analysis | Incidence, prevalence or selected outcomes in CKD stage 5 patients on dialysis with atrial fibrillation                              | Not applicable                     | The prevalence of atrial fibrillation was 11.6% and the overall incidence was 2.7/100 patient-years. The risk of mortality and stroke was increased in CKD stage 5 patients on dialysis with atrial fibrillation at 26.9 and 5.2/ 100 patient-years versus 13.4 and 1.9/100 patient-years compared with CKD stage 5 patients on dialysis without atrial fibrillation. The majority of studies did not support a protective effect for warfarin in CKD stage 5 on dialysis patients with atrial fibrillation. | A             |

RCTs = randomized controlled trials; HD = hemodialysis; CKD = chronic kidney disease

**Evidence Review Table 4.** Studies that examined the use of intravenous thrombolytics in peritoneal dialysis patients with acute stroke

| Reference                                             | Population                                                                                                                                                             | Patient number                                   | Study design                            | Outcomes of interest                                                                                                                                                                                                          | Follow-up duration (if applicable)                                                                        | Results                                                                                                                                                                                                                               | Study quality |
|-------------------------------------------------------|------------------------------------------------------------------------------------------------------------------------------------------------------------------------|--------------------------------------------------|-----------------------------------------|-------------------------------------------------------------------------------------------------------------------------------------------------------------------------------------------------------------------------------|-----------------------------------------------------------------------------------------------------------|---------------------------------------------------------------------------------------------------------------------------------------------------------------------------------------------------------------------------------------|---------------|
| Tariq et al<br><br>J Stroke Cerebrovasc Dis 2013 (12) | Nationwide sample of patients from the United States (2002-2009), from the National Inpatient Sample database) treated with IV thrombolytics for acute ischemic stroke | 82,142<br><br>(1072 on dialysis: 1007 HD; 65 PD) | Retrospective, nationwide observational | To determine the outcomes of dialysis dependent renal failure patients who had ischemic stroke and were treated with IV thrombolytics compared to the outcomes with thrombolytic-treated patients without dialysis dependence | Median length of hospital stay - 14.24 days for dialysis patients and 7.12 days for non-dialysis patients | There was a high rate of In-hospital mortality in dialysis-dependent renal failure patients treated with IV thrombolytics for acute ischemic stroke compared to those not dialysis dependent (OR 1.92; CI 95%; 1.33-2.78, p = 0.0005) | <b>C</b>      |

HD = hemodialysis; IV = intravenous; OR = odds ratio; CI = confidence interval

## References

1. Lin R, Hingorani A, Marks N, Ascher E, Jimenez R, Aboian E, *et al.* Screening for carotid artery stenosis and renal artery stenosis in patients undergoing tunneled cuffed hemodialysis catheter placement. *Vasc Endovascular Surg* 2012; Jul 46(5): 364-8.
2. Furie KL, Kasner SE, Adams RJ, Albers GW, Bush RL, Fagan SC, *et al.* Guidelines for the prevention of stroke in patients with stroke or transient ischemic attack: A guideline for healthcare professionals from the American Heart Association/American Stroke Association. *Stroke* 2011; 42: 227-76.
3. Goldstein LB, Bushnell CD, Adams RJ, Appel LJ, Braun LT, Chaturvedi S *et al.* Guidelines for the primary prevention of stroke: a guideline for healthcare professionals from the American Heart Association/American Stroke Association. *Stroke* 2011; 42: 517-84.
4. Palmer SC, Di Micco L, Razavian M, Craig JC, Perkovic V, Pellegrini F, *et al.* Effects of antiplatelet therapy on mortality and cardiovascular and bleeding outcomes in persons with chronic kidney disease: A systematic review and meta-analysis. *Ann Intern Med* 2012; 156: 445-59.
5. Furie KL, Goldstein LB, Albers GW, Khatri P, Neyens R, Turakhia MP, *et al.* Oral antithrombotic agents for the prevention of stroke in nonvalvular atrial fibrillation: A science advisory for healthcare professionals from the American Heart Association/American Stroke Association. *Stroke* 2012; 43: 3442-53.
6. Elliott MJ, Zimmerman D, Holden RM. Warfarin anticoagulation in hemodialysis patients: a systematic review of bleeding rates. *Am J Kidney Dis* 2007; Sep 50(3): 433-40.
7. Zimmerman, D, Sood MM, Rigatto C, Holden RM, Hiremath S, Clase CM. Systematic review and meta-analysis of incidence, prevalence and outcome of atrial fibrillation in patients on dialysis. *Nephrol Dial Transplant* 2012; 27: 3816-22.
8. National Kidney Foundation. K/DOQI Clinical Practice Guidelines for Cardiovascular Disease in Dialysis Patients. *Am J Kidney Dis* 2005 (suppl 3) 45: S1-S154.
9. Herzog CA, Asinger RW, Berger AK, Charytan DM, Díez J, Hart, RG, *et al.* Cardiovascular disease in chronic kidney disease. A clinical update from Kidney Disease: Improving Global Outcomes (KDIGO). *Kidney Int* 2011; 80: 572-86.
10. Heidebuchel H, Verhamme P, Alings M, Antz M, Hacke W, Oldgren J, *et al.* EHRA practical guide on the use of new oral anticoagulants in patients with non-valvular atrial fibrillation: Executive summary. *Eur Heart J*. 2013; 34(27): 2094-106.
11. Cove CL, Hylek EM. An updated review of target-specific oral anticoagulants used in stroke prevention in atrial fibrillation, venous thromboembolic disease, and acute coronary syndromes. *J Am Heart Assoc* 2013. DOI:10.1161/JAHA.113.000136
12. Tariq N, Adil MM, Saeed F, Chaudhry SA, Qureshi AI. Outcomes of thrombolytic treatment for acute ischemic stroke in dialysis-dependent patients in the United States. *J Stroke Cerebrovasc Dis* 2013 Nov; 22(8): e354-59. doi: 10.1016/j.jstrokecerebrovasdis.2013.03.016. *Epub* 2013 Apr 28.
13. Chen CY, Lee KT, Lee CTC, Lai WT, Huang YB. Effectiveness and safety of antiplatelet in stroke patients with end-stage renal disease undergoing dialysis. *Int J Stroke* 2014 E-pub 2014 Mar 5. DOI: 10.1111/ijvs.12254.

## SECTION 4. PERIPHERAL ARTERIAL DISEASE

### A. Screening

**Guideline 3.4.1: We recommend peritoneal dialysis patients, particularly those with diabetes mellitus, have regular clinical evaluation for peripheral arterial disease (including inquiry of symptoms of intermittent claudication and rest pain, examination of signs for peripheral arterial disease, and palpation of peripheral arterial pulses). (1D)**

#### Rationale

Peripheral arterial disease (PAD), defined as either asymptomatic abnormalities on non-invasive Doppler ultrasound testing, intermittent claudication, critical limb ischemia (rest pain, ischemic ulceration or gangrene) or prior revascularization or amputation for limb ischemia, is exceedingly common in patients with chronic kidney disease (CKD) and is responsible for considerable morbidity and mortality (1) [Evidence Review Table 1]. A cross-sectional study of 2229 eligible participants in the National Health and Nutrition Examination Survey (NHANES) 1999 to 2000 found that the prevalence of PAD, defined as an ABI  $\leq 0.9$ , was markedly higher in patients with a creatinine clearance of  $<60$  mL/min/1.73 m<sup>2</sup> compared with those who had a creatinine clearance  $>60$  mL/min/1.73 m<sup>2</sup> (24% vs 3.7%, respectively) (2). Other observational cohort studies, using variable combinations of clinical and/or ABI diagnostic criteria, have reported PAD prevalence rates ranging from 7.4%-22% in CKD stages 3-5 (3-7), 30.6%-45.9% in hemodialysis (HD) patients (7-12) and 15-30% in renal transplant patients (9, 10). In these studies, the majority of patients with a diagnosis of PAD were asymptomatic. Nevertheless, PAD is the commonest indication for amputation in end stage renal disease (ESRD) patients. Non-traumatic lower limb amputation is approximately 10 times more common in the ESRD population compared with non-ESRD patients (1, 13). Following amputation, ESRD patients' survival remains extremely poor with reported 2-year survival rates of  $<33\%$  (13, 14).

There are no studies in PD patients, or indeed in any CKD populations, examining the impact of screening versus not screening for PAD on clinical outcomes. Until recently, very few studies had evaluated peritoneal dialysis (PD) patients for PAD. Most studies have taken place in the last 2-3 years and are summarized in Evidence Review Table 1. These studies have generally been limited by small sample sizes, single centre design, small follow-up duration, ascertainment bias, Neyman bias, lack of an appropriate control group, lack of assessment against angiography or prediction of future lower limbs vascular complications. Overall, the median reported prevalence of PAD in PD patients is 28.5% (range, 4.8%-47%), with the majority (59%-84%) having subclinical PAD. PAD was most commonly independently predicted by diabetes, older age and prior cardiovascular disease and was a strong predictor of adverse clinical outcomes, including residual renal function decline, technique failure, cardiovascular mortality and all-cause mortality (including subclinical PAD).

Although there are no studies comparing routine clinical evaluation of stage 5 CKD patients for PAD versus evaluation only in response to symptoms, the National Kidney Foundation-Kidney Disease Outcome Quality Initiative (NKF-KDOQI) guidelines recommend, on the basis of weak evidence, that all patients should be evaluated for PAD at the time of dialysis initiation, including physical assessment of arterial pulse and skin integrity and further specialized studies, such as duplex studies or invasive testing, if abnormalities are detected on physical examination (15). Alternatively, the Kidney Disease Improving Global Outcomes (KDIGO) cardiovascular guidelines state that "screening guidelines are problematic for clinicians because of the lack of clarity regarding diagnostic testing and optimal therapies for PAD in CKD" (16). Nevertheless, the KDIGO

CKD Guidelines recommend that “adults with CKD be regularly examined for signs of PAD and be considered for usual approaches to therapy (1B)” and that “adults with CKD and diabetes are offered regular podiatric assessment (2A)” (17). No recommendations are made by the Caring for Australasians with Renal Insufficiency (CARI), European Best Practice (EBPG), Canadian Society of Nephrology (CSN) or United Kingdom National Clinical Institutes of Excellence (UK-NICE) Guidelines. Given the high prevalence of PAD and subclinical PAD in PD patients, especially among the diabetics, and the very adverse clinical outcomes associated with PAD, the working group felt that a strong recommendation should be given for regular clinical evaluation of PAD in PD patients.

**Guideline 3.4.2: We suggest an ankle-brachial index  $\leq 0.9$  be used to aid in the diagnosis of peripheral arterial disease in peritoneal dialysis patients. (2D)**

**Rationale**

The most common screening test employed to detect PAD in studies of PD patients was an ABI [Evidence Review Table 1], which has been recommended for general population screening in at-risk patients by the American College of Cardiology (ACC)/American Heart Association (AHA) (18) or in patients with suspected PAD by the Trans-Atlantic Inter-Society Consensus Document on Management of Peripheral Arterial Disease (TASC II) guidelines (19), although the United States Preventive Services Task Force (USPTF) does not advocate screening of asymptomatic individuals because of questionable risk: benefit (20). Most studies in PD patients used a cut-point of  $\leq 0.9$  to define PAD, as this threshold has been reported to have a sensitivity of 95% and a specificity of 100% for PAD detection in patients without CKD (21, 22). There are no studies examining the sensitivity and specificity of ABI in PD (or hemodialysis [HD] or CKD) patients specifically.

The working group felt that there is currently not enough evidence to support routine ABI assessment as a screening test for PAD in PD patients. Nevertheless, if ABI is performed, a cutoff  $\leq 0.9$  is suggested by the working group to be used to aid the diagnosis of PAD.

**Guideline 3.4.3: We suggest a toe-brachial index  $\leq 0.6$  be used in addition to the ankle-brachial index to aid in the diagnosis of peripheral arterial disease in symptomatic patients in whom the ankle-brachial index is unreliable due to non-compressible vessels (such as when the ankle-brachial index  $\geq 1.3$ ). (2D)**

**Rationale**

It has been suggested that the high prevalence of medial arterial calcification in the CKD population (particularly in diabetic patients) would lead to an underestimation of the true prevalence of PAD by ABI (1, 23, 24). In a prospective, cross-sectional study of 102 CKD patients (including 20 PD patients), An et al (25) reported a prevalence of vascular calcification (based on plain radiographs of the foot) of 50% and observed that ABI values were not discriminatory between those with and without vascular calcification. On the other hand, Leskinen et al (7) reported ABI measurements  $\geq 1.3$  to be suggestive of medial arterial calcification in 42% of dialysis patients. In patients with such abnormally high ABI values, the AHA/ACC and TASC II guidelines recommend measuring toe-brachial index (TBI) as toe arteries are less likely to be affected by vascular calcification compared with ankle arteries (18, 19, 26). Unfortunately, TBI has only been evaluated to a very limited extent in CKD populations and there are only 2 such studies in PD patients (7, 27) [Evidence Review Table 1]. One investigation of 146 PD patients found that ABI was highly correlated with toe brachial index (TBI) ( $r=0.335$ ,  $p<0.001$ ), but did not evaluate the clinical performance of these two measurements relative to color Doppler, angiography or prediction of future limb vascular complications (27). Similarly, Leskinen *et al* (7) reported low ABI

and TBI values in 31% and 19% of dialysis patients, respectively, although the addition of low TBI to low ABI did not affect the overall prevalence estimates of PAD.

There are no studies examining the sensitivity and specificity of TBI in PD (or HD or CKD) patients specifically. The cut-points recommended in this guideline are in line with those recommended in the non-CKD population by the AHA/ACC and TASC II guidelines (18, 19).

### **Other Potential Investigations**

Other non-invasive screening tests for PAD, such as transcutaneous partial pressure of oxygen readings (28) and toe pulse volume recordings (29), have not been evaluated in the dialysis population.

**Evidence Review Table 1.** Studies that examined the prevalence of peripheral arterial disease on the basis of clinical manifestations and/or investigations such as ankle-brachial index, toe-brachial index, Doppler studies, vascular calcification or arteriography.

| Reference                     | Population                                                                                                                                                     | Patient number | Study design                                         | Outcomes of interest                                                                                                 | Follow up duration (if applicable)                             | Results                                                                                                                                                                                                                                                                                                                                        | Study quality |
|-------------------------------|----------------------------------------------------------------------------------------------------------------------------------------------------------------|----------------|------------------------------------------------------|----------------------------------------------------------------------------------------------------------------------|----------------------------------------------------------------|------------------------------------------------------------------------------------------------------------------------------------------------------------------------------------------------------------------------------------------------------------------------------------------------------------------------------------------------|---------------|
| Tian et al, Ren Fail 2012(30) | Incident/prevalent CAPD patients >60 years old clinically stable $\geq 3$ months at single Chinese center 2006-2009                                            | 172            | Prospective, longitudinal observational cohort study | Prevalence of PAD (intermittent claudication or ABI <0.9)<br><br>All-cause mortality<br><br>Cardiovascular mortality | Mean 24.4 months<br><br>Median 34.6 months (range 5-45 months) | Prevalence of PAD: 36% (64% in diabetics) (84% asymptomatic)<br><br>PAD predicted by diabetes and cardiovascular disease<br><br>PAD independently predicted all-cause mortality (adjusted HR: 2.14, 95% CI 1.11-4.13, p=0.023) and cardiovascular mortality (adjusted HR: 2.54, 95% CI 1.07-6.04, p=0.035)                                     | C             |
| Tian et al PDI 2012 (31)      | Incident CAPD patients at single Chinese centre 2006-2007 who did not die, transfer to HD, receive treatment or transfer to other center within first 3 months | 86             | Prospective, longitudinal observational cohort study | Prevalence of subclinical PAD (ABI <0.9)                                                                             | Mean 19 months<br><br>Median 18months (range 6-30 months)      | Prevalence of subclinical PAD: 28% (62% in diabetics)<br><br>PAD associated with older age, diabetes mellitus, lower serum albumin, higher CRP and higher baseline GFR<br><br>PAD (but not coronary artery and cerebrovascular disease) independently predicted >50% of residual renal function (adjusted HR: 2.68, 95% CI 1.35-5.30, p=0.005) | C             |
| Webb and Brown PDI 1993 (32)  | Prevalent CAPD patients at a single center in the United Kingdom                                                                                               | 70             | Cross-sectional, observational cohort study          | Prevalence of PAD (using a standard cardiovascular questionnaire)                                                    | -                                                              | Prevalence of symptomatic vascular disease: 47%                                                                                                                                                                                                                                                                                                | C             |



|                            |                                                                                      |                                                                         |                                                            |                                                                                                                                                                                     |                |                                                                                                                                                                                                                                                                                                                                                                                                                                                                                                                                 |   |
|----------------------------|--------------------------------------------------------------------------------------|-------------------------------------------------------------------------|------------------------------------------------------------|-------------------------------------------------------------------------------------------------------------------------------------------------------------------------------------|----------------|---------------------------------------------------------------------------------------------------------------------------------------------------------------------------------------------------------------------------------------------------------------------------------------------------------------------------------------------------------------------------------------------------------------------------------------------------------------------------------------------------------------------------------|---|
| Ng et al PDI 2003(33)      | Prevalent, stable diabetic and non-diabetic CAPD patients at a single Chinese center | 60 (30 diabetic, 30 age-, sex-, dialysis duration-matched non-diabetic) | Prospective observational cohort study                     | Prevalence of PAD on the basis of ABI (<1.0, severe <0.7 or >1.3) or questionnaire screening administered by trained nurses<br><br>Development of lower limb vascular complications | 1 year         | Prevalence of abnormal ABI: 37% (50% in diabetics)(severe 20%)<br><br>Prevalence of intermittent claudication symptoms: 10%<br><br>Abnormal ABI predicted by older age and diabetes mellitus<br><br>Abnormal ABI independently predicted lower limb vascular complications (OR 21.0, 95% CI, 2.35-187, p=0.00064); severe (OR 27.4, 95% CI, 2.81-275, p=0.0045)                                                                                                                                                                 | C |
| Martin et al PDI 1996 (34) | Prevalent CAPD patients at a single center                                           | 52                                                                      | Retrospective, cross-sectional, observational cohort study | Medical records search for symptoms, arteriography and Doppler studies to determine PAD prevalence                                                                                  | Not applicable | Prevalence of PAD: 29% (80% in diabetics)                                                                                                                                                                                                                                                                                                                                                                                                                                                                                       | C |
| Liu et al PDI 2009 (35)    | Prevalent CAPD patients stable $\geq 3$ months at a single Taiwanese center in 2005  | 153                                                                     | Prospective, longitudinal observational cohort study       | Prevalence of PAD<br><br>Predictors of PAD<br><br>Patient survival<br><br>Technique survival                                                                                        | 30 months      | Prevalence of PAD: 20% (33% in diabetics) (33% of PAD symptomatic)<br><br>PAD associated with older age, diabetes mellitus, pre-existing cardiovascular disease, lower total Kt/V, lower renal Kt/V, lower total and renal creatinine clearance, lower serum albumin, higher serum triglyceride<br><br>30 month survival lower in PAD vs non-PAD (33.3% vs 77.0%, p<0.001) (HR 0.024, 95% CI, 0.873-0.975)<br><br>30 month technique survival lower in PAD vs non-PAD (33.3% vs 77.0%, p<0.001) (HR 0.920, 95% CI, 0.868-0.972) | B |

|                                                      |                                                                                                                                                                        |                            |                                                           |                                                                                   |        |                                                                                                                                                                                    |   |
|------------------------------------------------------|------------------------------------------------------------------------------------------------------------------------------------------------------------------------|----------------------------|-----------------------------------------------------------|-----------------------------------------------------------------------------------|--------|------------------------------------------------------------------------------------------------------------------------------------------------------------------------------------|---|
| Kuang et al<br>Vasc Health<br>Risk Manag<br>2012(36) | Point-prevalent PD patients >60 years old on PD >3 months with no heart failure, recent (within 1 month) peritonitis or atrial fibrillation at a single Chinese center | 69                         | Retrospective, cross-sectional observational cohort study | Prevalence of PAD<br>Predictors of PAD                                            | -      | Prevalence of PAD: 32% (47% in diabetics) (41% symptomatic)<br><br>PAD independently predicted by lower serum albumin and lower residual Kt/V                                      | C |
| Lee et al<br>BMC<br>Nephrol<br>2012(37)              | Point-prevalent ESRD patients on either PD or HD at a single Taiwanese center in 2007                                                                                  | 484 (104 on PD)            | Retrospective, cross-sectional observational cohort study | Prevalence of PAD<br>Predictors of PAD                                            | -      | Prevalence of PAD: 4.8% in PD, 21.8% in HD<br><br>PAD independently predicted by older age and diabetes mellitus                                                                   | C |
| Tian et al<br>Blood Purif<br>30:50-5,<br>2010(38)    | Period-prevalent CAPD population at a single Chinese center 2008-2009 (on PD >3 months)                                                                                | 343                        | Prospective observational cohort study                    | Prevalence of PAD<br>Predictors of PAD                                            | -      | Prevalence of PAD: 27% (45% >70 yo) (71% in diabetics)<br><br>PAD independently predicted by diabetes, diastolic blood pressure, extracellular/intracellular water ratio and lnCRP | C |
| Liu et al<br>Nephrology<br>2011(39)                  | Period-prevalent CAPD population with residual GFR >1 mL/min/1.73m <sup>2</sup> at a single Chinese center in 2005 (on PD >3 months)                                   | 74                         | Prospective longitudinal observational cohort study       | Residual renal function decline                                                   | 1 year | Higher ABI independently predicted a slower rate of residual renal function decline (OR per 0.01 unit increase in ABI, 0.896, 95% CI 0.840-0.955)                                  | C |
| An et al Int<br>Urol<br>Nephrol<br>2010(25)          | Stages 3-5 CKD, HD or PD patients at a single Korean center                                                                                                            | 102 (20 PD, 58 HD, 24 CKD) | Prospective, cross-sectional observational                | Vascular calcification (length of calcification of dorsalis pedis artery on plain | -      | Prevalence of clinical PAD: 20% (all diabetics)<br><br>Prevalence of vascular calcification: 50% (45% Score 1, 55% Score 2)                                                        | C |

|                                              |                                                                                                                                       |                                                 |                                               |                                                                                                  |   |                                                                                                                                                                                                                                                                                                             |   |
|----------------------------------------------|---------------------------------------------------------------------------------------------------------------------------------------|-------------------------------------------------|-----------------------------------------------|--------------------------------------------------------------------------------------------------|---|-------------------------------------------------------------------------------------------------------------------------------------------------------------------------------------------------------------------------------------------------------------------------------------------------------------|---|
|                                              |                                                                                                                                       |                                                 | cohort study                                  | radiograph)<br>Color Doppler ultrasonography (>30% occlusion femoral or popliteal artery)<br>ABI |   | Prevalence of >30% occlusion femoral or popliteal artery: 40% (10% if no vascular calcification, 70% if vascular calcification)<br><br>ABI not discriminatory between those with or without vascular calcification or clinical PAD                                                                          |   |
| Huang et al<br>Ren Fail<br>2007(27)          | 146 ESRD patients on PD ≥4 months at a single Taiwanese center                                                                        | 146                                             | Cross-sectional observational cohort study    | ABI<br>TBI                                                                                       | - | Prevalence of ABI <0.9: 6%<br><br>Prevalence of TBI <0.6: 5%<br><br>ABI correlated with TBI (p<0.001, r=0.335)                                                                                                                                                                                              | C |
| Leskinen et al<br>Am J Kidney Dis<br>2002(7) | 136 CKD patients (59 pre-dialysis, 36 dialysis, 41 renal transplant) and 59 controls (orthopedic patients) at a single Finnish center | 136 (36 dialysis – PD proportion not specified) | Prospective, non-randomized, controlled study | ABI<br>TBI<br><br>Claudication questionnaire (WHO/Rose)                                          |   | Prevalence of intermittent claudication: 7% (3% in dialysis patients) (33% patients with claudication did not have PAD)<br><br>ABI ≤0.9: 31% in dialysis patients<br><br>TBI ≤0.6: 19% in dialysis patients<br><br>PAD (low ABI or TBI): 31% in dialysis patients<br><br>ABI ≥1.3: 42% in dialysis patients | B |

CAPD = continuous ambulatory peritoneal dialysis; PAD = peripheral arterial disease; ABI = ankle brachial index; CI = confidence interval; HR = hazard ratio; OR = odds ratio;  
PD = peritoneal dialysis; ESRD = end stage renal disease; HD = hemodialysis; CKD = chronic kidney disease; TBI = toe brachial index

## B. Treatment – General measures

In the general population, the ACC/AHA guidelines (18) and TASC II guidelines (19) each variously recommend that individuals with PAD should receive multidisciplinary medical therapy to reduce pain, minimize cardiovascular risk and avoid limb loss, including smoking cessation, antiplatelet therapy (aspirin and/or clopidogrel), lipid lowering therapy, cilostazol and supervised exercise therapy. In the presence of critical lower limb ischemia, revascularization with either angioplasty or surgical bypass is the preferred treatment option. Although high level evidence for these interventions is lacking in CKD patients (particularly those receiving dialysis), the NKF-KDOQI guidelines recommend that CKD patients with PAD should be treated in the same manner as the general population (15). However, the KDIGO CKD Guidelines (17) and the KDIGO Cardiovascular update (16) acknowledge that evidence-based therapies for PAD are lacking in patients with CKD. This section aims to review the available evidence in CKD patients, with a particular emphasis on PD patients.

**Guideline 3.4.4: We suggest peritoneal dialysis patients with non-critical peripheral arterial disease receive supervised exercise therapy. (2C)**

### Rationale

Exercise therapy has been found in general PAD patient populations with intermittent claudication to have equivalent effectiveness to percutaneous luminal angioplasty in a meta-analysis of 8 randomized controlled trials (RCTs)(40) and to produce significantly improved walking time, pain-free walking distance and maximum walking distance (but not mortality, amputation, peak exercise calf blood flow or ABI) compared with usual care or placebo in a meta-analysis of 22 trials involving 1200 participants (41). There are no RCTs to test the efficacy of exercise therapy in CKD patients with PAD. However, given the overall benefits of exercise in CKD patients, the working group felt that a recommendation statement, albeit weak, should be drawn on prescribing supervised exercise therapy in PD patients with non-critical PAD.

**Guideline 3.4.5: We suggest peritoneal dialysis patients with peripheral arterial disease be considered for antiplatelet therapy. (2D)**

### Rationale

Although antiplatelet therapy has been shown to be beneficial in reducing the risks of cardiovascular events in patients with PAD in the general population (42), its effects in CKD patients remain uncertain due to the significant contribution of calcific arteriosclerosis as well as atherosclerosis to PAD and because of the heightened bleeding risks in this population. Indeed, a recent systematic review and meta-analysis (43, 44) of adult patients with CKD found that in individuals with acute coronary syndromes or requiring percutaneous coronary interventions, antiplatelet therapy had little or no effect on myocardial infarction, stroke, cardiovascular mortality or all-cause mortality, but was associated with an increased risk of minor bleeding and an uncertain risk of major bleeding [Evidence Review Table 1]. For CKD

patients with stable or no cardiovascular disease, antiplatelet therapy was associated with a reduction in myocardial infarction, and increased risk of minor bleeding and uncertain effects on stroke, all-cause mortality, cardiovascular mortality and major bleeding [Evidence Review Table 1]. The results of this systematic review were significantly limited by the variable definitions used for minor and major bleeding and by the fact that they were derived from post hoc analyses of trials of broader populations and are mostly hypothesis-generating. In addition, none of these studies examined the use of anti-platelet therapy as a treatment of PAD in PD patients. The NKF-KDOQI guidelines (15) recommend CKD patients with PAD should be treated with antiplatelet agents, as in the general population. However, the KDIGO Cardiovascular update (16) emphasizes that evidence is lacking and that bleeding risks may be increased. Given the current lack of RCTs and a high degree of uncertainty regarding the risk versus benefit associated with the use of antiplatelet therapy in PD patients with PAD, the workgroup felt that any recommendation on the use of anti-platelet therapy in PD patients with PAD is very weak and that patients be informed of the lack of clear efficacy on cardiovascular morbidity and mortality and a potentially increased risk of bleeding before prescribing anti-platelet therapy.

**Guideline 3.4.6: We suggest peritoneal dialysis patients with peripheral arterial disease, particularly those with diabetes mellitus, receive multidisciplinary foot care involving regular foot examination, treatment by a podiatrist/chiropract and education about home foot care (including use of hydrating lotions and appropriate foot wear). (2C)**

### **Rationale**

Diabetes is a major predictor of PAD in PD patients and the majority of diabetic PD patients have PAD (38) [Screening Section Evidence Review Table 1]. Five low quality studies of diabetic CKD patients (including 3 studies exclusively in dialysis patients) have reported reductions in amputations following institution of multidisciplinary preventive foot care programs [Evidence Review Table 2]. In the quasi-randomized controlled study by McMurray et al, use of an intensive diabetes care education and management program in the dialysis unit was associated with a statistically lower hospitalization rate for diabetes and peripheral vascular- and infection-related admissions (45). The Australian Evidence-Based Guideline on Prevention, Identification and Management of Foot Complications in Diabetes (46) recommends that “podiatry review is an important component of a foot protection program” in patients with diabetes mellitus based on evidence that such prevention strategies improved life expectancy and quality-adjusted life years reduced foot ulcer rates and amputations, and were cost-effective in intermediate and high risk feet (47). The KDIGO CKD Guidelines recommend that “adults with CKD and diabetes are offered regular podiatric assessment (2A)” (17). Given the high prevalence of PAD and subclinical PAD in diabetic PD patients, the high rates of adverse clinical outcomes in such patients and the evidence supporting regular podiatry review in the general diabetes population, the workgroup felt that a weak recommendation should be given for regular podiatry assessment for PD patients with diabetes.

## Other Potential Therapies

### *Smoking cessation*

There are no RCTs of smoking cessation in patients with PAD, either with or without CKD. A number of non-randomized studies in general PAD patient populations have variously reported associations between smoking cessation and improvements in ankle pressures, walking distance, exercise tolerance, rest pain, cardiovascular events and mortality (48-50) [Evidence Review Table 3]. Given the strong association between smoking and PAD and that smoking cessation has been shown to be also associated with other significant health benefits, the working group felt that a strong level of recommendation should be given for smoking cessation in PD patients with PAD despite the lack of RCTs to test the efficacy of smoking cessation on PAD in PD patients.

### *Cholesterol lowering*

There have been no RCTs to date which have evaluated the safety and efficacy of lipid-lowering therapies specifically in the treatment of PAD in CKD patients. In the Studies of Heart And Renal Protection (SHARP) trial (51) [Evidence Review Table 4], approximately 5% of participants were receiving PD and 15% had previous PAD [Evidence Review Table 1]. This trial demonstrated a significant benefit of ezetimibe 10 mg/simvastatin 20 mg daily on the primary composite endpoint of major atherosclerotic events compared with matching placebo (relative risk [RR], 0.83, 95% confidence intervals [CI], 0.74 - 0.94,  $p=0.002$ ). Although sub-group analysis of patients undergoing PD at enrolment showed no significant effect of lipid-lowering (RR, 0.70, 95% CI 0.46-1.08), notably, this study was not adequately powered for detecting a significant difference in the subgroup of PD patients. In secondary analyses, the intervention group experienced a significant reduction in non-coronary revascularization procedures (RR, 0.79, 95% CI, 0.68 - 0.93). The other 2 major trials of lipid-lowering treatments, Die Deutsche Diabetes Dialyse Studie (4D) (52) and A Study to Evaluate the Use of Rosuvastatin in Subjects on Regular Hemodialysis: An Assessment of Survival and Cardiovascular Events (AURORA) (53), involved hemodialysis patients and did not demonstrate a significant benefit of statin therapy on the primary composite cardiovascular end-point [Evidence Review Table 2]. The prevalence of prior PAD was not specified in the AURORA study, but was cited as 45.7% in the intervention arm of the 4D trial (which was comprised solely of diabetic hemodialysis patients).

A subsequent systematic review of RCTs of lipid-lowering therapy in CKD patients between 2000–2011 by Upadhyay et al (54) found that lipid lowering significantly reduced the risks of all-cause mortality, cardiovascular events and myocardial infarction. However, a more comprehensive systematic review of RCTs comparing statins with placebo, no treatment or another statin in adults with CKD from the inception of Cochrane and EMBASE databases until February 2012 found that the benefits of therapy on all-cause mortality, cardiovascular mortality, cardiovascular events and myocardial infarction was restricted to CKD patients not on dialysis, and were not evident in CKD patients receiving dialysis (55) (Evidence Review Table 2). On the basis of these findings, the KDIGO Clinical Practice Guideline for Lipid

Management in CKD, which has recently been released suggests that statins or statin/ezetimibe not be initiated in adults with CKD stage 5D (2A). The guidelines also suggest that, in patients already receiving statins or statin/ezetimibe combination at the time of dialysis initiation, these agents should be continued (2C). No recommendations are made for patients with established cardiovascular disease, including PAD. On the other hand, the NKF-KDOQI Guidelines (15) recommend lipid-lowering therapy in CKD patients with PAD. Putting together the current available evidence on the efficacy of statins on cardiovascular outcomes and lack of RCTs examining specifically the efficacy of statins on PAD related outcomes, the workgroup felt that recommendation on the use of either statin or statin/ezetimibe as a standard treatment for PAD in PD patients is very weak.

### ***Cilostazol***

Cilostazol is a selective inhibitor of phosphodiesterase 3, which has vasodilatory and antiplatelet actions. It has been shown in the general PAD population to be associated with significant improvement in maximum and pain-free walking distances (56). The TASC II guidelines (19) recommend that cilostazol should be used as the first-line pharmacotherapy agent in patients with intermittent claudication. Pharmacokinetic studies in patients with mild, moderate and severe renal impairment suggest that dosage reduction is not required in CKD (57). Very few studies have examined the efficacy of cilostazol in dialysis patients with PAD and none of them were prospective RCTs [Evidence Review Table 5]. The workgroup felt that it is premature to make recommendations regarding the use of this class of drug in PD patients with PAD. In addition, caution should be exercised in patients with congestive heart failure of any grade or severity.

### ***Naftidofuryl oxalate***

Naftidofuryl oxalate is a vasodilatory agent that has also been shown in the general PAD population to be associated with significant improvement in maximum and pain-free walking distances (56). As with cilostazol, the pharmacokinetic profile of oral naftidofuryl oxalate does not appear to be significantly influenced by renal impairment, even in patients with creatinine clearances <20 mL/min (58). There are so far no studies evaluating the safety and efficacy of naftidofuryl oxalate in CKD patients with PAD. The work group felt that it may be premature to make any recommendations regarding the use of this drug in treating PD patients with PAD. We felt that this should form the scope of future research in PD patients with PAD.

### ***Revascularization***

Revascularization (percutaneous transluminal angioplasty ± stenting or surgical bypass) is not infrequently employed as a limb-sparing procedure in patients with critical limb ischemia. There are currently no RCTs evaluating the relative benefits and safety of angioplasty versus surgical bypass or of the timing of revascularization versus early amputation. Percutaneous angioplasty has been promoted for patients with proximal lesions and limited distal disease. Most studies have demonstrated appreciably poorer outcomes of revascularization in PAD patients with ESRD compared with those with normal kidney function, with higher rates of wound

infection, gangrene, prolonged hospitalization, peri-procedure sepsis, amputation and mortality (23). Limited evidence suggests that patients undergoing primary amputation have poorer survival than those undergoing primary revascularization (59) and that patients receiving angioplasty have worse outcomes than those receiving surgical bypass, although these results are likely confounded by indication [Evidence Review Tables 6 & 7]. The optimal management of PD patients with critical limb ischemia therefore remains unclear. We suggest that primary angioplasty, primary surgical revascularization or primary amputation are all reasonable therapeutic options for the treatment of critical limb ischemia in PD patients, depending on individual circumstances, and that the preferred management strategy remains unclear based on current available evidence (2C).



**Evidence Review Table 1.** Studies that examined antiplatelet therapy in relation to peripheral arterial disease outcomes of dialysis patients.

| Reference                              | Population                                                                                                                                                                                                                                                                                             | Patient number                                                                                                                                                                                | Study design                        | Outcomes of interest                                                                                                | Follow-up duration (if applicable) | Results                                                                                                                                                                                                                                                                                                                                                                                                                                                                                                                                                                                                                                                                                                                                                                                                                                                                                                                                                                                                                                                                                                                                                                                                                                                                                                                                                                                                                                                                                                                                                                                                                                                                                                                                                                                                                                                                                                                                                            | Study quality |
|----------------------------------------|--------------------------------------------------------------------------------------------------------------------------------------------------------------------------------------------------------------------------------------------------------------------------------------------------------|-----------------------------------------------------------------------------------------------------------------------------------------------------------------------------------------------|-------------------------------------|---------------------------------------------------------------------------------------------------------------------|------------------------------------|--------------------------------------------------------------------------------------------------------------------------------------------------------------------------------------------------------------------------------------------------------------------------------------------------------------------------------------------------------------------------------------------------------------------------------------------------------------------------------------------------------------------------------------------------------------------------------------------------------------------------------------------------------------------------------------------------------------------------------------------------------------------------------------------------------------------------------------------------------------------------------------------------------------------------------------------------------------------------------------------------------------------------------------------------------------------------------------------------------------------------------------------------------------------------------------------------------------------------------------------------------------------------------------------------------------------------------------------------------------------------------------------------------------------------------------------------------------------------------------------------------------------------------------------------------------------------------------------------------------------------------------------------------------------------------------------------------------------------------------------------------------------------------------------------------------------------------------------------------------------------------------------------------------------------------------------------------------------|---------------|
| Palmer et al Ann Int Med 2012 (43, 44) | Systematic review of RCTs comparing antiplatelet treatment with placebo or no treatment in adults with CKD who had either acute coronary syndromes or were undergoing revascularization or had stable or no cardiovascular disease from inception of Cochrane and EMBASE databases until November 2011 | 9 RCTs involving 9969 participants with acute coronary syndromes or undergoing percutaneous coronary intervention; 31 RCTs involving 11,701 patients with stable or no cardiovascular disease | Systematic review and meta-analysis | All-cause mortality<br>Cardiovascular mortality<br>Myocardial infarction<br>Bleeding<br>(PAD outcomes not assessed) | Not applicable                     | <p>No effect on myocardial infarction in CKD patients with acute coronary syndrome or undergoing percutaneous coronary intervention (7 RCTs, 5261 participants; RR 0.89, 95% CI 0.75-1.05) but reduction in CKD patients with stable or no cardiovascular disease (10 RCTs, 9133 participants; RR 0.66, 95% CI 0.51-0.87)</p> <p>Uncertain effect on stroke in CKD patients with acute coronary syndrome or undergoing percutaneous coronary intervention (1 RCT, 411 participants; RR 0.51, 95% CI 0.09-2.77) and in CKD patients with stable or no cardiovascular disease (10 RCTs, 9133 participants; RR 0.66, 95% CI 0.16-2.78)</p> <p>No effect on all-cause mortality in CKD patients with acute coronary syndrome or undergoing percutaneous coronary intervention (8 RCTs, 9347 participants; RR 0.89, 95% CI 0.75-1.05) and uncertain effect in CKD patients with stable or no cardiovascular disease (21 RCTs, 10632 participants; RR 0.87, 95% CI 0.61-1.24)</p> <p>Uncertain effects on cardiovascular mortality in CKD patients with acute coronary syndrome or undergoing percutaneous coronary intervention (2 RCTs, 4498 participants; RR 0.96, 95% CI 0.79-1.16) and in CKD patients with stable or no cardiovascular disease (16 RCTs, 8706 participants; RR 0.91, 95% CI 0.60-1.36)</p> <p>Increased risk of major bleeding in CKD patients with acute coronary syndrome or undergoing percutaneous coronary intervention (9 RCTs, 9863 participants; RR 1.40, 95% CI 1.07-1.86) and uncertain effects in CKD patients with stable or no cardiovascular disease (18 RCTs, 10230 participants; RR 1.29, 95% CI 0.69-2.42)</p> <p>Increased risk of minor bleeding in CKD patients with acute coronary syndrome or undergoing percutaneous coronary intervention (9 RCTs, 9863 participants; RR 1.47, 95% CI 1.25-1.72) and in CKD patients with stable or no cardiovascular disease (18 RCTs, 10230 participants; RR 1.70, 95% CI 1.44-2.02)</p> | A             |

RCTs = randomized controlled trials; CKD = chronic kidney disease; RR = relative risk; CI = confidence interval

**Evidence Review Table 2.** Studies that examined preventive foot care in relation to peripheral arterial disease outcomes of dialysis patients.

| Reference                                              | Population                                                                                                                   | Patient number | Study design                                                                                                                                                                             | Outcomes of interest                                              | Follow-up duration (if applicable) | Results                                                                                                                                                                                                                 | Study quality |
|--------------------------------------------------------|------------------------------------------------------------------------------------------------------------------------------|----------------|------------------------------------------------------------------------------------------------------------------------------------------------------------------------------------------|-------------------------------------------------------------------|------------------------------------|-------------------------------------------------------------------------------------------------------------------------------------------------------------------------------------------------------------------------|---------------|
| Lipscombe et al<br>Perit Dial Int<br>(60)              | PD patients with diabetes mellitus enrolled in the PD program at a Canadian centre between January 1997 and December 1999    | 132            | Retrospective chart review                                                                                                                                                               | Time to first amputation or death                                 | Not specified                      | Being seen by a chiropodist was protective against first amputation or death (adjusted HR 0.39, 95% CI 0.05-0.73)                                                                                                       | C             |
| McMurray et al<br>Am J Kidney Dis<br>2002 (45)         | PD or HD patients with diabetes mellitus managed at a single centre in the United States                                     | 83 (13 PD)     | Quasi-RCT (allocated according to dialysis day schedule) of intensive education and care management (including regular foot checks and care) versus usual care                           | Foot risk category<br><br>Amputations                             | 1 year                             | Foot risk score unchanged in study group (2.2 to 2.0) but worsened in control group (2.7 to 3.3, p<0.05)<br><br>Amputations significantly lower in the study group (13% vs 0%, p<0.05)                                  | C             |
| Griffiths et al<br>Surg Gynecol<br>Obstet 1992<br>(61) | Diabetic patients attending a foot clinic with foot ulcers at a single centre in the United States since 1985                | 171            | Retrospective observational cohort study comparing patients who developed ulcers during clinic attendance (Group 1, n=21) with those who were referred with foot ulcers (Group 2, n=150) | Number of lesions<br><br>Mean healing time<br><br>Amputation rate | Not specified                      | Lower number of lesions in Group 1 (1.52±0.98 vs 2.06±1.33, p<0.05)<br><br>Shorter mean healing time in Group 1 (111.9±80.5 days vs 160.5±151.3 days, p<0.05)<br><br>Fewer major or partial foot amputations in Group 1 | C             |
| Foster et al<br>Diabet Med<br>1995 (62)                | Diabetic patients attending a special foot clinic compared with historical controls at a single centre in the United Kingdom | 50             | Prospective, pre- and post-intervention study                                                                                                                                            | Gangrene<br><br>Major amputations                                 | Not specified                      | Lower number of patients with gangrene or major amputations compared with historical controls                                                                                                                           | C             |

|                                        |                                                                     |    |                                                                                                                                                                   |                                                                         |           |                                                                                                                  |   |
|----------------------------------------|---------------------------------------------------------------------|----|-------------------------------------------------------------------------------------------------------------------------------------------------------------------|-------------------------------------------------------------------------|-----------|------------------------------------------------------------------------------------------------------------------|---|
| Prentice et al<br>CANNT J 2009<br>(63) | HD patients with foot ulcers<br>from 3 Canadian HD units in<br>2005 | 57 | Prospective, longitudinal observational cohort<br>study following implementation of Association<br>of Ontario Diabetic Foot Management Best<br>Practice Guideline | Number of<br>wounds<br><br>Grade of<br>wounds<br><br>New<br>amputations | 15 months | Significant reductions in<br>number (p<0.05) and grade<br>(p<0.01) of wounds over time.<br><br>5 new amputations | C |
|----------------------------------------|---------------------------------------------------------------------|----|-------------------------------------------------------------------------------------------------------------------------------------------------------------------|-------------------------------------------------------------------------|-----------|------------------------------------------------------------------------------------------------------------------|---|

PD = peritoneal dialysis; HD = hemodialysis; RCT = randomized controlled trial; HR = hazard ratio; CI = confidence interval

**Evidence Review Table 3.** Studies that examined smoking in relation to peripheral arterial disease outcomes of dialysis patients.

| Reference                  | Population                                                                                                                                                               | Patient<br>number     | Study design                       | Outcomes of<br>interest                             | Follow-up<br>duration (if<br>applicable) | Results                                                                                                                                                   | Study<br>quality |
|----------------------------|--------------------------------------------------------------------------------------------------------------------------------------------------------------------------|-----------------------|------------------------------------|-----------------------------------------------------|------------------------------------------|-----------------------------------------------------------------------------------------------------------------------------------------------------------|------------------|
| Foley et al KI<br>2003(64) | Patients initiating dialysis in 1996-1997 in<br>USRDS Dialysis Morbidity and Mortality Wave 2<br>(all patients initiating PD and one-fifth of<br>patients initiating HD) | 4024<br>(48.8%<br>PD) | Prospective<br>inception<br>cohort | New-onset<br>cardiovascular<br>events,<br><br>Death | Mean 2.2 years                           | Active smoking (but not former smoking)<br>status associated with an increased risk of<br>new-onset PAD (adjusted HR, 1.68, 95% CI<br>1.27-2.22, p<0.001) | C                |

PD = peritoneal dialysis; HD = hemodialysis; USRDS = United States Renal Data System; HR = hazard ratio; CI = confidence interval; PAD = peripheral arterial disease

**Evidence Review Table 4.** Studies that examined lipid-lowering therapy in relation to peripheral arterial disease outcomes of dialysis patients.

| Reference                      | Population                                                                                             | Patient number                                            | Study design                                                                                                                   | Outcomes of interest                                                                                                                                                                               | Follow-up duration (if applicable) | Results                                                                                                                                                                                                                                                                                                                                                                                                                                                                                                                                                                                                                                            | Study quality |
|--------------------------------|--------------------------------------------------------------------------------------------------------|-----------------------------------------------------------|--------------------------------------------------------------------------------------------------------------------------------|----------------------------------------------------------------------------------------------------------------------------------------------------------------------------------------------------|------------------------------------|----------------------------------------------------------------------------------------------------------------------------------------------------------------------------------------------------------------------------------------------------------------------------------------------------------------------------------------------------------------------------------------------------------------------------------------------------------------------------------------------------------------------------------------------------------------------------------------------------------------------------------------------------|---------------|
| Baigent et al Lancet 2011 (51) | Patients ≥40 years old with CKD (>1 prior serum creatinine ≥150 μmol/L in men or ≥130 μmol/L in women) | 4650 (496 or 5% on PD at enrollment; 1393 or 15% had PAD) | Multi-centre, multi-country, prospective, double-blind, parallel-arm RCT of simvastatin/ezetimibe 20/10 mg vs matching placebo | Primary composite end-point was time to first major atherosclerotic event (non-fatal myocardial infarction or coronary death, non-hemorrhagic stroke, or any arterial revascularization procedure) | 4.9 years                          | <p>17% reduction in major atherosclerotic events (RR, 0.83, 95% CI 0.74-0.94, p=0.002)</p> <p>No significant effect on non-fatal myocardial infarction or death from coronary artery disease (RR, 0.92, 95% CI 0.76-1.11, p=0.37)</p> <p>Significant reduction in non-hemorrhagic stroke (RR, 0.75, 95% CI 0.60-0.94, p=0.01)</p> <p>Significant reduction in arterial revascularization procedures (RR, 0.79, 95% CI 0.68-0.93, p=0.0036).</p> <p>Sub-group analysis of primary end-point in PD patients showed no significant effect of lipid-lowering (RR, 0.70, 95% CI 0.46-1.08) but the study was not powered for this subgroup analysis</p> | A             |
| Wanner et al NEJM 2005 (52)    | Patients 18-80 years old with type 2 diabetes mellitus on HD < 2years at 178 centers in Germany        | 1255                                                      | Multi-centre, prospective, double-blind, parallel-arm RCT of atorvastatin 20 mg od vs matching placebo                         | Composite primary endpoint of death from cardiac causes, nonfatal myocardial infarction and stroke                                                                                                 | 4 years                            | <p>No significant effect of atorvastatin on primary endpoint (RR, 0.92, 95% CI, 0.77-1.10, p=0.37) versus placebo.</p> <p>No significant effect of atorvastatin on individual components of primary endpoint, except an increased risk of fatal stroke (RR, 2.03, 95% CI, 1.05-3.93, p=0.04) was observed versus placebo.</p> <p>Significant reduction of all cardiac events (RR, 0.82, 95% CI, 0.68-0.99, p=0.03) in</p>                                                                                                                                                                                                                          | A             |

|                                      |                                                                                                                                                                                                                               |                                            |                                                                                                                       |                                                                                                             |                |                                                                                                                                                                                                                                                                                                                                                                                                                                                                                                                                                                                                                                                                                                                                             |   |
|--------------------------------------|-------------------------------------------------------------------------------------------------------------------------------------------------------------------------------------------------------------------------------|--------------------------------------------|-----------------------------------------------------------------------------------------------------------------------|-------------------------------------------------------------------------------------------------------------|----------------|---------------------------------------------------------------------------------------------------------------------------------------------------------------------------------------------------------------------------------------------------------------------------------------------------------------------------------------------------------------------------------------------------------------------------------------------------------------------------------------------------------------------------------------------------------------------------------------------------------------------------------------------------------------------------------------------------------------------------------------------|---|
|                                      |                                                                                                                                                                                                                               |                                            |                                                                                                                       |                                                                                                             |                | atorvastatin group versus placebo.<br><br>No effect on cerebrovascular events (RR, 1.12, 95% CI, 0.81-1.55, p=0.49)<br><br>No effect on mortality (RR, 0.93, 95% CI, 0.79-1.08, p=0.33)                                                                                                                                                                                                                                                                                                                                                                                                                                                                                                                                                     |   |
| Fellstrom et al NEJM 2009 (53)       | Men and women 50-80 years old with ESRD treated with hemodialysis or hemofiltration for $\geq 3$ months at 280 centers in 25 countries                                                                                        | 2776                                       | Multi-centre, multi-country, prospective, double-blind, parallel-arm RCT of rosuvastatin 10 mg od vs matching placebo | Composite primary endpoint of death from cardiac causes, nonfatal myocardial infarction and nonfatal stroke | 3.8 years      | No significant effect on primary endpoint (HR, 0.96, 95% CI 0.84-1.11) or on any individual components of this endpoint<br><br>No significant effect on all-cause mortality (HR 0.96, 95% CI 0.86-1.07)                                                                                                                                                                                                                                                                                                                                                                                                                                                                                                                                     | A |
| Upadhyay et al Ann Int Med 2012 (54) | Systematic review of RCTs comparing $\geq 1$ lipid-lowering agents or lifestyle modification strategies with other lipid-lowering treatments, placebo or no treatment in CKD patients from January 2000 through November 2011 | 18 RCTs (5 CKD, 13 CKD sub-group analyses) | Systematic review and meta-analysis                                                                                   | All-cause mortality<br><br>Cardiovascular events<br><br>Myocardial infarction<br><br>Renal outcomes         | Not applicable | Lipid lowering reduced all-cause mortality (15 RCTs; RR 0.91, 95% CI 0.83-0.99; p=0.031), although significant heterogeneity ( $I^2=59\%$ ; p=0.003)<br><br>No effect on cardiovascular mortality (4 RCTs; RR 0.96, 95% CI 0.87-1.06, p=0.41)<br><br>Reduced cardiovascular events (9 RCTs; RR 0.78, 95% CI 0.71-0.86, p<0.001).<br><br>Reduction of myocardial infarction (9 RCTs; RR 0.74, 95% CI 0.67-0.81, p<0.001)<br><br>No effect on ischemic and hemorrhagic stroke (9 RCTs; RR 0.90, 95% CI 0.63-1.27, p=0.55).<br><br>No effect on prevention of ESRD (3 RCTs; RR 0.97, 95% CI 0.90-1.05, p=0.49)<br><br>No effect on composite of ESRD, $\geq 25\%$ decrease in eGFR or doubling serum creatinine (7 RCTs; RR 0.91, 95% CI 0.78- | A |

|                                             |                                                                                                                                                                                 |                                                                                                                                                  |                                     |                                                                                            |                |                                                                                                                                                                                                                                                                                                                                                                                                                                                                                                                                                                                                                                                                          |   |
|---------------------------------------------|---------------------------------------------------------------------------------------------------------------------------------------------------------------------------------|--------------------------------------------------------------------------------------------------------------------------------------------------|-------------------------------------|--------------------------------------------------------------------------------------------|----------------|--------------------------------------------------------------------------------------------------------------------------------------------------------------------------------------------------------------------------------------------------------------------------------------------------------------------------------------------------------------------------------------------------------------------------------------------------------------------------------------------------------------------------------------------------------------------------------------------------------------------------------------------------------------------------|---|
|                                             |                                                                                                                                                                                 |                                                                                                                                                  |                                     |                                                                                            |                | 1.06, p=0.21)<br>No evidence of increased risk of adverse events                                                                                                                                                                                                                                                                                                                                                                                                                                                                                                                                                                                                         |   |
| Palmer et al<br>Ann Int<br>Med 2012<br>(55) | Systematic review of RCTs comparing statins with placebo, no treatment or another statin in adults with CKD from inception of Cochrane and EMBASE databases until February 2012 | 80 RCTs comprising 51,099 participants (39820 CKD patients not on dialysis; 7982 patients receiving dialysis; 3297 kidney transplant recipients) | Systematic review and meta-analysis | All-cause mortality<br>Cardiovascular mortality<br>Cardiovascular events<br>Adverse events | Not applicable | Statins reduced all-cause mortality in non-dialysis CKD patients (RR 0.81, 95% CI 0.74-0.88) but not dialysis patients (RR 0.96, 95% CI 0.88-1.04)<br><br>Reduced cardiovascular mortality in non-dialysis CKD patients (RR 0.78, 95% CI 0.68-0.89) but not dialysis patients (RR 0.94, 95% CI 0.82-1.07)<br><br>Reduced cardiovascular events in non-dialysis CKD patients (RR 0.76, 95% CI 0.73-0.80) but not dialysis patients (RR 0.95, 95% CI 0.87-1.03)<br><br>Reduced myocardial infarction in non-dialysis CKD patients (RR 0.55, 95% CI 0.42-0.72) but not dialysis patients (RR 0.87, 95% CI 0.71-1.07)<br><br>No evidence of increased risk of adverse events | A |

CKD = chronic kidney disease; PAD = peripheral arterial disease; RCTs = randomized controlled trials; RR = relative risk; CI = confidence interval; ESRD = end stage renal disease; eGFR = estimated glomerular filtration rate

**Evidence Review Table 5.** Studies that examined cilostazol in relation to peripheral arterial disease outcomes of dialysis patients.

| Reference                                   | Population                                                                                                                                       | Patient number                                                                                                                     | Study design                                 | Outcomes of interest                                                                                                                         | Follow-up duration (if applicable) | Results                                                                                                                                                                                                     | Study quality |
|---------------------------------------------|--------------------------------------------------------------------------------------------------------------------------------------------------|------------------------------------------------------------------------------------------------------------------------------------|----------------------------------------------|----------------------------------------------------------------------------------------------------------------------------------------------|------------------------------------|-------------------------------------------------------------------------------------------------------------------------------------------------------------------------------------------------------------|---------------|
| Shiohira et al Clin Exp Nephrol 2011 (65)   | HD patients with PAD and restless legs syndrome at a single Japanese center                                                                      | 45 HD patients receiving cilostazol and 22 controls                                                                                | Prospective, non-randomized controlled study | PAD score on self-administered questionnaire                                                                                                 | 12 months                          | No significant change in PAD score on multivariable analysis                                                                                                                                                | C             |
| Ishii et al Clin Ther 2010 (66)             | HD patients who underwent successful percutaneous transluminal angioplasty for femoropopliteal disease at a single Japanese center               | 358 consecutive lesions in 174 HD patients (cilostazol 100 mg bd 121 lesions in 61 patients; controls 237 lesions in 113 patients) | Retrospective chart review (non-randomized)  | Cumulative patency, as measured by event-free rate 6 years after PTA (event = restenosis >50% of vessel diameter in femoropopliteal lesions) | ≤6 years                           | Cilostazol use associated with Higher 6-year cumulative patency (59.5% vs 50.6%, p=0.005), revascularization-free survival (65.6% vs 50.4%, p=0.013) and amputation-free survival (88.5% vs 79.6%, p=0.047) | C             |
| Ishii et al Clin J Am Soc Nephrol 2008 (67) | HD patients who underwent successful percutaneous transluminal angioplasty for iliac and/or femora-popliteal disease at a single Japanese center | 372 consecutive lesions in 193 HD patients (cilostazol 100 mg bd 130 lesions in 71 patients; controls 242 lesions in 122 patients) | Retrospective chart review (non-randomized)  | 5-yr patency rate (angiographic luminal diameter >50%)                                                                                       | 5 years                            | Higher 5-yr patency rate in cilostazol group (52.4% vs 32.9%, p=0.0005).<br>Cilostazol independent predictor of preventing restenosis (HR 0.50, 95% CI 0.26-0.87, p=0.014)                                  | C             |

HD = hemodialysis; PAD = peripheral arterial disease; PTA = percutaneous transluminal angioplasty; HR = hazard ratio; CI = confidence interval

**Evidence Review Table 6.** Studies that examined angioplasty in relation to peripheral arterial disease outcomes of dialysis patients.

| Reference                                        | Population                                                                                                                | Patient number                                                           | Study design                             | Outcomes of interest                                                    | Follow-up duration (if applicable) | Results                                                                                                                                                                                                | Study quality |
|--------------------------------------------------|---------------------------------------------------------------------------------------------------------------------------|--------------------------------------------------------------------------|------------------------------------------|-------------------------------------------------------------------------|------------------------------------|--------------------------------------------------------------------------------------------------------------------------------------------------------------------------------------------------------|---------------|
| Graziani et al Nephrol Dial Transplant 2007 (68) | HD patients with critical limb ischemia treated by percutaneous transluminal angioplasty                                  | 107 patients with 132 ischaemic limbs                                    | Prospective observational cohort study   | Cumulative limb salvage rate                                            | 22 months                          | Cumulative limb salvage rate 86% at 1 year, 84% at 2 years, 84% at 3 years and 62% at 4 years                                                                                                          | C             |
| Nishibe et al Int Angiol 2009 (69)               | Dialysis patients with PAD and superficial femoral artery lesions treated by angioplasty and stent deployment             | 18 dialysis patient limbs (25 control limbs)                             | Retrospective observational cohort study | Primary patency<br>Primary assisted patency<br>Limb salvage<br>Survival | 25 +/-15 months (range, 1.0–78.2)  | Comparable outcomes between the dialysis and non-dialysis patients                                                                                                                                     | C             |
| Kumada et al Nephrol Dial Transplant 2008 (70)   | HD and non-HD patients who underwent successful angioplasty for PAD at a single Japanese center                           | 118 HD patients with 205 lesions vs 108 non-HD patients with 143 lesions | Prospective, non-randomized study        | 5-yesr primary patency, limb salvage and survival                       | 32±21 months                       | HD patients experienced significantly worse 5-yr patency (57.7% vs 68%, p=0.015), limb salvage (85% vs 97%, p=0.007) and survival (61.5% vs 84.2%, p=0.01).                                            | C             |
| Abularrage et al J Vasc Surg 2010 (71)           | 920 patients undergoing percutaneous luminal angioplasty with or without stenting at a single centre in the United States | 920 patients undergoing 1075 procedures                                  | Retrospective observational cohort study | Primary patency<br>Limb salvage<br>Survival                             | 34 months                          | Dialysis was an independent predictor of lower 5-yr primary patency (HR 1.59, 95% CI 1.10-2.33, p=0.02), limb loss (HR 2.94, 95% CI 1.39-5.00, p=0.003) and death (HR 4.24, 95% CI 2.80-6.45, p<0.001) | C             |

HD = hemodialysis; HR = hazard ratio; CI = confidence interval



**Evidence Review Table 7.** Studies that examined surgical revascularization in relation to peripheral arterial disease outcomes of dialysis patients.

| Reference                                              | Population                                                                                                                                                                     | Patient number                                                                                       | Study design                             | Outcomes of interest                                                                                                                     | Follow-up duration (if applicable) | Results                                                                                                                                                                                                                                                                                                                     | Study quality |
|--------------------------------------------------------|--------------------------------------------------------------------------------------------------------------------------------------------------------------------------------|------------------------------------------------------------------------------------------------------|------------------------------------------|------------------------------------------------------------------------------------------------------------------------------------------|------------------------------------|-----------------------------------------------------------------------------------------------------------------------------------------------------------------------------------------------------------------------------------------------------------------------------------------------------------------------------|---------------|
| Kimura et al<br>Eur J<br>Endovasc<br>Surg 2003<br>(72) | ESRD patients with critical limb ischemia                                                                                                                                      | 28 limbs in 22 ESRD patients vs 65 limbs in 57 controls                                              | Retrospective observational cohort study | Perioperative mortality<br><br>Patient survival<br><br>2-year primary patency<br><br>2-year secondary patency<br><br>2-year limb salvage | 21 (range 0–65) months             | Higher peri-operative mortality in ESRD (18% vs 0%, p=0.001)<br><br>Lower patient survival (45% vs 85%, p<0.001)<br><br>2-year outcomes in ESRD patients vs controls were not significantly different for primary patency (76% vs 83%, p=0.12), secondary patency (85% vs 91%, p=0.06) or limb salvage (83% vs 93%, p=0.06) | C             |
| Whittemore et al J Vasc Surg 1993 (59)                 | All patients with CKD (serum creatinine >2 mg/dl) who required surgical intervention for ischemic lower limbs during a 15 year period at a single center in the United Kingdom | 56 patients who underwent 70 bypass procedures vs 31 patients who underwent primary major amputation | Retrospective observational cohort study | Survival                                                                                                                                 | Not specified                      | Patients undergoing primary amputation experienced significantly lower 5-year survival than those undergoing primary bypass (9% vs 40%, p<0.004)                                                                                                                                                                            | C             |
| Johnson et al J Vasc Surg 1995 (73)                    | ESRD patients who underwent surgical revascularization at a single center in the United States                                                                                 | 69 reconstructions in 53 ESRD patients (including 6 PD patients)                                     | Retrospective chart review               | 30 day operative mortality<br><br>2-year survival<br><br>2-year primary                                                                  | Not specified                      | 30-day operative mortality 10%<br><br>2-year survival 38%<br><br>2-year primary graft patency 68%                                                                                                                                                                                                                           | C             |

|                                    |                                                                                                                       |                                            |                                          |                                                                                                                         |               |                                                                                                                                                                                                                                                                                                                      |   |
|------------------------------------|-----------------------------------------------------------------------------------------------------------------------|--------------------------------------------|------------------------------------------|-------------------------------------------------------------------------------------------------------------------------|---------------|----------------------------------------------------------------------------------------------------------------------------------------------------------------------------------------------------------------------------------------------------------------------------------------------------------------------|---|
|                                    |                                                                                                                       |                                            |                                          | graft patency                                                                                                           |               |                                                                                                                                                                                                                                                                                                                      |   |
| Leers et al J Vasc Surg 1998 (74)  | ESRD patients undergoing pedal bypass grafting at a single center in the United States                                | 41 bypasses in 34 ESRD patients            | Retrospective observational cohort study | Primary patency<br>Limb salvage<br>Survival                                                                             | 13.5 months   | Primary patency 62% at 1 year and 62% at 2 years<br>Limb salvage 56% at 1 year and 50% at 2 years<br>Survival 64% at 1 year and 52% at 2 years                                                                                                                                                                       | C |
| Lantis et al J Vasc Surg 2001 (75) | ESRD patients receiving infrainguinal bypass graft operations at a single center in the United Kingdom 1993-1999      | 60 ESRD patients (4 on PD vs 481 controls) | Retrospective observational cohort study | Perioperative mortality<br>Survival<br>Primary patency<br>Assisted primary patency<br>Secondary patency<br>Limb salvage | Not specified | ESRD patients had comparable outcomes vs controls with respect to peri-operative mortality (1.3% vs 2.3%), 4-year survival (51% vs 63%), primary patency (60% vs 64%), assisted primary patency (86% vs 77%) and secondary patency (86% vs 78%) but had significantly lower limb salvage rates (77% vs 92%, p<0.02). | C |
| Ramdev et al J Vasc Surg 2002 (76) | Dialysis patients receiving lower extremity bypass for limb salvage at a single center in the United States 1990-1999 | 146 (5 on PD)                              | Retrospective observational cohort study | In-hospital mortality<br>Peri-operative CCF<br>Peri-operative AMI<br>Peri-operative arrhythmia<br>Peri-operative wound  | Not specified | In-hospital mortality 5%<br>Peri-operative CCF 2%<br>Peri-operative AMI 3%<br>Peri-operative arrhythmia 5%<br>Peri-operative wound infection 10%<br>Survival 60% at 1 year, 18% at 3year, 5% at 5 year<br>Primary patency 84% at 1 year, 64% at 2 years                                                              | C |

|                                        |                                                                                                                                    |                                                                  |                                                                                                             |                                                                               |               |                                                                                                                                                                                        |   |
|----------------------------------------|------------------------------------------------------------------------------------------------------------------------------------|------------------------------------------------------------------|-------------------------------------------------------------------------------------------------------------|-------------------------------------------------------------------------------|---------------|----------------------------------------------------------------------------------------------------------------------------------------------------------------------------------------|---|
|                                        |                                                                                                                                    |                                                                  |                                                                                                             | infection<br>Survival<br>Primary patency<br>Secondary patency<br>Limb salvage |               | Secondary patency 85% at 1 year, 68% at 3 year<br>Limb salvage 80% at 1 year, 80% at 3 year                                                                                            |   |
| Reddan et al Am J Kidney Dis 2001 (77) | ESRD patients and matched controls undergoing surgical revascularization for PAD at a single center in the United States 1992-1996 | 20 ESRD patients (31 procedures) and 57 controls (64 procedures) | Retrospective case-control analysis (matched for age, race, gender, diabetes mellitus and hospital setting) | Survival<br>Time to 50% limb loss<br>Time to 50% graft patency loss           | Not specified | ESRD patients had inferior median survival (1.72 vs 5.17 years, p<0.001), time to 50% limb loss (1.24 vs 5.65 years, p<0.001) and time to 50% graft patency (0.7 vs 5.5 years, p<0.05) | C |

ESRD = end stage renal disease; CKD = chronic kidney disease; PD = peritoneal dialysis; PAD = peripheral arterial disease; CCF = congestive cardiac failure; AMI = acute myocardial infarction

## References

1. O'Hare A, Johansen K. Lower-extremity peripheral arterial disease among patients with end-stage renal disease. *J Am Soc Nephrol.* 2001; 12:2838-2847.
2. Cheung AK, Sarnak MJ, Yan G, Dwyer JT, Heyka RJ, Rocco MV, et al. Atherosclerotic cardiovascular disease risks in chronic hemodialysis patients. *Kidney Int.* 2000; 58:353-362.
3. Bommer J, Strohbeck E, Goerich J, Bahner M, Zuna I. Arteriosclerosis in dialysis patients. *Int J Artif.Organs.* 1996; 19:638-644.
4. Goodman WG, Goldin J, Kuizon BD, Yoon C, Gales B, Sider D, et al. Coronary-artery calcification in young adults with end-stage renal disease who are undergoing dialysis. *N.Engl.J Med.* 2000; 342:1478-1483.
5. Nishizawa Y, Shoji T, Kawagishi T, Morii H. Atherosclerosis in uremia: Possible roles of hyperparathyroidism and intermediate density lipoprotein accumulation. *Kidney Int Suppl.* 1997; 62:S90-S92.
6. Goldsmith DJ, Covic A, Sambrook PA, Ackrill P. Vascular calcification in long-term haemodialysis patients in a single unit: A retrospective analysis. *Nephron.* 1997; 77:37-43.
7. Leskinen Y, Salenius JP, Lehtimäki T, Huhtala H, Saha H. The prevalence of peripheral arterial disease and medial arterial calcification in patients with chronic renal failure: Requirements for diagnostics. *Am J Kidney Dis.* 2002; 40:472-479.
8. Webb AT, Franks PJ, Reaveley DA, Greenhalgh RM, Brown EA. Prevalence of intermittent claudication and risk factors for its development in patients on renal replacement therapy. *Eur.J Vasc.Surg.* 1993; 7:523-527.
9. Kasiske BL, Guijarro C, Massy ZA, Wiederkehr MR, Ma JZ. Cardiovascular disease after renal transplantation. *J Am Soc Nephrol.* 1996; 7:158-165.
10. Morrissey PE, Shaffer D, Monaco AP, Conway P, Madras PN. Peripheral vascular disease after kidney-pancreas transplantation in diabetic patients with end-stage renal disease. *Arch.Surg.* 1997; 132:358-361.
11. Rostand SG, Drueke TB. Parathyroid hormone, vitamin d, and cardiovascular disease in chronic renal failure. *Kidney Int.* 1999; 56:383-392.
12. Savage T, Clarke AL, Giles M, Tomson CR, Raine AE. Calcified plaque is common in the carotid and femoral arteries of dialysis patients without clinical vascular disease. *Nephrol Dial Transplant.* 1998; 13:2004-2012.
13. Eggers PW, Gohdes D, Pugh J. Nontraumatic lower extremity amputations in the medicare end-stage renal disease population. *Kidney Int.* 1999; 56:1524-1533.
14. Dossa CD, Shepard AD, Amos AM, Kupin WL, Reddy DJ, Elliott JP, et al. Results of lower extremity amputations in patients with end-stage renal disease. *J Vasc.Surg.* 1994; 20:14-19.
15. K/DOQI clinical practice guidelines for cardiovascular disease in dialysis patients. *Am J Kidney Dis.* 2005; 45:S1-153.
16. Herzog CA, Asinger RW, Berger AK, Charytan DM, Diez J, Hart RG, et al. Cardiovascular disease in chronic kidney disease. A clinical update from kidney disease: Improving global outcomes (KDIGO). *Kidney Int.* 2011; 80:572-586.
17. KDIGO 2012 clinical practice guideline for the evaluation and management of chronic kidney disease: Chapter 4: Other complications of CKD: CVD, medication dosage, patient safety, infections, hospitalizations, and caveats for investigating complications of CKD. *Kidney Int.* 2013; 83:91-111.
18. Hirsch AT, Haskal ZJ, Hertzner NR, Bakal CW, Creager MA, Halperin JL, et al. ACC/AHA 2005 practice guidelines for the management of patients with peripheral arterial disease (lower extremity, renal, mesenteric, and abdominal aortic): A collaborative report from the

american association for vascular surgery/society for vascular surgery, society for cardiovascular angiography and interventions, society for vascular medicine and biology, society of interventional radiology, and the acc/aha task force on practice guidelines (writing committee to develop guidelines for the management of patients with peripheral arterial disease): Endorsed by the american association of cardiovascular and pulmonary rehabilitation; national heart, lung, and blood institute; society for vascular nursing; transatlantic inter-society consensus; and vascular disease foundation. *Circulation*. 2006; 113:e463-e654.

19. Norgren L, Hiatt WR, Dormandy JA, Nehler MR, Harris KA, Fowkes FG, et al. Inter-society consensus for the management of peripheral arterial disease (tasc ii). *Eur.J Vasc.Endovasc.Surg*. 2007; 33 Suppl 1:S1-75.
20. United States Preventive Services Taskforce Force USPST. Screening for peripheral arterial disease: Recommendation statement. Ahrq publication no. 05-0583-a-ef. Rockville, MD: Agency for Healthcare Research and Quality; <http://www.uspreventiveservicestaskforce.org/uspstf05/pad/padrs.htm>, viewed 21 February 2013; 2005.
21. Feigelson HS, Criqui MH, Fronck A, Langer RD, Molgaard CA. Screening for peripheral arterial disease: The sensitivity, specificity, and predictive value of noninvasive tests in a defined population. *Am J Epidemiol*. 1994; 140:526-534.
22. Fowkes FG. Epidemiology of atherosclerotic arterial disease in the lower limbs. *Eur.J Vasc.Surg*. 1988; 2:283-291.
23. Garimella PS, Hart PD, O'Hare A, DeLoach S, Herzog CA, Hirsch AT. Peripheral artery disease and ckd: A focus on peripheral artery disease as a critical component of ckd care. *Am J Kidney Dis*. 2012; 60:641-654.
24. Saha HH, Leskinen YK, Salenius JP, Lahtela JT. Peripheral vascular disease in diabetic peritoneal dialysis patients. *Perit Dial Int*. 2007; 27 Suppl 2:S210-S214.
25. An WS, Son YK, Kim SE, Kim KH, Yoon SK, Bae HR, et al. Vascular calcification score on plain radiographs of the feet as a predictor of peripheral arterial disease in patients with chronic kidney disease. *Int Urol.Nephrol*. 2010; 42:773-780.
26. Young MJ, Adams JE, Anderson GF, Boulton AJ, Cavanagh PR. Medial arterial calcification in the feet of diabetic patients and matched non-diabetic control subjects. *Diabetologia*. 1993; 36:615-621.
27. Huang WH, Chen YC, Hung CC, Huang JY, Lin JL, Yang CW. Atherosclerotic risk factors among ankle-brachial index and toe-brachial index in peritoneal dialysis patients. *Ren Fail*. 2007; 29:835-841.
28. Franklin ML. Transcutaneous measurement of partial pressure of oxygen and carbon dioxide. *Respir.Care Clin.N.Am*. 1995; 1:119-131.
29. Carter SA, Tate RB. Value of toe pulse waves in addition to systolic pressures in the assessment of the severity of peripheral arterial disease and critical limb ischemia. *J Vasc.Surg*. 1996; 24:258-265.
30. Tian SL, Tian XK, Han QF, Wang T. Peripheral arterial disease predicts overall and cardiovascular mortality in peritoneal dialysis patients. *Ren Fail*. 2012; 34:1010-1014.
31. Tian SL, Tian XK, Han QF, Axelsson J, Wang T. Presence of peripheral arterial disease predicts loss of residual renal function in incident capd patients. *Perit Dial Int*. 2012; 32:67-72.
32. Webb AT, Brown EA. Prevalence of symptomatic arterial disease and risk factors for its development in patients on continuous ambulatory peritoneal dialysis. *Perit Dial Int*. 1993; 13 Suppl 2:S406-S408.

33. Ng SY, Cheng SW, Chu WL, Lui SL, Lo WK. Screening by trained nurses for peripheral vascular disease in continuous ambulatory peritoneal dialysis patients with and without diabetes. *Perit Dial Int.* 2003; 23 Suppl 2:S134-S138.
34. Martin C, Montes R, Guerrero A, Lopez R, Cabello V, Bernal G. Peripheral vascular disease in capd. *Perit Dial Int.* 1996; 16:529-531.
35. Liu JH, Lin HH, Yang YF, Liu YL, Kuo HL, Wang IK, et al. Subclinical peripheral artery disease in patients undergoing peritoneal dialysis: Risk factors and outcome. *Perit Dial Int.* 2009; 29:64-71.
36. Kuang DW, Li CL, Kuok UI, Cheung K, Lio WI, Xin J. Prevalence and risk factors associated with peripheral artery disease in elderly patients undergoing peritoneal dialysis. *Vasc. Health Risk Manag.* 2012; 8:581-586.
37. Lee CC, Wu CJ, Chou LH, Shen SM, Chiang SF, Jen PC, et al. Peripheral artery disease in peritoneal dialysis and hemodialysis patients: Single-center retrospective study in taiwan. *BMC Nephrol.* 2012; 13:100.
38. Tian SL, Murphy M, Han QF, Lu XH, Wang T. Prevalence and risk factors for peripheral artery disease among patients on maintenance peritoneal dialysis. *Blood Purif.* 2010; 30:50-55.
39. Liu JH, Wang SM, Chen CC, Hsieh CL, Lin SY, Chou CY, et al. Relation of ankle-brachial index to the rate of decline of residual renal function in peritoneal dialysis patients. *Nephrology (Carlton).* 2011; 16:187-93.
40. Frans FA, Bipat S, Reekers JA, Legemate DA, Koelemay MJ. Systematic review of exercise training or percutaneous transluminal angioplasty for intermittent claudication. *Br.J Surg.* 2012; 99:16-28.
41. Watson L, Ellis B, Leng GC. Exercise for intermittent claudication. *Cochrane Database Syst Rev.* 2008:CD000990.
42. Collaborative meta-analysis of randomised trials of antiplatelet therapy for prevention of death, myocardial infarction, and stroke in high risk patients. *BMJ.* 2002; 324:71-86.
43. Palmer SC, Di Micco L, Razavian M, Craig JC, Perkovic V, Pellegrini F, et al. Effects of antiplatelet therapy on mortality and cardiovascular and bleeding outcomes in persons with chronic kidney disease: A systematic review and meta-analysis. *Ann Intern Med.* 2012; 156:445-459.
44. Palmer SC, Di Micco L, Razavian M, Craig JC, Perkovic V, Pellegrini F, et al. Antiplatelet agents for chronic kidney disease. *Cochrane Database Syst Rev.* 2013; 2:CD008834.
45. McMurray SD, Johnson G, Davis S, McDougall K. Diabetes education and care management significantly improve patient outcomes in the dialysis unit. *Am J Kidney Dis.* 2002; 40:566-575.
46. National Health and Medical Research Council NHMRC. National evidence-based guideline on prevention, identification and management of foot complications in diabetes. Melbourne: Baker Heart and Diabetes Institute; 2011.
47. Chow I, Lemos EV, Einarson TR. Management and prevention of diabetic foot ulcers and infections: A health economic review. *Pharmacoeconomics.* 2008; 26:1019-1035.
48. Girolami B, Bernardi E, Prins MH, ten Cate JW, Hettiarachchi R, Prandoni P, et al. Treatment of intermittent claudication with physical training, smoking cessation, pentoxifylline, or nafronyl: A meta-analysis. *Arch. Intern Med.* 1999; 159:337-345.
49. Jonason T, Bergstrom R. Cessation of smoking in patients with intermittent claudication. Effects on the risk of peripheral vascular complications, myocardial infarction and mortality. *Acta Med Scand.* 1987; 221:253-260.
50. Quick CR, Cotton LT. The measured effect of stopping smoking on intermittent claudication. *Br.J Surg.* 1982; 69 Suppl:S24-S26.

51. Baigent C, Landray MJ, Reith C, Emberson J, Wheeler DC, Tomson C, et al. The effects of lowering ldl cholesterol with simvastatin plus ezetimibe in patients with chronic kidney disease (study of heart and renal protection): A randomised placebo-controlled trial. *Lancet*. 2011; 377:2181-2192.
52. Wanner C, Krane V, Marz W, Olschewski M, Mann JF, Ruf G, et al. Atorvastatin in patients with type 2 diabetes mellitus undergoing hemodialysis. *N.Engl.J Med*. 2005; 353:238-248.
53. Fellstrom BC, Jardine AG, Schmieder RE, Holdaas H, Bannister K, Beutler J, et al. Rosuvastatin and cardiovascular events in patients undergoing hemodialysis. *New England Journal of Medicine*. 2009; 360:1395-1407.
54. Upadhyay A, Earley A, Lamont JL, Haynes S, Wanner C, Balk EM. Lipid-lowering therapy in persons with chronic kidney disease: A systematic review and meta-analysis. *Ann Intern Med*. 2012; 157:251-262.
55. Palmer SC, Craig JC, Navaneethan SD, Tonelli M, Pellegrini F, Strippoli GF. Benefits and harms of statin therapy for persons with chronic kidney disease: A systematic review and meta-analysis. *Ann Intern Med*. 2012; 157:263-275.
56. Stevens JW, Simpson E, Harnan S, Squires H, Meng Y, Thomas S, et al. Systematic review of the efficacy of cilostazol, naftidrofuryl oxalate and pentoxifylline for the treatment of intermittent claudication. *Br.J Surg*. 2012; 99:1630-1638.
57. Mallikaarjun S, Forbes WP, Bramer SL. Effect of renal impairment on the pharmacokinetics of cilostazol and its metabolites. *Clin.Pharmacokinet*. 1999; 37 Suppl 2:33-40.
58. Legallicier B, Barbier S, Bolloni L, Fillastre JP, Godin M, Kuhn T, et al. Pharmacokinetics of naftidrofuryl in patients with renal impairment. *Arzneimittelforschung*. 2005; 55:370-375.
59. Whittemore AD, Donaldson MC, Mannick JA. Infrainguinal reconstruction for patients with chronic renal insufficiency. *J Vasc.Surg*. 1993; 17:32-39.
60. Lipscombe J, Jassal SV, Bailey S, Bargman JM, Vas S, Oreopoulos DG. Chiropody may prevent amputations in diabetic patients on peritoneal dialysis. *Perit Dial Int*. 2003; 23:255-259.
61. Griffiths GD, Wieman TJ. Meticulous attention to foot care improves the prognosis in diabetic ulceration of the foot. *Surg.Gynecol.Obstet*. 1992; 174:49-51.
62. Foster AV, Snowden S, Grenfell A, Watkins PJ, Edmonds ME. Reduction of gangrene and amputations in diabetic renal transplant patients: The role of a special foot clinic. *Diabet.Med*. 1995; 12:632-635.
63. Prentice D, Ritchie L, Crandall J, Harwood L, McAuslan D, Lawrence-Murphy JA, et al. Implementation of a diabetic foot management best practice guideline (bpg) in hemodialysis units. *CANNT.J*. 2009; 19:20-24.
64. Foley RN, Herzog CA, Collins AJ. Smoking and cardiovascular outcomes in dialysis patients: The united states renal data system wave 2 study. *Kidney Int*. 2003; 63:1462-1467.
65. Shiohira S, Yoshida T, Sugiura H, Yoshida S, Mitobe M, Shimada K, et al. Effect of the antiplatelet agent cilostazol on endovascular inflammatory biochemical parameters and the clinical symptoms of peripheral artery disease and restless legs syndrome in hemodialysis patients. *Clin.Exp.Nephrol*. 2011; 15:893-899.
66. Ishii H, Kumada Y, Toriyama T, Aoyama T, Takahashi H, Tanaka M, et al. Effects of oral cilostazol 100 mg bid on long-term patency after percutaneous transluminal angioplasty in patients with femoropopliteal disease undergoing hemodialysis: A retrospective chart review in japanese patients. *Clin.Ther*. 2010; 32:24-33.
67. Ishii H, Kumada Y, Toriyama T, Aoyama T, Takahashi H, Yamada S, et al. Cilostazol improves long-term patency after percutaneous transluminal angioplasty in hemodialysis patients with peripheral artery disease. *Clin.J Am Soc Nephrol*. 2008; 3:1034-1040.

68. Graziani L, Silvestro A, Bertone V, Manara E, Alicandri A, Parrinello G, et al. Percutaneous transluminal angioplasty is feasible and effective in patients on chronic dialysis with severe peripheral artery disease. *Nephrol Dial Transplant*. 2007; 22:1144-1149.
69. Nishibe T, Kondo Y, Dardik A, Muto A, Koizumi J, Nishibe M. Stent placement in the superficial femoral artery for patients on chronic hemodialysis with peripheral artery disease. *Int Angiol*. 2009; 28:484-489.
70. Kumada Y, Aoyama T, Ishii H, Tanaka M, Kawamura Y, Takahashi H, et al. Long-term outcome of percutaneous transluminal angioplasty in chronic haemodialysis patients with peripheral arterial disease. *Nephrol Dial Transplant*. 2008; 23:3996-4001.
71. Abularrage CJ, Conrad MF, Hackney LA, Paruchuri V, Crawford RS, Kwolek CJ, et al. Long-term outcomes of diabetic patients undergoing endovascular infrainguinal interventions. *J Vasc.Surg*. 2010; 52:314-322.
72. Kimura H, Miyata T, Sato O, Furuya T, Iyori K, Shigematsu H. Infrainguinal arterial reconstruction for limb salvage in patients with end-stage renal disease. *Eur.J Vasc.Endovasc.Surg*. 2003; 25:29-34.
73. Johnson BL, Glickman MH, Bandyk DF, Esses GE. Failure of foot salvage in patients with end-stage renal disease after surgical revascularization. *J Vasc.Surg*. 1995; 22:280-285.
74. Leers SA, Reifsnnyder T, Delmonte R, Caron M. Realistic expectations for pedal bypass grafts in patients with end-stage renal disease. *J Vasc.Surg*. 1998; 28:976-980.
75. Lantis JC, Conte MS, Belkin M, Whittemore AD, Mannick JA, Donaldson MC. Infrainguinal bypass grafting in patients with end-stage renal disease: Improving outcomes? *J Vasc.Surg*. 2001; 33:1171-1178.
76. Ramdev P, Rayan SS, Sheahan M, Hamdan AD, Logerfo FW, Akbari CM, et al. A decade experience with infrainguinal revascularization in a dialysis-dependent patient population. *J Vasc.Surg*. 2002; 36:969-974.
77. Reddan DN, Marcus RJ, Owen WF, Jr., Szczech LA, Landwehr DM. Long-term outcomes of revascularization for peripheral vascular disease in end-stage renal disease patients. *Am J Kidney Dis*. 2001; 38:57-63.



## SECTION 5. ARRHYTHMIA

**Guideline 3.5.1: We recommend all peritoneal dialysis patients undergo a 12-lead electrocardiography at initiation of dialysis and then repeat at least annually to screen for any abnormal electrical activity of the heart including atrial fibrillation. (1C)**

### Rationale

In the general population, the prevalence of atrial fibrillation (AF) is estimated to be approximately 1% (1). Currently, the prevalence of AF in chronic kidney disease (CKD) patients is only available in dialysis patients. On the basis of the diagnostic categories of AF reported in the United States Renal Data System (USRDS), a prevalence of 13% in patients on hemodialysis (HD) and 7% in patients undergoing peritoneal dialysis (PD) was described. Holter monitoring longitudinal studies of patients on HD showed AF in 13 to 27% of the patients (2-5). AF is highly correlated with coronary artery disease (CAD), valvular disease (particularly due to valve calcifications), myocardial fibrosis and left ventricular hypertrophy (LVH)(5-8). Because of the strong relationship of AF to structural heart disease, it is difficult to determine whether patients have complications related to AF or to advanced structural heart disease accompanied by AF. Fluctuating levels of electrolytes during HD, as well as sympathetic nervous system activation and modulation of the renin-angiotensin system represent additional predisposing factors for AF in dialysis patients (4-8-10).

The risk of hospitalization due to AF increases linearly with the decrease in glomerular filtration rate, and it is 3.1-fold in those on dialysis compared to patients with normal renal function. The 3-year mortality rates for dialysis patients who had been hospitalized for AF were also significantly higher (53%); compared to control subjects (45%). Moreover, a longitudinal, single-center study (n = 190) reported 4-year mortality rates of 81% in dialysis patients with AF compared with 29% in those without (11). Therefore, regardless of whether AF is an independent risk factor for mortality or represents a risk predictor, we recommend that AF should be regularly screened for in all PD patients, because it indicates a markedly increased risk for comorbidities and death.

The main complication of AF is ischemic stroke. In a Japanese community-based observational study of 1,977 individuals not on dialysis (12), the hazard rate ratios for stroke in the subgroup with an estimated glomerular filtration rate between 40 and 70 ml/min was 1.9, and with <40 mL/min was 3.1 compared with those with an estimated glomerular filtration rate >70 mL/min. In the VALIANT trial that included patients with acute myocardial infarction and signs of heart failure but not on dialysis, there was a significant stepwise increase in stroke rates from 2 to 6% after 3 years with decreasing estimated glomerular filtration rate from ≥75 to <45 mL/min (13). The stroke incidence was 15% in HD patients compared with 9% in patients who had CKD and were not on HD and 2% in matched patients without. After occurrence of a stroke or transient ischemic attack, the 2-year mortality rates are dramatically increased in patients with CKD compared with those without. In a recent study, HD and PD patients had higher incidences of hospitalized ischemic stroke (102.6 and 100.1/10,000 person-years) and hemorrhagic stroke (74.7 and 59.4/10,000 person-years) in comparison to the age- and sex-matched reference cohort (42.4 and 13.0/10,000 person-years, respectively). In general, from the USRDS, there was no difference in the rates of stroke (in the presence of atrial fibrillation) between patients on HD or PD (1). However, a recent study using the HD group as the comparison group, peritoneal PD patients had a lower risk of hemorrhagic stroke (Hazard Ratio, 0.75; 95% CI, 0.58-0.96), and there was no

significant adjusted difference in risks of ischemic stroke between PD and HD patients. With regard to AF, one single-center analysis of HD patients observed thromboembolic event rates of 24% per year in those with AF compared with 5% in those with sinus rhythm, a 4.6-fold increased relative risk (11). In the USRDS (1), dialysis patients with AF had a 1.6-fold higher rate of stroke than those without AF. This was based exclusively on a 1.8-fold higher rate of ischemic strokes, whereas hemorrhagic stroke rates were similar.

**Evidence Review Table 1.** Studies supporting the screening for atrial fibrillation in dialysis patients

| Reference                               | Population         | Patient number | Study design              | Outcomes of interest                                            | Follow-up duration (if applicable) | Results                                                                                             | Study quality |
|-----------------------------------------|--------------------|----------------|---------------------------|-----------------------------------------------------------------|------------------------------------|-----------------------------------------------------------------------------------------------------|---------------|
| Vazquez E, et al. Am Heart J. 2000 (3)  | HD patients        | 190 patients   | Observational             | Prevalence of atrial fibrillation                               | 1 year                             | In 13.6% of patients, atrial fibrillation was found; age was associated with arrhythmia (P = 0.003) | B             |
| Abbott KC, et al. BMC Nephrol. 2003 (6) | HD and PD patients | 3374 patients  | Prospective, cohort study | Incidence and risk factors for hospitalized atrial fibrillation | N/A                                | Patients had a high incidence of atrial fibrillation.                                               | B             |

HD = hemodialysis; PD = peritoneal dialysis; N/A = not available

## References

1. 2014 AHA/ACC/HRS Guideline for the Management of Patients With Atrial Fibrillation: A Report of the American College of Cardiology/American Heart Association Task Force on Practice Guidelines and the Heart Rhythm Society. January CT, Wann LS, Alpert JS, Calkins H, Cleveland JC Jr, Cigarroa JE, Conti JB, Ellinor PT, Ezekowitz MD, Field ME, Murray KT, Sacco RL, Stevenson WG, Tchou PJ, Tracy CM, Yancy CW. *J Am Coll Cardiol* 2014 Mar 28.
2. Vazquez E, Sanchez-Perales C, Borrego F, Garcia-Cortes MJ, Lozano C, Guzman M, Gil JM, Borrego MJ, Perez V. Influence of atrial fibrillation on the morbid-mortality of patients on hemodialysis. *Am Heart J* 2000; 140:886– 90.
3. Bozbas H, Atar I, Yildirim A, Ozgul A, Uyar M, Ozdemir N, Muderrisoglu H, Ozin B. Prevalence and predictors of arrhythmia in end stage renal disease patients on hemodialysis. *Ren Fail* 2007; 29:331– 9.
4. Genovesi S, Pogliani D, Faini A, Valsecchi MG, Riva A, Stefani F, Acquistapace I, Stella A, Bonforte G, DeVecchi A, DeCristofaro V, Buccianti G, Vincenti A. Prevalence of atrial fibrillation and associated factors in a population of long-term hemodialysis patients. *Am J Kidney Dis* 2005; 46:897– 902.
5. Abbott KC, Trespalacios FC, Taylor AJ, Agodoa LY. Atrial fibrillation in chronic dialysis patients in the United States: Risk factors for hospitalization and mortality. *BMC Nephrol* 2003; 4 :1– 10.
6. K/DOQI Workgroup: K/DOQI clinical practice guidelines for cardiovascular disease in dialysis patients. *Am J Kidney Dis* 2005; 45[ Suppl 3]: S1– S153,
7. Hausberg M, Grassi G. Mechanisms of sympathetic overactivity in patients with chronic renal failure: A role for chemoreflex activation? *J Hypertens* 2007; 25:47– 9.
8. Vazquez E, Sanchez-Perales C, Lozano C, Garcia-Cortes MJ, Borrego F, Guzman M, Perez P, Pagola C, Borrego MJ, Perez V. Comparison of prognostic value of atrial fibrillation versus sinus rhythm in patients on long-term hemodialysis. *Am J Cardiol* 2003; 92:868– 71.
9. Nakayama M, Metoki H, Terawaki H, Ohkubo T, Kikuya M, Sato T, Nakayama K, Asayama K, Inoue R, Hashimoto J, Totsune K, Hoshi H, Ito S, Imai Y. Kidney dysfunction as a risk factor for first symptomatic stroke events in a general Japanese population-the Ohasama study. *Nephrol Dial Transplant* 2007; 22:1910– 5.
10. Falgá C, Capdevila JA, Soler S, Rabuñal R, Sánchez Muñoz-Torrero JF, Gallego P, Monreal M. Clinical outcome of patients with venous thromboembolism and renal insufficiency: Findings from the RIETE registry. *Thromb Haemost* 2007; 98:771– 6.
11. Vazquez E, Sanchez-Perales C, Garcia-Cortes MJ, Borrego F, Lozano C, Guzman M, Gil JM, Liebana A, Perez P, Borrego MJ, Perez V. Ought dialysis patients with atrial fibrillation be treated with oral anticoagulants? *Int J Cardiol* 2003; 87:135– 9.
12. Anavekar NS, McMurray JJ, Velazquez EJ, Solomon SD, Kober L, Rouleau JL, White HD, Nordlander R, Maggioni A, Dickstein K, Zelenkofske S, Leimberger JD, Califf RM, Pfeffer MA. Relation between renal dysfunction and cardiovascular outcomes after myocardial infarction. *N Engl J Med* 2004; 351:1285– 95.
13. Wiesholzer M, Harm F, Tomasec G, Barbieri G, Putz D, Balcke P. Incidence of stroke among chronic hemodialysis patients with nonrheumatic atrial fibrillation. *Am J Nephrol* 2001; 21:35– 9.

## SECTION 6. SUDDEN CARDIAC DEATH

**Guideline 3.6.1: We suggest peritoneal dialysis patients with low ejection fraction, high troponin and N-terminal pro-brain natriuretic peptide levels and those who survive a previous tachyarrhythmic cardiac arrest be considered at high risk for sudden cardiac death. (2C)**

### Rationale

Sudden cardiac death (SCD) is common in peritoneal dialysis (PD) patients. Within the limitations of the current definition in diagnosing SCD and difficulty in verifying death as sudden cardiac death, SCD is still the most common cause of cardiovascular death, accounting for around 25% of all deaths (1). Drawing on recommendations relating to identifying high-risk patients and therapeutic approaches in preventing SCD remain extremely challenging in PD patients, due to lack of a good understanding of the underlying etiology and lack of clinical trials that examined SCD as a primary endpoint (2). The published literature relating to chronic kidney disease (CKD) patients is very limited in general, and almost non-existent in PD patients. The situation is further handicapped by the lack of a universally applied definition of sudden cardiac death, lack of information on the type of arrhythmia and circumstances preceding SCD and a complete deficiency of randomized clinical trials (RCTs) that examined the efficacy of various therapeutic strategies in relation to SCD in this population. The lack of recurrent circulatory stress, dialysis induced cardiac ischemia (3), electrolytic shifts (4) and acute change in volume status suggest knowledge in relation to SCD in hemodialysis patients (HD) may not be applicable to PD patients.

Studies predicting the risk of SCD in PD patients are limited. One case control study containing only 24 patients with identified episodes of sudden cardiac death, identified smoking, aspirin use and low residual renal function as being associated with an increased risk of sudden cardiac death. But the study is underpowered and regarded of very low quality (5).

Heart failure is an important risk factor for SCD in both the general population and HD patients but may be difficult to differentiate from chronic volume overload in PD patients. Assessment of ventricular systolic function by ejection fraction may also be of limited use as it is affected by volume status. In addition, PD patients have a high incidence of heart failure with preserved ejection fraction (6) and heart failure with preserved ejection fraction is also associated with an increased risk of SCD (6). Wang et al. performed a 5-year prospective study in 230 end-stage renal disease patients receiving PD treatment, aiming to determine the role of echocardiography and the additional value of serum biomarkers in predicting sudden cardiac death. In the multivariable Cox regression analysis considering clinical, biochemical, dialysis, and echocardiographic parameters, left ventricular systolic dysfunction emerged as the most significant predictor of sudden cardiac death. An ejection fraction cutoff below 48% was associated with a specificity of 78.6% and a sensitivity of 57.7% in predicting sudden cardiac death. In the combined echocardiography and biomarker-based multivariable Cox regression model, N-terminal pro-brain natriuretic peptide lost significance to left ventricular ejection fraction, whereas cardiac troponin T retained significant association with SCD independent of echocardiographic parameters (7). In another study in HD patients, worsening of cardiac function was the strongest predictor of SCD (8). There is also suggestion from a post-hoc analysis of a randomized controlled trial in diabetic HD patients showing that poor glycemic control was associated with an increased risk of SCD (9). In addition, studies performed in HD patients, which may not be applicable to PD patients, showed that dialysate concentration and changes in serum calcium were associated with SCD (10). Interaction of C reactive protein and lipoproteins and also wasting (11) were associated with SCD in dialysis patients [Evidence Review Table 1].

It is unclear whether these results are applicable to PD patients. Pun et al also showed in a retrospective analysis that dialysis patients who survived an episode of tachyarrhythmic cardiac arrest had a strong indication of future risk of SCD(9), but at present it is not known the exact type of tachyarrhythmias in this setting, or whether the tachyarrhythmia is amenable to defibrillation therapy.

**Guideline 3.6.2: We suggest beta blockers be considered for primary prevention of sudden cardiac death in high risk peritoneal dialysis patients. (2D)**

#### **Rationale**

There are currently no randomized controlled trials that examined the effectiveness of various anti-arrhythmic agents in preventing SCD in PD patients, although some studies from CKD and HD patients suggest beta blockers may be associated with reduced rates of SCD (12, 13, 14); however, none of the studies examined SCD as the primary endpoint. The usefulness of beta blockers in preventing SCD remains to be confirmed in the PD population [Evidence Review Table 2].

**Evidence Review Table 1.** Studies showing the high prevalence and predictors of sudden cardiac death

| Reference                                            | Population  | Patient number       | Study design                                                   | Outcomes of interest                                                                                             | Follow-up duration (if applicable) | Results                                                                                                                                                                                                                                                                                                                        | Study quality |
|------------------------------------------------------|-------------|----------------------|----------------------------------------------------------------|------------------------------------------------------------------------------------------------------------------|------------------------------------|--------------------------------------------------------------------------------------------------------------------------------------------------------------------------------------------------------------------------------------------------------------------------------------------------------------------------------|---------------|
| Pun P. et al. Clin J Am Soc Nephrol. 2012 (2)        | HD patients | 363                  | Retrospective cohort study                                     | SCD                                                                                                              | 12 years                           | SCD common, 83% events were witnessed (p<0.001)                                                                                                                                                                                                                                                                                | C             |
| Wang AY, et al. Hypertension. 2010 (7)               | PD patients | 117 men<br>113 women | Prospective observational cohort study                         | SCD                                                                                                              | 5 years                            | Total: 115 deaths 28 deaths attributed to SCD (24%)                                                                                                                                                                                                                                                                            | B             |
| Paoletti E, et. al. Nephrol Dial Transplant 2004 (8) | HD patients | 123                  | Cohort study                                                   | Specific factor that might be associated with a higher risk of SCD                                               | 10 years                           | Worsening of LVH is the strongest predictor of sudden death (p=0.0030)                                                                                                                                                                                                                                                         | C             |
| Drechsler C, et al. Circulation 2009 (9)             | HD patients | 1255                 | Post-hoc analysis of a prospective randomized controlled trial | SCD                                                                                                              | Median: 4 years                    | Glycosylated hemoglobin (every 1% increase) was strongly associated with sudden cardiac death                                                                                                                                                                                                                                  | C             |
| Pun PH et. al. Clin J Am Soc Nephrol 2013 (10)       | HD patients | 43,200               | Case-control study                                             | Influence of serum Ca, dialysate Ca, and QT interval-prolonging medications on the risk of sudden cardiac arrest | 3 years                            | Low Ca dialysate, 2.5 mEq/L (odds ratio=2.00, 95% confidence interval=1.40–2.90), higher corrected serum Ca (odds ratio=1.10, 95% confidence interval=1.00–1.30), and increasing serum dialysate Ca gradient (odds ratio=1.40, 95% confidence interval=1.10–1.80) were associated with increased risk of sudden cardiac arrest | B             |
| Drechsler C, et. al. Am J Kidney Dis. 2011 (11)      | HD patients | 1,255                | Prospective cohort study.                                      | Risks of SCD, MI, stroke, combined cardiovascular events, deaths due to infection, and all-cause mortality       | 4 years                            | Patients with severe wasting had significantly increased risks of SCD (adjusted HR, 1.8; 95% CI, 1.1-3.1), all-cause mortality (adjusted HR, 1.8; 95% CI, 1.4-2.4), and deaths due to infection (adjusted HR, 2.3; 95% CI, 1.2-4.3). In contrast, MI was not                                                                   | C             |

|  |  |  |  |  |  |           |  |
|--|--|--|--|--|--|-----------|--|
|  |  |  |  |  |  | affected. |  |
|--|--|--|--|--|--|-----------|--|

HD = hemodialysis; PD = peritoneal dialysis; N/A = not available; SCD = sudden cardiac death, LVH = left ventricular hypertrophy; Ca = calcium; HR = hazard ratio; CI = confidence interval; MI = myocardial infarction

**Evidence Review Table 2.** Studies analyzing the impact of primary prevention with beta blockers

| Reference                                      | Population  | Patient number | Study design                          | Outcomes of interest                                    | Follow-up duration (if applicable) | Results                                                                                                                                                                                                                    | Study quality |
|------------------------------------------------|-------------|----------------|---------------------------------------|---------------------------------------------------------|------------------------------------|----------------------------------------------------------------------------------------------------------------------------------------------------------------------------------------------------------------------------|---------------|
| Cice G, et al. J Am Coll Cardiol 2003 (12)     | HD patients | 114            | Prospective, placebo-controlled trial | Sudden cardiac death (2 <sup>o</sup> endpoint of study) | 2 years                            | Carvedilol reduced morbidity and mortality in dialysis patients with dilated cardiomyopathy compared to placebo                                                                                                            | B             |
| Pun PH, et al. Clin J Am Soc Nephrol 2007 (13) | HD patients | 729            | Nested case-control                   | Survival after cardiac arrest                           | N/A                                | Medications may improve the chances of survival after cardiac arrest.                                                                                                                                                      | B             |
| Tangri N. et al. Am J Kidney Dis. 2011. (14)   | HD patients | 1,747          | Post hoc analysis of HEMO Study.      | Beta blockers for the prevention of SCD                 | 2 years                            | There was a significant interaction between beta blocker use and SCD (interaction $P = 0.03$ ) in patients with (cause-specific HR, 0.65; 95% CI, 0.42-1.01) and without IHD (cause-specific HR, 1.61; 95% CI, 0.92-2.80). | C             |

IHD = intermittent hemodialysis; PD = peritoneal dialysis; N/A = not available; SCD = sudden cardiac death; LVH = left ventricular hypertrophy; HR = hazard ratio; CI = confidence interval



**Guideline 3.6.3: We suggest an implantable cardioverter-defibrillator be considered for secondary prevention of sudden cardiac death in peritoneal dialysis patients who survive an episode of cardiac arrest confirmed as being the result of malignant ventricular arrhythmia (except those that occur within first 48 hours post-acute myocardial infarction). (2D)**

### **Rationale**

Implantable cardioverter-defibrillators are the only intervention that appear to robustly reduce sudden cardiac death in the setting of primary or secondary prevention in the general population (excluding immediately post myocardial infarction) (15). However, data relating to their use in CKD patients are very limited and there are virtually no data in PD patients. Current guidelines for their utilization are somewhat variably applied on a global basis even in patients without CKD (16). These guidelines rely significantly on identifying patients with markedly reduced cardiac contractile function (17), immediately bringing about difficulties in implementing the currently recommended criteria for implantable cardioverter-defibrillator implantation in PD patients.

There are so far no randomized studies examining the use of implantable cardioverter-defibrillators for primary prevention of sudden cardiac death in dialysis patients. Thus, the workgroup felt that a recommendation cannot be drawn in relation to implantable cardioverter-defibrillator use for primary prevention of sudden cardiac death in high risk PD patients. However, there are data from HD patients showing that the use of implantable cardioverter-defibrillators may be associated with an improved survival in survivors of cardiac arrests (18). However, the one-year survival of patients with an implantable cardioverter-defibrillator was significantly lower in those with CKD compared to those without CKD (96.3% vs 61.2%) (18). The explanation for the relative lack of efficacy of implantable cardioverter-defibrillator use in CKD patients is not understood. Efficacy may be lower as a result of the typically higher defibrillation thresholds, rendering implantable cardioverter-defibrillator use less effective in CKD (as does advancing age >80 years) (19). Thus, if the use of implantable cardioverter-defibrillators is indeed considered in PD patients, careful attention should be paid to fine tuning the threshold of the implantable cardioverter-defibrillator devices using programmed ventricular stimulation studies in PD patients. On the other hand, the complication rates associated with implantable cardioverter-defibrillator use, such as pocket infection or pneumothorax, appeared to be significantly higher in dialysis patients compared to non-CKD patients (19). A higher incidence of appropriate shocks (37.5% vs 10.5%) is characteristic of implantable cardioverter-defibrillators that were in use in dialysis patients compared to non-CKD patients (20). Finally, in a meta-analysis of CKD studies, implantable cardioverter-defibrillator use was associated with survival benefit for patients with glomerular filtration rate  $\geq 60$  mL/min, but not for patients with  $< 60$  mL/min (21) [Evidence Review Table 3]. Putting together the very limited evidence available, the workgroup suggests a weak recommendation statement be drawn regarding the use of an implantable cardioverter-defibrillator in PD patients who survive an episode of cardiac arrest confirmed to be resulting from malignant ventricular arrhythmia.

**Evidence Review Table 3.** Studies analyzing the impact of secondary prevention with implantable cardioverter-defibrillators

| Reference                                 | Population         | Patient number | Study design                                     | Outcomes of interest                                            | Follow-up duration (if applicable) | Results                                                                                                                                                                                                                                                                                                                | Study quality |
|-------------------------------------------|--------------------|----------------|--------------------------------------------------|-----------------------------------------------------------------|------------------------------------|------------------------------------------------------------------------------------------------------------------------------------------------------------------------------------------------------------------------------------------------------------------------------------------------------------------------|---------------|
| Pun PH. et al. Am J Kidney Dis. 2014 (21) | CKD patients       | 2,867          | Meta-analysis from randomized controlled trials. | Mortality, rehospitalizations, and effect modification by eGFR. | N/A                                | The ICD was associated with survival benefit for patients with eGFR less than 60 mL/min/1.73 m <sup>2</sup> (adjusted HR, 0.49; 95% posterior credible interval, 0.24-0.95), but not for patients with eGFR higher than 60 mL/min/1.73 m <sup>2</sup> (adjusted HR, 0.80; 95% posterior credible interval, 0.40-1.53). | B             |
| Herzog CA et al. Kidney Int 2005 (9)      | HD and PD patients | 6042           | Retrospective cohort study                       | Supports the use of ICDs for prevention of sudden death         | N/A                                | ICD implantation in cardiac arrest survivors on dialysis is associated with greater survival.                                                                                                                                                                                                                          | B             |

HD = hemodialysis; PD = peritoneal dialysis; N/A = not available; SCD = sudden cardiac death; LVH = left ventricular hypertrophy; ICD = implantable cardioverter-defibrillator; eGFR = estimated glomerular filtration rate; HR = hazard ratio;

## References

1. USRDS Annual Data Report. Cardiovascular special studies. [Available online at: [http://www.usrds.org/2004/pdf/09\\_cardio\\_04.pdf](http://www.usrds.org/2004/pdf/09_cardio_04.pdf)].
2. Pun P, *et al.* Improving Ascertainment of Sudden Cardiac Death in Patients with End Stage Renal Disease. *Clin J Am Soc Nephrol* 2012; 7: 116–122.
3. Selby NM, McIntyre CW. Peritoneal dialysis is not associated with myocardial stunning. *Perit Dial Int* 2011 Jan-Feb; 31(1):27-33
4. Selby NM, McIntyre CW. The acute cardiac effects of dialysis. *Semin Dial* 2007 May-Jun; 20(3):220-8
5. Chow KM, Szeto CC, Kwan BC, Chung KY, Leung CB, Li PK. Factors associated with sudden death in peritoneal dialysis patients. *Perit Dial Int* 2009 Jan-Feb;29(1):58-63
6. Wang AY, Wang M, Lam CW, Chan IH, Lui SF, Sanderson JE. Heart failure with preserved or reduced ejection fraction in patients treated with peritoneal dialysis. *Am J Kidney Dis* 2013 Jun;61(6):975-83.
7. Wang AYM, Wai-Kei Lam, Chan Iris Hiu-Shuen, Mei Wang, Siu-Fai Lui and John E. Sanderson. Sudden Cardiac Death in End-Stage Renal Disease Patients: A 5-Year Prospective Analysis. *Hypertension*. 2010; 56:210-6,
8. Paoletti E, Specchia C, Di Maio G, Bellino D, Damasio B, Cassottana P, Cannella G. The worsening of left ventricular hypertrophy is the strongest predictor of sudden cardiac death in haemodialysis patients: a 10 year survey. *Nephrol Dial Transplant* 2004; 19: 1829-34.
9. Drechsler C, Krane V, Ritz E, März W, Wanner C: Glycemic control and cardiovascular events in diabetic hemodialysis patients. *Circulation* 2009, 120(24):2421–8
10. Pun PH, Horton JR, Middleton JP. Dialysate Calcium Concentration and the Risk of Sudden Cardiac Arrest in Hemodialysis Patients. *Clin J Am Soc Nephrol* 2013, 8: 797–803.
11. Christiane Drechsler, Diana C. Grootendorst, Stefan Pilz, Andreas Tomaschitz, Vera Krane, Friedo Dekker, Winfried März, Eberhard Ritz, and Christoph Wanner. Wasting and Sudden Cardiac Death in Hemodialysis Patients: A Post Hoc Analysis of 4D (Die Deutsche Diabetes Dialyse Studie). *Am J Kidney Dis* 2011; 58(4):599-607.
12. Cice G, Ferrara L, D'Andrea A, D'Isa S, Di Benedetto A, Cittadini A, Russo PE, Golino P, Calabrò R: Carvedilol increases two-year survival in dialysis patients with dilated cardiomyopathy: a prospective, placebo-controlled trial. *J Am Coll Cardiol* 2003; 41:1438–44
13. Pun PH, Lehrich RW, Smith SR, Middleton JP: Predictors of survival after cardiac arrest in outpatient hemodialysis clinics. *Clin J Am Soc Nephrol* 2007; 2:491–500
14. Tangri N, Shastri S, Tighiouart H, Beck GJ, Cheung AK, Eknoyan G, Sarnak MJ. B-Blockers for Prevention of Sudden Cardiac Death in Patients on Hemodialysis: A Propensity Score Analysis of the HEMO Study. *Am J Kidney Dis* 2011; 58(6):939-945.
15. Greenberg H, Case RB, Moss AJ, Brown MW, Carroll ER, Andrews ML, MADIT- II Investigators: Analysis of mortality events in the Multicenter Automatic Defibrillator Implantation Trial (MADIT-II). *J Am Coll Cardiol* 2004; 43(8):1459–1465.
16. Proclemer A, Lewalter T, Bongiorno MG, Nielsen JH, Pison L, Lundqvist CB; Scientific Initiative Committee, European Heart Rhythm Association. Screening and risk evaluation for sudden cardiac death in ischaemic and non-ischaemic cardiomyopathy: results of the European Heart Rhythm Association survey. *Europace*. 2013 Jul;15(7):1059-62

17. Zipes DP, Camm AJ, Borggrefe M, American College of Cardiology/ American Heart Association Task Force; European Society of Cardiology Committee for Practice Guidelines; European Heart Rhythm Association; Heart Rhythm Society, et al: ACC/AHA/ESC 2006 Guidelines for Management of Patients With Ventricular Arrhythmias and the Prevention of Sudden Cardiac Death: a report of the American College of Cardiology/American Heart Association Task Force and the European Society of Cardiology Committee for Practice Guidelines (writing committee to develop Guidelines for Management of Patients With Ventricular Arrhythmias and the Prevention of Sudden Cardiac Death): developed in collaboration with the European Heart Rhythm Association and the Heart Rhythm Society. *Circulation* 2006; 114(10):e385–e484.
18. Herzog CA, Li S, Weinhandl ED, Strief JW, Collins AJ, Gilbertson DT: Survival of dialysis patients after cardiac arrest and the impact of implantable cardioverter defibrillators. *Kidney Int* 2005, 68(2):818–25
19. Dasgupta A, Montalvo J, Medendorp S, Lloyd-Jones DM, Ghossein C, Goldberger J, Passman R: Increased complication rates of cardiac rhythm management devices in ESRD patients. *Am J Kidney Dis* 2007, 49:656–63.
20. Hreybe H, Ezzeddine R, Bedi M, Barrington W, Bazaz R, Ganz LI, Jain S, Ngwu O, London B, Saba S: Renal insufficiency predicts the time to first appropriate defibrillator shock. *Am Heart J* 2006; 151:852–856.
21. Patrick H. Pun, Sana M. Al-Khatib, Joo Yoon Han, Rex Edwards, Gust H. Bardy, J. Thomas Bigger, Alfred E. Buxton, Arthur J. Moss, Kerry L. Lee, Richard Steinman, Paul Dorian, Al Hallstrom, Riccardo Cappato, Alan H. Kadish, Peter J. Kudenchuk, Daniel B. Mark, Paul L. Hess, Lurdes Y.T. Inoue, and Gillian D. Sanders. Implantable Cardioverter-Defibrillators for Primary Prevention of Sudden Cardiac Death in CKD: A Meta-analysis of Patient-Level Data From 3 Randomized Trials. *Am J Kidney Dis* 2014

## SECTION 7. ARTERIAL STIFFNESS

### Should peritoneal dialysis patients undergo regular assessment of pulse wave velocity?

#### Rationale

Arterial stiffness is increased in dialysis patients (1) and is principally related to arteriosclerosis involving the media of medium and large arteries (1-3). It can be measured by a variety of methods, including pulse wave velocity, augmentation index, systemic arterial compliance, arterial distensibility, arterial stiffness index and aortic distensibility using cardiovascular magnetic resonance imaging [reviewed in (1, 2)].

Of these different methods, pulse wave velocity has been the most extensively studied measure of arterial stiffness in dialysis populations and has generally been found to be independently predictive of both cardiovascular and all-cause mortality [Evidence Review Table 1]. Other measures of arterial stiffness have been studied to a more limited extent and their associations with survival outcomes have been more variable [Evidence Review Table 1]. Arterial stiffness therefore shows promise as a surrogate outcome measure for stratifying cardiovascular risk in peritoneal dialysis (PD) patients. However, there are so far no randomized controlled trials showing how reduced arterial stiffness parameters may result in an improvement in patient-level outcomes.

The National Kidney Foundation Kidney Disease Outcomes Quality Initiative (NKF-KDOQI) cardiovascular guidelines (4) recommend that “all dialysis patients should have pulse pressures (PP) determined monthly before dialysis” and that “for pulse pressure >60 mmHg and systolic blood pressure >135 mm Hg, it is recommended that pulse pressure be reduced by achieving ideal body weight and by the use of antihypertensive medication with target pulse pressure being 40 mm Hg.” In contrast, the Kidney Disease: Improving Global Outcomes (KDIGO), Caring for Australasians with Renal Impairment (CARI), European Best Practice, United Kingdom - National Institute for Health and Care Excellence (UK-NICE), Canadian Society of Nephrology and the American Heart Association/American College of Cardiology (AHA/ACC) guidelines make no specific recommendations regarding measurement or therapeutic manipulation of arterial stiffness. Based on the fact that pulse wave velocity is not yet a validated surrogate outcome measure, the workgroup felt that it may be premature to recommend routine regular assessment of pulse wave velocity in all PD patients [Evidence Review Table 1].

**Evidence Review Table 1.** Studies examining the associations between arterial stiffness and cardiovascular outcomes in peritoneal dialysis patients

| Reference                                       | Population                                                                                                            | Patient number  | Study design                                         | Outcomes of interest                                   | Follow-up duration (if applicable) | Results                                                                                                                                                                                                                                                                                                                                                                                                        | Study quality |
|-------------------------------------------------|-----------------------------------------------------------------------------------------------------------------------|-----------------|------------------------------------------------------|--------------------------------------------------------|------------------------------------|----------------------------------------------------------------------------------------------------------------------------------------------------------------------------------------------------------------------------------------------------------------------------------------------------------------------------------------------------------------------------------------------------------------|---------------|
| Szeto et al Am J Nephrol 2012 (5)               | Incident PD patients at a single Hong Kong center                                                                     | 155             | Prospective, longitudinal observational cohort study | Survival                                               | 2 years                            | Baseline carotid-femoral PWV $\geq 10$ m/s was associated with inferior survival compared to $< 10$ m/s (76.1% vs 88.6%, $p=0.006$ ).<br><br>Baseline carotid-femoral PWV was not an independent predictor of survival after adjustment for other cardiovascular risk factors.                                                                                                                                 | B             |
| Kato et al Ther Apher Dial 2012 (6)             | HD patients $< 76$ years old who did not have an abnormal ABI ( $< 0.90$ or $\geq 1.30$ ) at a single Japanese center | 135             | Prospective, longitudinal observational cohort study | Cardiovascular mortality                               | 63 $\pm$ 4 months                  | Highest tertile of brachial-ankle PWV associated with a higher risk of cardiovascular mortality (adjusted HR 16.9, 95% CI, 1.1-251.8, $p<0.05$ )<br><br>Cardio-ankle vascular index was not associated with cardiovascular mortality                                                                                                                                                                           | B             |
| Verbeke et al. Nephrol Dial Transplant 2011 (7) | Adult patients on PD or HD $> 3$ months from 47 European dialysis centers                                             | 1084 (31 on PD) | Prospective, longitudinal observational cohort study | Nonfatal cardiovascular events or death from any cause | 2 years                            | Increasing carotid-femoral PWV was associated with an increased risk of cardiovascular events (adjusted HR, 1.154, 95% CI, 1.085-1.228, $p<0.001$ )<br><br>Higher tertiles of abdominal aortic calcification were associated with an increased risk of cardiovascular event (tertile 1 reference; tertile 2 HR, 3.682, 95% CI, 1.356-9.997, $p=0.011$ ; tertile 3 HR, 8.640, 95% CI, 3.528-21.158, $p<0.001$ ) | B             |

|                                                |                                                                                    |                                         |                                                      |                                           |                        |                                                                                                                                                                                                                                                                                       |   |
|------------------------------------------------|------------------------------------------------------------------------------------|-----------------------------------------|------------------------------------------------------|-------------------------------------------|------------------------|---------------------------------------------------------------------------------------------------------------------------------------------------------------------------------------------------------------------------------------------------------------------------------------|---|
| Siphioglu et al Perit Dial Int 2012 (8)        | Patients on CAPD (not APD) $\geq 3$ months at a single Turkish center in July 2007 | 156 PD patients and 28 healthy controls | Prospective, longitudinal observational cohort study | Fatal and non-fatal cardiovascular events | 19.2 $\pm$ 6.4 months  | Aortic stiffness index independently predicted fatal and nonfatal CV events (HR, 1.239, 95% CI, 1.103-1.392), but not all-cause mortality in PD patients                                                                                                                              | B |
| El Hadj Othmane et al Orv Hetil 2010 (9)       | HD patients at a single Hungarian center                                           | 98                                      | Prospective, longitudinal observational cohort study | Cardiovascular mortality                  | 29 (1-34 months)       | Increased cardiovascular mortality predicted by increasing pre-dialysis carotid-femoral PWV (HR, 1.23, 95% CI, 1.07-1.42) and 10% lower pre-dialysis pulse pressure amplification (HR, 1.39, 95% CI, 1.02-1.89), but not by carotid augmentation index or carotid pulse pressure      | B |
| Gao et al Perit Dial Int 2010 (10)             | Prevalent PD patients at a single Hong Kong center                                 | 107                                     | Prospective, longitudinal observational cohort study | Hospitalization for CVD                   | 9.4 $\pm$ 4.6 months   | Carotid-femoral PWV was independently predictive of increased risk of hospitalization for cardiovascular disease (OR per m/s 1.74, p=0.041).                                                                                                                                          | C |
| Shoji et al Atherosclerosis 2010 (11)          | Prevalent HD patients at a single Japanese center                                  | 423                                     | Prospective, longitudinal observational cohort study | Cardiovascular mortality                  | 70 months              | Higher carotid arterial stiffness parameter $\beta$ was independently predictive of cardiovascular mortality                                                                                                                                                                          | B |
| Othmane et al Kidney Blood Press Res 2009 (12) | Prevalent HD patients at a single Hungarian center                                 | 98                                      | Prospective, longitudinal observational cohort study | Cardiovascular mortality                  | 29 months (range 1-34) | Cardiovascular mortality was predicted by increased pre-dialysis carotid-femoral PWV (HR per m/s .124, 95% CI, 1.07-1.44) and 10% lower carotid-brachial pulse pressure amplification (HR 1.41, 95% CI, 1.03-1.92), but not by carotid augmentation index nor carotid pulse pressure. | C |
| Adragao et al Nephrol Dial Transplant          | ESRD patients treated with HD >6 months                                            | 101                                     | Prospective, longitudinal observational              | Survival                                  | 43 months              | Mortality was associated with a simple vascular calcification score >3 (HR, 3.308, 95% CI, 1.109-9.863, p=0.032) and a pulse pressure > 70mmHg (HR, 3.227, 95% CI, 1.114-9.347,                                                                                                       | C |

|                                               |                                                                                                                  |                                |                                                      |                                                                              |           |                                                                                                                                                                                                                                                                                                                             |   |
|-----------------------------------------------|------------------------------------------------------------------------------------------------------------------|--------------------------------|------------------------------------------------------|------------------------------------------------------------------------------|-----------|-----------------------------------------------------------------------------------------------------------------------------------------------------------------------------------------------------------------------------------------------------------------------------------------------------------------------------|---|
| 2009 (13)                                     | at a single Portugese center                                                                                     |                                | cohort study                                         |                                                                              |           | p=0.031).<br>Mortality in non-diabetic patients was additionally predicted by PWV >10.5 m/s (HR, 1.092, 95% CI, 1.013-8.775, p=0.047)                                                                                                                                                                                       |   |
| Mark et al J Cardiovasc Magn Reson 2008 (14)  | Stage 5 CKD patients at a single Scottish center                                                                 | 144 (110 on dialysis)          | Prospective, longitudinal observational cohort study | Survival<br><br>Composite endpoint of death or nonfatal cardiovascular event | 24 months | Mortality was independently predicted by log [aortic distensibility] (HR, 0.135, 95% CI, 0.019-0.948, p=0.004)<br><br>Combined endpoint was independently predicted by log [aortic distensibility] (HR, 0.066, 95% CI, 0.013-0.347, p=0.001) and log [volumetric arterial strain] (HR, 0.026, 95% CI, 0.004-0.175, p<0.001) | C |
| Sigrist et al Clin J Am Soc Nephrol 2007 (15) | Stage 4 or 5 CKD at a single Renal unit in the United Kingdom                                                    | 134 (60 HD, 28 PD, 46 stage 4) | Prospective, longitudinal observational cohort study | Survival                                                                     | 24 months | Mortality was independently predicted by change in calcium score from 0-12 months (HR, 1.03, 95% CI, 1.01-1.05, p=0.03)                                                                                                                                                                                                     | C |
| Shoji et al J Am Soc Nephrol 2001 (16)        | ESRD patients treated with HD >6 months at a single Japanese dialysis center between June 1992 and December 1998 | 256                            | Prospective, longitudinal observational cohort study | Cardiovascular mortality<br><br>All-cause mortality                          | 63 months | PWV was a significant independent predictor of cardiovascular mortality (HR, 1.18, 95% CI, 1.01-1.39) and all-cause mortality (HR, 1.15, 95% CI, 1.03-1.29)                                                                                                                                                                 | B |
| Blacher et al Kidney Int                      | HD patients at a single                                                                                          | 242                            | Prospective, longitudinal                            | Cardiovascular mortality                                                     | 78±46     | Each 1 m/s increase in PWV independently predicted cardiovascular mortality (HR, 1.14, 95% CI, 1.03–1.26) and                                                                                                                                                                                                               | B |



|                                               |                                                                                                                                                       |     |                                                      |                                                     |                  |                                                                                                                                                                                                                                               |   |
|-----------------------------------------------|-------------------------------------------------------------------------------------------------------------------------------------------------------|-----|------------------------------------------------------|-----------------------------------------------------|------------------|-----------------------------------------------------------------------------------------------------------------------------------------------------------------------------------------------------------------------------------------------|---|
| 2003 (17)                                     | French center                                                                                                                                         |     | observational cohort study                           | All-cause mortality                                 | months           | all-cause mortality (HR, 1.14, 95% CI, 1.05–1.24).<br><br>Each 10 mmHg pulse pressure increment independently predicted all-cause mortality (HR, 1.14, 95% CI, 1.05–1.24) but not cardiovascular mortality (HR, 1.04, 95% CI, 0.92–1.18)      |   |
| Covic et al Nephrol Dial Transplant 2006 (18) | ESRD patients treated with HD ≥3 months at a single Romanian center between January 1998 and December 2001                                            | 92  | Prospective, longitudinal observational cohort study | All-cause mortality                                 | 61±25 months     | All-cause mortality was not independently predicted by augmentation index                                                                                                                                                                     | C |
| Blacher et al Hypertension 2001 (19)          | Stable ESRD treated with on HD for ≥3 months with no clinical cardiovascular disease during the previous 6 months at a single French center 1994-1998 | 110 | Prospective, longitudinal observational cohort study | Cardiovascular mortality<br><br>All-cause mortality | 53±21 months     | Each 1 standard deviation increase in carotid incremental elastic modulus was associated with increased risks of both all-cause mortality (HR, 1.6, 95% CI, 1.2-2.2, p<0.01) and cardiovascular mortality (HR, 1.7, 95% CI, 1.2-2.4, p<0.01). | B |
| Zoungas et al Am J Kidney                     | Stage 4-5 CKD aged 24-79 years                                                                                                                        | 315 | Prospective, longitudinal observational              | Composite endpoint of fatal and                     | Median 3.6 years | An increased risk of the composite cardiovascular endpoint was independently predicted by increased aortofemoral pulse wave velocity (HR per m/s 1.12, 95% CI 1.05-1.20,                                                                      | B |

|               |                                                                                     |  |              |                                |  |                                                                                                                       |  |
|---------------|-------------------------------------------------------------------------------------|--|--------------|--------------------------------|--|-----------------------------------------------------------------------------------------------------------------------|--|
| Dis 2007 (20) | participating in the Atherosclerosis and Folic Acid Supplementati on Trial (ASFAST) |  | cohort study | nonfatal cardiovascular events |  | p=0.001), but not systemic arterial compliance, carotid-derived augmentation index or carotid intima-media thickness. |  |
|---------------|-------------------------------------------------------------------------------------|--|--------------|--------------------------------|--|-----------------------------------------------------------------------------------------------------------------------|--|

PD = peritoneal dialysis; PWV = pulse wave velocity; HD = hemodialysis; ABI = ankle-brachial index; HR = hazard ratio; CI = confidence interval; CAPD = continuous ambulatory peritoneal dialysis; APD = automated peritoneal dialysis; CV = cardiovascular; CVD = cardiovascular disease; CKD = chronic kidney disease; ESRD = end stage renal disease

## References

1. Kanbay M, Afsar B, Gusbeth-Tatomir P, Covic A. Arterial stiffness in dialysis patients: Where are we now? *Int Urol.Nephrol.* 2010; 42:741-752.
2. Zoungas S, Asmar RP. Arterial stiffness and cardiovascular outcome. *Clin.Exp.Pharmacol.Physiol.* 2007; 34:647-651.
3. Gusbeth-Tatomir P, Covic A. Causes and consequences of increased arterial stiffness in chronic kidney disease patients. *Kidney Blood Press Res.* 2007; 30:97-107.
4. K/DOQI clinical practice guidelines for cardiovascular disease in dialysis patients. *Am J Kidney Dis.* 2005; 45:S1-153.
5. Szeto CC, Kwan BC, Chow KM, Leung CB, Law MC, Li PK. Prognostic value of arterial pulse wave velocity in peritoneal dialysis patients. *Am J Nephrol.* 2012; 35:127-133.
6. Kato A, Takita T, Furuhashi M, Maruyama Y, Miyajima H, Kumagai H. Brachial-ankle pulse wave velocity and the cardio-ankle vascular index as a predictor of cardiovascular outcomes in patients on regular hemodialysis. *Ther.Apher.Dial.* 2012; 16:232-241.
7. Verbeke F, Van Biesen W, Honkanen E, Wikstrom B, Jensen PB, Krzesinski JM, et al. Prognostic value of aortic stiffness and calcification for cardiovascular events and mortality in dialysis patients: Outcome of the calcification outcome in renal disease (CORD) study. *Clin.J Am Soc Nephrol.* 2011; 6:153-159.
8. Sipahioglu MH, Kucuk H, Unal A, Kaya MG, Oguz F, Tokgoz B, et al. Impact of arterial stiffness on adverse cardiovascular outcomes and mortality in peritoneal dialysis patients. *Perit Dial Int.* 2012; 32:73-80.
9. El Hadj OT, Kiss I, Nemcsik J, Fekete CB, Deak G, Egresits J, et al. [significance of arterial stiffness parameters for predicting cardiovascular mortality in hemodialysis patients: A prospective cohort study]. *Orv.Hetil.* 2010; 151:741-748.
10. Gao N, Kwan BC, Chow KM, Chung KY, Pang WF, Leung CB, et al. Arterial pulse wave velocity and peritoneal transport characteristics independently predict hospitalization in chinese peritoneal dialysis patients. *Perit Dial Int.* 2010; 30:80-85.
11. Shoji T, Maekawa K, Emoto M, Okuno S, Yamakawa T, Ishimura E, et al. Arterial stiffness predicts cardiovascular death independent of arterial thickness in a cohort of hemodialysis patients. *Atherosclerosis.* 2010; 210:145-149.
12. Othmane TH, Nemcsik J, Fekete BC, Deak G, Egresits J, Fodor E, et al. Arterial stiffness in hemodialysis: Which parameter to measure to predict cardiovascular mortality? *Kidney Blood Press Res.* 2009; 32:250-257.
13. Adragao T, Pires A, Birne R, Curto JD, Lucas C, Goncalves M, et al. A plain x-ray vascular calcification score is associated with arterial stiffness and mortality in dialysis patients. *Nephrol Dial Transplant.* 2009; 24:997-1002.
14. Mark PB, Doyle A, Blyth KG, Patel RK, Weir RA, Steedman T, et al. Vascular function assessed with cardiovascular magnetic resonance predicts survival in patients with advanced chronic kidney disease. *J Cardiovasc.Magn Reson.* 2008; 10:39.
15. Sigrist MK, Taal MW, Bungay P, McIntyre CW. Progressive vascular calcification over 2 years is associated with arterial stiffening and increased mortality in patients with stages 4 and 5 chronic kidney disease. *Clin.J Am Soc Nephrol.* 2007; 2:1241-1248.

16. Shoji T, Emoto M, Shinohara K, Kakiya R, Tsujimoto Y, Kishimoto H, et al. Diabetes mellitus, aortic stiffness, and cardiovascular mortality in end-stage renal disease. *J Am Soc Nephrol*. 2001; 12:2117-2124.
17. Blacher J, Safar ME, Guerin AP, Pannier B, Marchais SJ, London GM. Aortic pulse wave velocity index and mortality in end-stage renal disease. *Kidney Int*. 2003; 63:1852-1860.
18. Covic A, Mardare N, Gusbeth-Tatomir P, Prisada O, Sascau R, Goldsmith DJ. Arterial wave reflections and mortality in haemodialysis patients--only relevant in elderly, cardiovascularly compromised? *Nephrol Dial Transplant*. 2006; 21:2859-2866.
19. Blacher J, Guerin AP, Pannier B, Marchais SJ, London GM. Arterial calcifications, arterial stiffness, and cardiovascular risk in end-stage renal disease. *Hypertension*. 2001; 38:938-942.
20. Zoungas S, Cameron JD, Kerr PG, Wolfe R, Muske C, McNeil JJ, et al. Association of carotid intima-medial thickness and indices of arterial stiffness with cardiovascular disease outcomes in ckd. *Am J Kidney Dis*. 2007; 50:622-630.
